# Supplementary material for: Integrative Whole-Transcriptome Sequencing Analysis of Skin Tissues with Different Coat Types in Cashmere Goats Across Stages of Hair Follicle Development
Source: Research Square preprint supplement (doi:10.21203/rs.3.rs-8537359/v1), 2026-01-23
Supplement: Supplementary file 1 [file 2957187442b9fd098c2f4872.xlsx]

## Sheet: Table S1
Table S1 Summary of transcriptome sequencing quality control data
Sample	Raw_reads	Clean_reads	Q20 (%)	Q30 (%)	GC_content
CHSC_1_AN	85410926	83025234	97.12	92.36	45.97
CHSC_2_AN	86708902	85285030	97.71	93.66	44.52
CHSC_3_AN	85233504	82983260	97.62	93.67	47.61
CHSC_4_AN	84845574	83525120	97.79	93.81	45.51
CHSC_5_AN	87173324	82512480	96.17	91.39	55.4
CHLC_1_AN	85134210	81395930	96.79	92.31	50.97
CHLC_2_AN	85309750	82985516	97.5	93.41	48.46
CHLC_3_AN	83462370	81011644	97.62	93.71	48.87
CHLC_4_AN	85249054	83821110	97.71	93.69	45.97
CHLC_5_AN	85154680	82861846	97.58	93.63	47.88
CHSC_1_CA	83535680	82142452	97.55	93.58	48.27
CHSC_2_CA	87013328	85186718	97.69	93.8	47.79
CHSC_3_CA	87551742	86120966	97.84	94.09	47.8
CHLC_1_CA	81558888	79105278	97.78	94.04	47.64
CHLC_2_CA	83240856	80906486	97.78	93.96	46.24
CHLC_3_CA	81222660	78352106	97.63	93.69	48.46
CHLC_4_CA	84617182	79609186	97.09	92.93	48.68
CHLC_5_CA	82807340	79533208	97.78	94.05	48.37
CHSC_4_CA	93803714	86067978	97.63	93.4	49.36
CHSC_5_CA	85038984	81031184	97.59	93.17	49.56
CHSC_1_TE	82901888	81620824	97.74	93.82	48.38
CHSC_2_TE	50253748	49352048	97.87	94.4	50.6
CHSC_3_TE	95820812	94190484	97.91	94.41	49.86
CHLC_1_TE	93938758	92300952	97.79	94.2	49.27
CHLC_2_TE	59862684	58741564	97.9	94.47	49.18
CHLC_3_TE	39025368	38269938	97.81	94.22	49.56
CHLC_4_TE	92746268	90912696	97.87	94.38	51.14
CHLC_5_TE	102845410	100849618	97.96	94.55	50.68
CHSC_4_TE	55579140	54358584	97.89	94.45	50.98
CHSC_5_TE	87566380	85624244	97.89	94.4	51.2
NOTE: Sample, sample name; Raw_reads, sequencing reads directly generated by the sequencer; Clean_reads, number of reads after filtering out low-quality sequences, adapters, and contaminants from the raw data; Q20, percentage of bases with a Phred quality score ≥20 (error rate ≤1%) in the total bases; Q30, percentage of bases with a Phred quality score ≥30 (error rate ≤0.1%) in the total bases; G…

## Sheet: Table S2
Table S2 Alignment statistics of clean reads from transcriptome sequencing samples
Sample	Total_reads	Total_map	Unique_map	Multi_map	Read1_map	Read2_map	Positive_map	Negative_map	Splice_map	Unsplice_map	Proper_map
CHSC_1_AN	83025234	79877513(96.21%)	77347960(93.16%)	2529553(3.05%)	38910793(46.87%)	38437167(46.3%)	38623120(46.52%)	38724840(46.64%)	13342799(16.07%)	64005161(77.09%)	74645284(89.91%)
CHSC_2_AN	85285030	82595886(96.85%)	80545859(94.44%)	2050027(2.40%)	40331864(47.29%)	40213995(47.15%)	40231993(47.17%)	40313866(47.27%)	14201870(16.65%)	66343989(77.79%)	78214248(91.71%)
CHSC_3_AN	82983260	79047446(95.26%)	75822888(91.37%)	3224558(3.89%)	37946094(45.73%)	37876794(45.64%)	37859898(45.62%)	37962990(45.75%)	16673944(20.09%)	59148944(71.28%)	73344202(88.38%)
CHSC_4_AN	83525120	80991452(96.97%)	78434924(93.91%)	2556528(3.06%)	39264335(47.01%)	39170589(46.9%)	39186208(46.92%)	39248716(46.99%)	14247828(17.06%)	64187096(76.85%)	76268864(91.31%)
CHSC_5_AN	82512480	75224830(91.17%)	69273739(83.96%)	5951091(7.21%)	34636932(41.98%)	34636807(41.98%)	34384159(41.67%)	34889580(42.28%)	14172362(17.18%)	55101377(66.78%)	65414124(79.28%)
CHLC_1_AN	81395930	74941895(92.07%)	70784473(86.96%)	4157422(5.11%)	35444754(43.55%)	35339719(43.42%)	35204880(43.25%)	35579593(43.71%)	10239780(12.58%)	60544693(74.38%)	67457732(82.88%)
CHLC_2_AN	82985516	79711925(96.06%)	76114659(91.72%)	3597266(4.33%)	38103859(45.92%)	38010800(45.8%)	37991191(45.78%)	38123468(45.94%)	17701003(21.33%)	58413656(70.39%)	73661810(88.76%)
CHLC_3_AN	81011644	77708811(95.92%)	73672973(90.94%)	4035838(4.98%)	36870423(45.51%)	36802550(45.43%)	36778477(45.40%)	36894496(45.54%)	17029128(21.02%)	56643845(69.92%)	71277810(87.98%)
CHLC_4_AN	83821110	81107226(96.76%)	78540111(93.70%)	2567115(3.06%)	39339101(46.93%)	39201010(46.77%)	39233589(46.81%)	39306522(46.89%)	13982515(16.68%)	64557596(77.02%)	76287370(91.01%)
CHLC_5_AN	82861846	79586898(96.05%)	76459031(92.27%)	3127867(3.77%)	38249474(46.16%)	38209557(46.11%)	38158139(46.05%)	38300892(46.22%)	16187342(19.54%)	60271689(72.74%)	73917636(89.21%)
CHSC_1_CA	82142452	78742455(95.86%)	74073679(90.18%)	4668776(5.68%)	37332966(45.45%)	36740713(44.73%)	37006737(45.05%)	37066942(45.13%)	17987888(21.90%)	56085791(68.28%)	71667088(87.25%)
CHSC_2_CA	85186718	81708051(95.92%)	77678520(91.19%)	4029531(4.73%)	39120763(45.92%)	38557757(45.26%)	38806629(45.55%)	38871891(45.63%)	16256418(19.08%)	61422102(72.10%)	75280822(88.37%)
CHSC_3_CA	86120966	82683632(96.01%)	78295969(90.91%)	4387663(5.09%)	39354068(45.70%)	38941901(45.22%)	39115932(45.42%)	39180037(45.49%)	17139454(19.90%)	61156515(71.01%)	76038372(88.29%)
CHLC_1_CA	79105278	74784315(94.54%)	70808602(89.51%)	3975713(5.03%)	35609118(45.01%)	35199484(44.50%)	35360814(44.70%)	35447788(44.81%)	13871889(17.54%)	56936713(71.98%)	68488182(86.58%)
CHLC_2_CA	80906486	77434016(95.71%)	73932566(91.38%)	3501450(4.33%)	37190934(45.97%)	36741632(45.41%)	36929044(45.64%)	37003522(45.74%)	10624336(13.13%)	63308230(78.25%)	71627464(88.53%)
CHLC_3_CA	78352106	74731402(95.38%)	69617970(88.85%)	5113432(6.53%)	35066103(44.75%)	34551867(44.10%)	34778068(44.39%)	34839902(44.47%)	13947513(17.80%)	55670457(71.05%)	67190242(85.75%)
CHLC_4_CA	79609186	75258149(94.53%)	69680964(87.53%)	5577185(7.01%)	35377102(44.44%)	34303862(43.09%)	34809928(43.73%)	34871036(43.80%)	15798867(19.85%)	53882097(67.68%)	66640436(83.71%)
CHLC_5_CA	79533208	76302856(95.94%)	71275559(89.62%)	5027297(6.32%)	35843978(45.07%)	35431581(44.55%)	35606622(44.77%)	35668937(44.85%)	16127512(20.28%)	55148047(69.34%)	69056042(86.83%)
CHSC_4_CA	86067978	81503830(94.7%)	75114080(87.27%)	6389750(7.42%)	37621311(43.71%)	37492769(43.56%)	37499033(43.57%)	37615047(43.70%)	16849260(19.58%)	58264820(67.70%)	72590906(84.34%)
CHSC_5_CA	81031184	77199428(95.27%)	69723619(86.05%)	7475809(9.23%)	34951241(43.13%)	34772378(42.91%)	34814574(42.96%)	34909045(43.08%)	17075858(21.07%)	52647761(64.97%)	67512988(83.32%)
CHSC_1_TE	81620824	78415278(96.07%)	74234076(90.95%)	4181202(5.12%)	37270604(45.66%)	36963472(45.29%)	37092538(45.44%)	37141538(45.50%)	19679532(24.11%)	54554544(66.84%)	71861532(88.04%)
CHSC_2_TE	49352048	47085703(95.41%)	43228463(87.59%)	3857240(7.82%)	21708665(43.99%)	21519798(43.60%)	21601966(43.77%)	21626497(43.82%)	13581344(27.52%)	29647119(60.07%)	41854108(84.81%)
CHSC_3_TE	94190484	90265288(95.83%)	83980392(89.16%)	6284896(6.67%)	42172704(44.77%)	41807688(44.39%)	41971254(44.56%)	42009138(44.60%)	25040140(26.58%)	58940252(62.58%)	81368230(86.39%)
CHLC_1_TE	92300952	87001060(94.26%)	81265047(88.04%)	5736013(6.21%)	40805596(44.21%)	40459451(43.83%)	40568243(43.95%)	40696804(44.09%)	22461792(24.34%)	58803255(63.71%)	78618420(85.18%)
CHLC_2_TE	58741564	55791101(94.98%)	52035619(88.58%)	3755482(6.39%)	26107167(44.44%)	25928452(44.14%)	25991708(44.25%)	26043911(44.34%)	14210523(24.19%)	37825096(64.39%)	50452242(85.89%)
CHLC_3_TE	38269938	36597115(95.63%)	33905101(88.59%)	2692014(7.03%)	17031196(44.50%)	16873905(44.09%)	16935229(44.25%)	16969872(44.34%)	9549323(24.95%)	24355778(63.64%)	32855546(85.85%)
CHLC_4_TE	90912696	86553681(95.21%)	78546847(86.40%)	8006834(8.81%)	39405981(43.34%)	39140866(43.05%)	39214905(43.13%)	39331942(43.26%)	23024438(25.33%)	55522409(61.07%)	76166880(83.78%)
CHLC_5_TE	100849618	96661850(95.85%)	86353930(85.63%)	10307920(10.22%)	43342888(42.98%)	43011042(42.65%)	43141769(42.78%)	43212161(42.85%)	28060407(27.82%)	58293523(57.80%)	83758642(83.05%)
CHSC_4_TE	54358584	51842639(95.37%)	46576912(85.68%)	5265727(9.69%)	23389073(43.03%)	23187839(42.66%)	23268728(42.81%)	23308184(42.88%)	12798969(23.55%)	33777943(62.14%)	45121524(83.01%)
CHSC_5_TE	85624244	81894214(95.64%)	72792251(85.01%)	9101963(10.63%)	36549662(42.69%)	36242589(42.33%)	36369058(42.48%)	36423193(42.54%)	20182086(23.57%)	52610165(61.44%)	70672410(82.54%)
NOTE: Sample, sample name; Total_reads, number of clean reads obtained after quality control of the sequencing raw data; Total_map, the count and percentage of clean reads aligned to the reference genome; Multi_map, the number and proportion of clean reads mapped to multiple genomic loci; Unique_map, the count and percentage of reads aligned to a single, unique position in the reference genome; R…

## Sheet: Table S3
Table S3 Co-expression relationships between DE lncRNAs and DE mRNAs in anagen phase
lncRNA_ID	lncRNA_Gene_ID	lncRNA_Gene_Symbol	Status	mRNA_Gene_ID	mRNA_Gene_Symbol	Pearson_correlation	Pvalue
TCONS_00056769	102190335	SPAG1	Novel_lncRNA	XLOC_022645	XLOC_022645	0.950003	7.61e-06
TCONS_00100203	102185993	ATP7A	Novel_lncRNA	102177553	ANAPC10	0.950013	7.6e-06
TCONS_00009331	102188539	ITGB6	Novel_lncRNA	102180516	C15H11orf42	0.950037	7.59e-06
TCONS_00100203	102185993	ATP7A	Novel_lncRNA	108635242	LOC108635242	0.950039	7.58e-06
TCONS_00017375	102185804	GNAI1	Novel_lncRNA	102186094	DEPDC4	0.95005	7.58e-06
XR_001917274.1	102171119	LOC102171119	Annotated_lncRNA	102176830	SLC9A9	0.950054	7.57e-06
TCONS_00107129	108635404	LOC108635404	Novel_lncRNA	XLOC_060621	XLOC_060621	0.950062	7.57e-06
TCONS_00079345	102171102	NIPBL	Novel_lncRNA	108638412	LOC108638412	0.950065	7.57e-06
TCONS_00007312	102186529	FAM171B	Novel_lncRNA	108636534	LOC108636534	0.950072	7.56e-06
TCONS_00002588	XLOC_001767	XLOC_001767	Novel_lncRNA	108634775	LOC108634775	0.950084	7.55e-06
TCONS_00101125	108634335	SHROOM2	Novel_lncRNA	102168616	CCSER1	0.950096	7.55e-06
TCONS_00104359	108634655	LOC108634655	Novel_lncRNA	102191622	CAMKMT	0.9501	7.54e-06
TCONS_00105665	XLOC_066994	XLOC_066994	Novel_lncRNA	XLOC_060054	XLOC_060054	0.95011	7.54e-06
TCONS_00004691	102176274	ATP2C1	Novel_lncRNA	102188466	WASL	0.950121	7.53e-06
XR_001917334.1	106503653	LOC106503653	Annotated_lncRNA	102191614	GRIN3A	0.95013	7.52e-06
TCONS_00048653	102180678	MAP4K3	Novel_lncRNA	102187187	IMMP2L	0.950147	7.51e-06
TCONS_00051588	102191627	PCCA	Novel_lncRNA	108634845	LOC108634845	0.95015	7.51e-06
TCONS_00035962	102169005	SH3RF1	Novel_lncRNA	108635301	LOC108635301	0.950157	7.5e-06
TCONS_00049912	102181507	STRBP	Novel_lncRNA	102178628	MNAT1	0.950163	7.5e-06
TCONS_00105078	108634775	LOC108634775	Novel_lncRNA	108636938	TRNAC-GCA	0.950168	7.5e-06
TCONS_00025728	102176770	PPP3CA	Novel_lncRNA	102191622	CAMKMT	0.950175	7.49e-06
TCONS_00071133	102173960	DNAJA2	Novel_lncRNA	102170234	LOC102170234	0.950179	7.49e-06
TCONS_00004633	102173974	DNAJC13	Novel_lncRNA	102171040	LOC102171040	0.950181	7.49e-06
TCONS_00062851	102168651	PDGFD	Novel_lncRNA	XLOC_060054	XLOC_060054	0.950193	7.48e-06
TCONS_00104874	108634747	LOC108634747	Novel_lncRNA	102169752	SRFBP1	0.950194	7.48e-06
TCONS_00083987	102172491	LANCL2	Novel_lncRNA	102173098	LOC102173098	0.950221	7.46e-06
TCONS_00000861	102188353	HSPBAP1	Novel_lncRNA	XLOC_017040	XLOC_017040	0.950222	7.46e-06
TCONS_00079345	102171102	NIPBL	Novel_lncRNA	102181635	FHIT	0.950228	7.46e-06
TCONS_00104890	108634747	LOC108634747	Novel_lncRNA	102191614	GRIN3A	0.950248	7.44e-06
TCONS_00062165	102189776	PLEKHA7	Novel_lncRNA	102170234	LOC102170234	0.950304	7.41e-06
TCONS_00037564	102170234	LOC102170234	Novel_lncRNA	102191138	PDSS2	0.950306	7.41e-06
TCONS_00104357	108634655	LOC108634655	Novel_lncRNA	XLOC_060963	XLOC_060963	0.950307	7.41e-06
TCONS_00107136	108635404	LOC108635404	Novel_lncRNA	102184378	MCF2L2	0.950313	7.4e-06
TCONS_00105665	XLOC_066994	XLOC_066994	Novel_lncRNA	XLOC_060963	XLOC_060963	0.950315	7.4e-06
TCONS_00104374	108634655	LOC108634655	Novel_lncRNA	XLOC_022645	XLOC_022645	0.950319	7.4e-06
TCONS_00007312	102186529	FAM171B	Novel_lncRNA	102187187	IMMP2L	0.950321	7.4e-06
TCONS_00063391	102169401	AHCTF1	Novel_lncRNA	102169869	IFT74	0.950323	7.39e-06
TCONS_00049912	102181507	STRBP	Novel_lncRNA	102189948	LOC102189948	0.950327	7.39e-06
TCONS_00038362	102191138	PDSS2	Novel_lncRNA	1485866	ND5	0.950349	7.38e-06
TCONS_00107034	XLOC_067998	XLOC_067998	Novel_lncRNA	108635301	LOC108635301	0.950375	7.36e-06
TCONS_00014574	XLOC_009163	XLOC_009163	Novel_lncRNA	102186094	DEPDC4	0.950394	7.35e-06
TCONS_00107456	XLOC_068302	XLOC_068302	Novel_lncRNA	102169752	SRFBP1	0.950398	7.35e-06
TCONS_00098561	XLOC_062381	XLOC_062381	Novel_lncRNA	102175089	CUTC	0.950399	7.35e-06
TCONS_00025728	102176770	PPP3CA	Novel_lncRNA	108636916	LOC108636916	0.950402	7.34e-06
TCONS_00051058	106502327	LOC106502327	Novel_lncRNA	102191614	GRIN3A	0.950403	7.34e-06
TCONS_00098561	XLOC_062381	XLOC_062381	Novel_lncRNA	102191716	ERICH5	0.950423	7.33e-06
TCONS_00093961	102190578	GRK5	Novel_lncRNA	XLOC_022645	XLOC_022645	0.950427	7.33e-06
TCONS_00079345	102171102	NIPBL	Novel_lncRNA	102190528	TDRD3	0.950428	7.33e-06
TCONS_00107089	XLOC_068035	XLOC_068035	Novel_lncRNA	XLOC_060963	XLOC_060963	0.950439	7.32e-06
XR_001917274.1	102171119	LOC102171119	Annotated_lncRNA	XLOC_038940	XLOC_038940	0.950444	7.32e-06
TCONS_00105078	108634775	LOC108634775	Novel_lncRNA	102188518	LOC102188518	0.950453	7.31e-06
TCONS_00037564	102170234	LOC102170234	Novel_lncRNA	102191246	GPHN	0.950457	7.31e-06
TCONS_00031267	XLOC_019976	XLOC_019976	Novel_lncRNA	108634770	LOC108634770	0.950457	7.31e-06
TCONS_00105602	108634845	LOC108634845	Novel_lncRNA	108634577	LOC108634577	0.950462	7.3e-06
TCONS_00105068	108634775	LOC108634775	Novel_lncRNA	108636534	LOC108636534	0.950477	7.29e-06
TCONS_00104874	108634747	LOC108634747	Novel_lncRNA	102169186	LOC102169186	0.950483	7.29e-06
TCONS_00018500	102179544	AHCYL2	Novel_lncRNA	108636938	TRNAC-GCA	0.9505	7.28e-06
TCONS_00100203	102185993	ATP7A	Novel_lncRNA	108636916	LOC108636916	0.950516	7.27e-06
TCONS_00100203	102185993	ATP7A	Novel_lncRNA	102183387	LOC102183387	0.950524	7.26e-06
TCONS_00062165	102189776	PLEKHA7	Novel_lncRNA	102190095	SDK1	0.950535	7.26e-06
TCONS_00062851	102168651	PDGFD	Novel_lncRNA	1485867	ND6	0.950541	7.25e-06
TCONS_00098561	XLOC_062381	XLOC_062381	Novel_lncRNA	102183387	LOC102183387	0.950545	7.25e-06
TCONS_00105068	108634775	LOC108634775	Novel_lncRNA	102188466	WASL	0.95055	7.25e-06
TCONS_00100381	102179748	OPHN1	Novel_lncRNA	102170234	LOC102170234	0.950558	7.24e-06
TCONS_00035964	102169005	SH3RF1	Novel_lncRNA	XLOC_060963	XLOC_060963	0.950558	7.24e-06
TCONS_00107085	XLOC_068035	XLOC_068035	Novel_lncRNA	XLOC_060963	XLOC_060963	0.950562	7.24e-06
TCONS_00028890	102184717	EFNA5	Novel_lncRNA	XLOC_060963	XLOC_060963	0.950562	7.24e-06
TCONS_00101113	102189748	TBL1X	Novel_lncRNA	XLOC_060963	XLOC_060963	0.950562	7.24e-06
TCONS_00107086	XLOC_068035	XLOC_068035	Novel_lncRNA	XLOC_060963	XLOC_060963	0.950562	7.24e-06
TCONS_00107135	108635404	LOC108635404	Novel_lncRNA	XLOC_060963	XLOC_060963	0.950562	7.24e-06
TCONS_00107141	108635404	LOC108635404	Novel_lncRNA	XLOC_060963	XLOC_060963	0.950562	7.24e-06
TCONS_00059256	102187511	CELF1	Novel_lncRNA	XLOC_060963	XLOC_060963	0.950562	7.24e-06
TCONS_00062540	102174049	ZC3H12C	Novel_lncRNA	XLOC_060963	XLOC_060963	0.950562	7.24e-06
TCONS_00062935	102183894	PRELP	Novel_lncRNA	XLOC_060963	XLOC_060963	0.950562	7.24e-06
TCONS_00106358	XLOC_067486	XLOC_067486	Novel_lncRNA	XLOC_060963	XLOC_060963	0.950562	7.24e-06
TCONS_00010589	102174897	LOC102174897	Novel_lncRNA	XLOC_060963	XLOC_060963	0.950562	7.24e-06
TCONS_00078993	102174160	RNF180	Novel_lncRNA	XLOC_060963	XLOC_060963	0.950562	7.24e-06
TCONS_00078182	102169909	ARL15	Novel_lncRNA	XLOC_060963	XLOC_060963	0.950562	7.24e-06
TCONS_00079344	102171102	NIPBL	Novel_lncRNA	XLOC_060963	XLOC_060963	0.950562	7.24e-06
TCONS_00075436	XLOC_048175	XLOC_048175	Novel_lncRNA	XLOC_060963	XLOC_060963	0.950562	7.24e-06
TCONS_00034293	102186591	BNC2	Novel_lncRNA	XLOC_060963	XLOC_060963	0.950562	7.24e-06
TCONS_00036852	102183872	SHB	Novel_lncRNA	XLOC_060963	XLOC_060963	0.950562	7.24e-06
TCONS_00040550	102190605	CNKSR3	Novel_lncRNA	XLOC_060963	XLOC_060963	0.950562	7.24e-06
TCONS_00021876	102168517	DUSP16	Novel_lncRNA	XLOC_060963	XLOC_060963	0.950562	7.24e-06
TCONS_00036044	108636534	LOC108636534	Novel_lncRNA	108634770	LOC108634770	0.950565	7.24e-06
TCONS_00104890	108634747	LOC108634747	Novel_lncRNA	102170234	LOC102170234	0.950566	7.24e-06
TCONS_00106268	108635079	LOC108635079	Novel_lncRNA	102169752	SRFBP1	0.950571	7.23e-06
TCONS_00049912	102181507	STRBP	Novel_lncRNA	102170123	LOC102170123	0.950575	7.23e-06
TCONS_00083277	102182265	C22H3orf67	Novel_lncRNA	102181635	FHIT	0.950576	7.23e-06
TCONS_00001068	102189992	P3H2	Novel_lncRNA	106502527	LOC106502527	0.950582	7.23e-06
TCONS_00062165	102189776	PLEKHA7	Novel_lncRNA	102174689	CA10	0.950584	7.22e-06
TCONS_00016399	102189827	CNOT4	Novel_lncRNA	1485867	ND6	0.95059	7.22e-06
TCONS_00014574	XLOC_009163	XLOC_009163	Novel_lncRNA	102183148	MCC	0.950593	7.22e-06
TCONS_00093961	102190578	GRK5	Novel_lncRNA	102169869	IFT74	0.950594	7.22e-06
TCONS_00025728	102176770	PPP3CA	Novel_lncRNA	XLOC_028036	XLOC_028036	0.950598	7.22e-06
TCONS_00104359	108634655	LOC108634655	Novel_lncRNA	102169752	SRFBP1	0.950606	7.21e-06
TCONS_00104374	108634655	LOC108634655	Novel_lncRNA	102168649	NBN	0.950612	7.21e-06
TCONS_00104359	108634655	LOC108634655	Novel_lncRNA	102190095	SDK1	0.950625	7.2e-06
TCONS_00055359	102185932	ABHD12	Novel_lncRNA	102180516	C15H11orf42	0.950631	7.19e-06
TCONS_00104374	108634655	LOC108634655	Novel_lncRNA	108634775	LOC108634775	0.950637	7.19e-06
TCONS_00107034	XLOC_067998	XLOC_067998	Novel_lncRNA	102187187	IMMP2L	0.950643	7.19e-06
TCONS_00107456	XLOC_068302	XLOC_068302	Novel_lncRNA	102184378	MCF2L2	0.950646	7.18e-06
TCONS_00062851	102168651	PDGFD	Novel_lncRNA	102181635	FHIT	0.9507	7.15e-06
TCONS_00083277	102182265	C22H3orf67	Novel_lncRNA	XLOC_017040	XLOC_017040	0.950702	7.15e-06
TCONS_00014574	XLOC_009163	XLOC_009163	Novel_lncRNA	1485867	ND6	0.950711	7.14e-06
TCONS_00036044	108636534	LOC108636534	Novel_lncRNA	102180516	C15H11orf42	0.950712	7.14e-06
TCONS_00056769	102190335	SPAG1	Novel_lncRNA	102175089	CUTC	0.950712	7.14e-06
TCONS_00000861	102188353	HSPBAP1	Novel_lncRNA	108634775	LOC108634775	0.950727	7.13e-06
TCONS_00036044	108636534	LOC108636534	Novel_lncRNA	108635081	LOC108635081	0.950733	7.13e-06
TCONS_00107136	108635404	LOC108635404	Novel_lncRNA	102183948	STAP1	0.950736	7.13e-06
TCONS_00104874	108634747	LOC108634747	Novel_lncRNA	102190528	TDRD3	0.950736	7.13e-06
TCONS_00021890	102177417	LRP6	Novel_lncRNA	102178786	PPCS	0.950738	7.13e-06
XR_001917334.1	106503653	LOC106503653	Annotated_lncRNA	102170234	LOC102170234	0.95074	7.12e-06
TCONS_00021890	102177417	LRP6	Novel_lncRNA	102175089	CUTC	0.950741	7.12e-06
TCONS_00031267	XLOC_019976	XLOC_019976	Novel_lncRNA	102168484	EVA1C	0.950771	7.1e-06
TCONS_00063500	102187614	PLD5	Novel_lncRNA	XLOC_013256	XLOC_013256	0.950781	7.1e-06
TCONS_00105078	108634775	LOC108634775	Novel_lncRNA	102187187	IMMP2L	0.950788	7.09e-06
TCONS_00104890	108634747	LOC108634747	Novel_lncRNA	108636938	TRNAC-GCA	0.950797	7.09e-06
TCONS_00016399	102189827	CNOT4	Novel_lncRNA	XLOC_017040	XLOC_017040	0.950803	7.08e-06
TCONS_00107129	108635404	LOC108635404	Novel_lncRNA	102170234	LOC102170234	0.950804	7.08e-06
TCONS_00083277	102182265	C22H3orf67	Novel_lncRNA	102191622	CAMKMT	0.950811	7.08e-06
TCONS_00100203	102185993	ATP7A	Novel_lncRNA	102189074	ISL2	0.950818	7.07e-06
TCONS_00105602	108634845	LOC108634845	Novel_lncRNA	XLOC_019581	XLOC_019581	0.950829	7.07e-06
TCONS_00063500	102187614	PLD5	Novel_lncRNA	108637096	LOC108637096	0.950836	7.06e-06
TCONS_00010364	102178786	PPCS	Novel_lncRNA	108636938	TRNAC-GCA	0.950849	7.05e-06
TCONS_00104374	108634655	LOC108634655	Novel_lncRNA	XLOC_019581	XLOC_019581	0.950855	7.05e-06
TCONS_00105602	108634845	LOC108634845	Novel_lncRNA	102169186	LOC102169186	0.95086	7.05e-06
TCONS_00037564	102170234	LOC102170234	Novel_lncRNA	XLOC_001766	XLOC_001766	0.95087	7.04e-06
TCONS_00104874	108634747	LOC108634747	Novel_lncRNA	XLOC_043219	XLOC_043219	0.950877	7.04e-06
TCONS_00105602	108634845	LOC108634845	Novel_lncRNA	102174997	SUN3	0.950886	7.03e-06
TCONS_00079345	102171102	NIPBL	Novel_lncRNA	XLOC_022645	XLOC_022645	0.950889	7.03e-06
TCONS_00063500	102187614	PLD5	Novel_lncRNA	XLOC_060621	XLOC_060621	0.950901	7.02e-06
TCONS_00014574	XLOC_009163	XLOC_009163	Novel_lncRNA	XLOC_060054	XLOC_060054	0.950903	7.02e-06
TCONS_00010364	102178786	PPCS	Novel_lncRNA	XLOC_022645	XLOC_022645	0.950907	7.02e-06
TCONS_00083987	102172491	LANCL2	Novel_lncRNA	102180516	C15H11orf42	0.95091	7.02e-06
TCONS_00107093	XLOC_068035	XLOC_068035	Novel_lncRNA	108636938	TRNAC-GCA	0.95091	7.02e-06
TCONS_00000861	102188353	HSPBAP1	Novel_lncRNA	102188518	LOC102188518	0.950923	7.01e-06
TCONS_00063391	102169401	AHCTF1	Novel_lncRNA	108636938	TRNAC-GCA	0.950931	7e-06
TCONS_00018500	102179544	AHCYL2	Novel_lncRNA	102191614	GRIN3A	0.950934	7e-06
TCONS_00107136	108635404	LOC108635404	Novel_lncRNA	XLOC_025775	XLOC_025775	0.950961	6.98e-06
TCONS_00051432	XLOC_032990	XLOC_032990	Novel_lncRNA	XLOC_060621	XLOC_060621	0.950966	6.98e-06
TCONS_00026726	XLOC_017040	XLOC_017040	Novel_lncRNA	108634770	LOC108634770	0.950971	6.98e-06
TCONS_00098561	XLOC_062381	XLOC_062381	Novel_lncRNA	XLOC_029271	XLOC_029271	0.950975	6.97e-06
TCONS_00093961	102190578	GRK5	Novel_lncRNA	102190431	SGK2	0.950976	6.97e-06
TCONS_00027506	100861211	BMPR1B	Novel_lncRNA	108634774	LOC108634774	0.951006	6.96e-06
TCONS_00004634	102173974	DNAJC13	Novel_lncRNA	108634087	LOC108634087	0.951015	6.95e-06
TCONS_00063500	102187614	PLD5	Novel_lncRNA	102179748	OPHN1	0.951016	6.95e-06
TCONS_00063391	102169401	AHCTF1	Novel_lncRNA	102168890	ARID2	0.95102	6.95e-06
TCONS_00079345	102171102	NIPBL	Novel_lncRNA	108634775	LOC108634775	0.951023	6.94e-06
XR_001917334.1	106503653	LOC106503653	Annotated_lncRNA	102178628	MNAT1	0.951033	6.94e-06
TCONS_00098561	XLOC_062381	XLOC_062381	Novel_lncRNA	102169869	IFT74	0.951037	6.94e-06
TCONS_00083277	102182265	C22H3orf67	Novel_lncRNA	108635081	LOC108635081	0.951038	6.94e-06
TCONS_00104374	108634655	LOC108634655	Novel_lncRNA	102187187	IMMP2L	0.951039	6.93e-06
TCONS_00107136	108635404	LOC108635404	Novel_lncRNA	1485867	ND6	0.951044	6.93e-06
TCONS_00035964	102169005	SH3RF1	Novel_lncRNA	102191614	GRIN3A	0.951047	6.93e-06
TCONS_00017375	102185804	GNAI1	Novel_lncRNA	102178786	PPCS	0.951049	6.93e-06
TCONS_00107129	108635404	LOC108635404	Novel_lncRNA	108636938	TRNAC-GCA	0.951071	6.91e-06
TCONS_00106268	108635079	LOC108635079	Novel_lncRNA	XLOC_060621	XLOC_060621	0.951074	6.91e-06
TCONS_00098561	XLOC_062381	XLOC_062381	Novel_lncRNA	102187187	IMMP2L	0.951076	6.91e-06
TCONS_00063500	102187614	PLD5	Novel_lncRNA	XLOC_025773	XLOC_025773	0.951082	6.91e-06
TCONS_00063500	102187614	PLD5	Novel_lncRNA	106503310	LOC106503310	0.951084	6.91e-06
TCONS_00100203	102185993	ATP7A	Novel_lncRNA	102168616	CCSER1	0.951088	6.9e-06
TCONS_00046774	XLOC_030088	XLOC_030088	Novel_lncRNA	102168649	NBN	0.951097	6.9e-06
TCONS_00105074	108634776	LOC108634776	Novel_lncRNA	102186456	VWDE	0.95112	6.88e-06
TCONS_00025728	102176770	PPP3CA	Novel_lncRNA	108635303	LOC108635303	0.951127	6.88e-06
TCONS_00100202	102185993	ATP7A	Novel_lncRNA	102178628	MNAT1	0.951128	6.88e-06
TCONS_00098561	XLOC_062381	XLOC_062381	Novel_lncRNA	102185335	UMAD1	0.951148	6.87e-06
TCONS_00053185	102185098	PARD3	Novel_lncRNA	108636938	TRNAC-GCA	0.951156	6.86e-06
TCONS_00004634	102173974	DNAJC13	Novel_lncRNA	102188518	LOC102188518	0.951156	6.86e-06
TCONS_00062816	102169778	DCUN1D5	Novel_lncRNA	102190740	GTDC1	0.951208	6.83e-06
TCONS_00006446	102182546	C2H2orf76	Novel_lncRNA	108638412	LOC108638412	0.951234	6.81e-06
TCONS_00100202	102185993	ATP7A	Novel_lncRNA	108636938	TRNAC-GCA	0.951248	6.8e-06
TCONS_00106268	108635079	LOC108635079	Novel_lncRNA	XLOC_017040	XLOC_017040	0.951248	6.8e-06
TCONS_00079345	102171102	NIPBL	Novel_lncRNA	102171067	GDA	0.951258	6.8e-06
TCONS_00105665	XLOC_066994	XLOC_066994	Novel_lncRNA	XLOC_017040	XLOC_017040	0.951263	6.79e-06
XR_001917274.1	102171119	LOC102171119	Annotated_lncRNA	102169422	CCDC39	0.951266	6.79e-06
TCONS_00035962	102169005	SH3RF1	Novel_lncRNA	102191622	CAMKMT	0.951282	6.78e-06
TCONS_00051058	106502327	LOC106502327	Novel_lncRNA	102178628	MNAT1	0.951283	6.78e-06
TCONS_00104359	108634655	LOC108634655	Novel_lncRNA	XLOC_022645	XLOC_022645	0.951292	6.78e-06
TCONS_00045035	102175214	NEO1	Novel_lncRNA	102182242	FAM168A	0.951292	6.78e-06
TCONS_00105078	108634775	LOC108634775	Novel_lncRNA	XLOC_019581	XLOC_019581	0.951308	6.77e-06
TCONS_00104359	108634655	LOC108634655	Novel_lncRNA	XLOC_060621	XLOC_060621	0.951309	6.77e-06
TCONS_00051588	102191627	PCCA	Novel_lncRNA	102173909	LOC102173909	0.951333	6.75e-06
TCONS_00057890	102168649	NBN	Novel_lncRNA	102175089	CUTC	0.95134	6.75e-06
TCONS_00031267	XLOC_019976	XLOC_019976	Novel_lncRNA	102169752	SRFBP1	0.951342	6.75e-06
TCONS_00105068	108634775	LOC108634775	Novel_lncRNA	XLOC_004381	XLOC_004381	0.951353	6.74e-06
TCONS_00035964	102169005	SH3RF1	Novel_lncRNA	108636938	TRNAC-GCA	0.951357	6.74e-06
TCONS_00104890	108634747	LOC108634747	Novel_lncRNA	XLOC_017040	XLOC_017040	0.951359	6.74e-06
TCONS_00101125	108634335	SHROOM2	Novel_lncRNA	106502527	LOC106502527	0.951359	6.74e-06
TCONS_00049912	102181507	STRBP	Novel_lncRNA	102169005	SH3RF1	0.95137	6.73e-06
TCONS_00062165	102189776	PLEKHA7	Novel_lncRNA	102169752	SRFBP1	0.951376	6.73e-06
TCONS_00105068	108634775	LOC108634775	Novel_lncRNA	102171067	GDA	0.951386	6.72e-06
TCONS_00001068	102189992	P3H2	Novel_lncRNA	102180516	C15H11orf42	0.951387	6.72e-06
TCONS_00025728	102176770	PPP3CA	Novel_lncRNA	XLOC_038936	XLOC_038936	0.951429	6.69e-06
TCONS_00100381	102179748	OPHN1	Novel_lncRNA	102178786	PPCS	0.951431	6.69e-06
TCONS_00100202	102185993	ATP7A	Novel_lncRNA	108635081	LOC108635081	0.951434	6.69e-06
TCONS_00107093	XLOC_068035	XLOC_068035	Novel_lncRNA	102170234	LOC102170234	0.951435	6.69e-06
TCONS_00107136	108635404	LOC108635404	Novel_lncRNA	102181821	LOC102181821	0.951456	6.68e-06
TCONS_00063391	102169401	AHCTF1	Novel_lncRNA	XLOC_060621	XLOC_060621	0.951464	6.67e-06
TCONS_00101125	108634335	SHROOM2	Novel_lncRNA	108634233	LOC108634233	0.951465	6.67e-06
TCONS_00107136	108635404	LOC108635404	Novel_lncRNA	102185335	UMAD1	0.951477	6.66e-06
TCONS_00056769	102190335	SPAG1	Novel_lncRNA	102190431	SGK2	0.9515	6.65e-06
TCONS_00098561	XLOC_062381	XLOC_062381	Novel_lncRNA	102185014	KBTBD3	0.951501	6.65e-06
TCONS_00105078	108634775	LOC108634775	Novel_lncRNA	102169869	IFT74	0.951503	6.65e-06
TCONS_00098561	XLOC_062381	XLOC_062381	Novel_lncRNA	102180222	DOCK5	0.951524	6.64e-06
TCONS_00038362	102191138	PDSS2	Novel_lncRNA	108634774	LOC108634774	0.951539	6.63e-06
TCONS_00026726	XLOC_017040	XLOC_017040	Novel_lncRNA	108634774	LOC108634774	0.951557	6.62e-06
TCONS_00051432	XLOC_032990	XLOC_032990	Novel_lncRNA	XLOC_060963	XLOC_060963	0.951559	6.61e-06
TCONS_00104359	108634655	LOC108634655	Novel_lncRNA	102178786	PPCS	0.951563	6.61e-06
TCONS_00004691	102176274	ATP2C1	Novel_lncRNA	102186847	MKL1	0.951599	6.59e-06
TCONS_00062816	102169778	DCUN1D5	Novel_lncRNA	108634770	LOC108634770	0.951601	6.59e-06
TCONS_00078666	102182831	CCDC127	Novel_lncRNA	102171040	LOC102171040	0.951606	6.59e-06
TCONS_00100202	102185993	ATP7A	Novel_lncRNA	XLOC_060963	XLOC_060963	0.951612	6.58e-06
TCONS_00037564	102170234	LOC102170234	Novel_lncRNA	108636663	LOC108636663	0.951638	6.57e-06
TCONS_00105665	XLOC_066994	XLOC_066994	Novel_lncRNA	102186094	DEPDC4	0.951642	6.56e-06
TCONS_00106268	108635079	LOC108635079	Novel_lncRNA	102175089	CUTC	0.951642	6.56e-06
TCONS_00107136	108635404	LOC108635404	Novel_lncRNA	1485866	ND5	0.951643	6.56e-06
TCONS_00107456	XLOC_068302	XLOC_068302	Novel_lncRNA	108636916	LOC108636916	0.95165	6.56e-06
TCONS_00104874	108634747	LOC108634747	Novel_lncRNA	XLOC_011953	XLOC_011953	0.951657	6.56e-06
TCONS_00046774	XLOC_030088	XLOC_030088	Novel_lncRNA	XLOC_019581	XLOC_019581	0.95166	6.55e-06
TCONS_00004634	102173974	DNAJC13	Novel_lncRNA	102174621	LOC102174621	0.951661	6.55e-06
TCONS_00017375	102185804	GNAI1	Novel_lncRNA	106502527	LOC106502527	0.951668	6.55e-06
TCONS_00104357	108634655	LOC108634655	Novel_lncRNA	108636938	TRNAC-GCA	0.951672	6.55e-06
TCONS_00047284	102174942	PUM2	Novel_lncRNA	102181263	HDAC9	0.951693	6.53e-06
TCONS_00104359	108634655	LOC108634655	Novel_lncRNA	102187187	IMMP2L	0.951705	6.53e-06
TCONS_00107034	XLOC_067998	XLOC_067998	Novel_lncRNA	102188466	WASL	0.951711	6.52e-06
TCONS_00107129	108635404	LOC108635404	Novel_lncRNA	XLOC_017040	XLOC_017040	0.951724	6.51e-06
TCONS_00049912	102181507	STRBP	Novel_lncRNA	XLOC_062680	XLOC_062680	0.951728	6.51e-06
TCONS_00028876	102181389	FBXL17	Novel_lncRNA	102178786	PPCS	0.951741	6.5e-06
TCONS_00089728	102168225	MYO5B	Novel_lncRNA	102173098	LOC102173098	0.951753	6.5e-06
TCONS_00036044	108636534	LOC108636534	Novel_lncRNA	102188518	LOC102188518	0.951768	6.49e-06
TCONS_00105665	XLOC_066994	XLOC_066994	Novel_lncRNA	102168890	ARID2	0.951776	6.48e-06
TCONS_00079345	102171102	NIPBL	Novel_lncRNA	102169752	SRFBP1	0.951782	6.48e-06
TCONS_00037564	102170234	LOC102170234	Novel_lncRNA	XLOC_001768	XLOC_001768	0.951784	6.48e-06
TCONS_00006790	XLOC_004475	XLOC_004475	Novel_lncRNA	XLOC_060621	XLOC_060621	0.951787	6.48e-06
TCONS_00016399	102189827	CNOT4	Novel_lncRNA	XLOC_025775	XLOC_025775	0.951791	6.48e-06
TCONS_00035964	102169005	SH3RF1	Novel_lncRNA	102170234	LOC102170234	0.951802	6.47e-06
TCONS_00107136	108635404	LOC108635404	Novel_lncRNA	XLOC_019581	XLOC_019581	0.951805	6.47e-06
TCONS_00107034	XLOC_067998	XLOC_067998	Novel_lncRNA	XLOC_004381	XLOC_004381	0.951811	6.46e-06
TCONS_00105665	XLOC_066994	XLOC_066994	Novel_lncRNA	XLOC_054487	XLOC_054487	0.951827	6.45e-06
TCONS_00105068	108634775	LOC108634775	Novel_lncRNA	102175089	CUTC	0.951827	6.45e-06
TCONS_00104374	108634655	LOC108634655	Novel_lncRNA	102191622	CAMKMT	0.951845	6.44e-06
TCONS_00104374	108634655	LOC108634655	Novel_lncRNA	102174997	SUN3	0.951848	6.44e-06
TCONS_00056769	102190335	SPAG1	Novel_lncRNA	108636938	TRNAC-GCA	0.951862	6.43e-06
TCONS_00104357	108634655	LOC108634655	Novel_lncRNA	102170234	LOC102170234	0.951872	6.43e-06
TCONS_00017375	102185804	GNAI1	Novel_lncRNA	102177727	LOC102177727	0.95188	6.42e-06
TCONS_00063391	102169401	AHCTF1	Novel_lncRNA	102191622	CAMKMT	0.951892	6.42e-06
TCONS_00046774	XLOC_030088	XLOC_030088	Novel_lncRNA	102172461	ZNF623	0.951896	6.41e-06
TCONS_00105078	108634775	LOC108634775	Novel_lncRNA	102191622	CAMKMT	0.951897	6.41e-06
TCONS_00026726	XLOC_017040	XLOC_017040	Novel_lncRNA	108638412	LOC108638412	0.951901	6.41e-06
TCONS_00021890	102177417	LRP6	Novel_lncRNA	102172665	CWC27	0.951902	6.41e-06
TCONS_00083987	102172491	LANCL2	Novel_lncRNA	108634845	LOC108634845	0.951929	6.39e-06
TCONS_00063500	102187614	PLD5	Novel_lncRNA	108634087	LOC108634087	0.951938	6.39e-06
TCONS_00098561	XLOC_062381	XLOC_062381	Novel_lncRNA	1485866	ND5	0.951938	6.39e-06
TCONS_00105074	108634776	LOC108634776	Novel_lncRNA	XLOC_022645	XLOC_022645	0.951942	6.39e-06
TCONS_00078666	102182831	CCDC127	Novel_lncRNA	102173098	LOC102173098	0.951978	6.36e-06
TCONS_00026726	XLOC_017040	XLOC_017040	Novel_lncRNA	102174997	SUN3	0.951986	6.36e-06
TCONS_00107085	XLOC_068035	XLOC_068035	Novel_lncRNA	108636938	TRNAC-GCA	0.951996	6.35e-06
TCONS_00028890	102184717	EFNA5	Novel_lncRNA	108636938	TRNAC-GCA	0.951996	6.35e-06
TCONS_00101113	102189748	TBL1X	Novel_lncRNA	108636938	TRNAC-GCA	0.951996	6.35e-06
TCONS_00107086	XLOC_068035	XLOC_068035	Novel_lncRNA	108636938	TRNAC-GCA	0.951996	6.35e-06
TCONS_00107135	108635404	LOC108635404	Novel_lncRNA	108636938	TRNAC-GCA	0.951996	6.35e-06
TCONS_00107141	108635404	LOC108635404	Novel_lncRNA	108636938	TRNAC-GCA	0.951996	6.35e-06
TCONS_00059256	102187511	CELF1	Novel_lncRNA	108636938	TRNAC-GCA	0.951996	6.35e-06
TCONS_00062540	102174049	ZC3H12C	Novel_lncRNA	108636938	TRNAC-GCA	0.951996	6.35e-06
TCONS_00062935	102183894	PRELP	Novel_lncRNA	108636938	TRNAC-GCA	0.951996	6.35e-06
TCONS_00106358	XLOC_067486	XLOC_067486	Novel_lncRNA	108636938	TRNAC-GCA	0.951996	6.35e-06
TCONS_00010589	102174897	LOC102174897	Novel_lncRNA	108636938	TRNAC-GCA	0.951996	6.35e-06
TCONS_00078993	102174160	RNF180	Novel_lncRNA	108636938	TRNAC-GCA	0.951996	6.35e-06
TCONS_00078182	102169909	ARL15	Novel_lncRNA	108636938	TRNAC-GCA	0.951996	6.35e-06
TCONS_00079344	102171102	NIPBL	Novel_lncRNA	108636938	TRNAC-GCA	0.951996	6.35e-06
TCONS_00075436	XLOC_048175	XLOC_048175	Novel_lncRNA	108636938	TRNAC-GCA	0.951996	6.35e-06
TCONS_00034293	102186591	BNC2	Novel_lncRNA	108636938	TRNAC-GCA	0.951996	6.35e-06
TCONS_00036852	102183872	SHB	Novel_lncRNA	108636938	TRNAC-GCA	0.951996	6.35e-06
TCONS_00040550	102190605	CNKSR3	Novel_lncRNA	108636938	TRNAC-GCA	0.951996	6.35e-06
TCONS_00021876	102168517	DUSP16	Novel_lncRNA	108636938	TRNAC-GCA	0.951996	6.35e-06
TCONS_00057890	102168649	NBN	Novel_lncRNA	108638412	LOC108638412	0.951998	6.35e-06
TCONS_00106268	108635079	LOC108635079	Novel_lncRNA	XLOC_019581	XLOC_019581	0.95201	6.35e-06
TCONS_00055359	102185932	ABHD12	Novel_lncRNA	102173098	LOC102173098	0.952036	6.33e-06
TCONS_00046774	XLOC_030088	XLOC_030088	Novel_lncRNA	102178786	PPCS	0.952061	6.32e-06
TCONS_00100203	102185993	ATP7A	Novel_lncRNA	108635303	LOC108635303	0.952062	6.32e-06
TCONS_00107093	XLOC_068035	XLOC_068035	Novel_lncRNA	102191614	GRIN3A	0.952066	6.31e-06
TCONS_00105053	108634775	LOC108634775	Novel_lncRNA	102174689	CA10	0.952069	6.31e-06
TCONS_00100203	102185993	ATP7A	Novel_lncRNA	XLOC_013787	XLOC_013787	0.95208	6.3e-06
TCONS_00100202	102185993	ATP7A	Novel_lncRNA	102168890	ARID2	0.952096	6.3e-06
TCONS_00104357	108634655	LOC108634655	Novel_lncRNA	102191614	GRIN3A	0.952114	6.28e-06
TCONS_00025728	102176770	PPP3CA	Novel_lncRNA	102185335	UMAD1	0.952133	6.27e-06
TCONS_00105602	108634845	LOC108634845	Novel_lncRNA	102183148	MCC	0.95214	6.27e-06
TCONS_00037564	102170234	LOC102170234	Novel_lncRNA	102185335	UMAD1	0.952142	6.27e-06
TCONS_00106268	108635079	LOC108635079	Novel_lncRNA	102168649	NBN	0.952142	6.27e-06
TCONS_00063500	102187614	PLD5	Novel_lncRNA	108636938	TRNAC-GCA	0.952148	6.27e-06
TCONS_00101125	108634335	SHROOM2	Novel_lncRNA	102182306	RFX3	0.952155	6.26e-06
TCONS_00009736	XLOC_006211	XLOC_006211	Novel_lncRNA	XLOC_060621	XLOC_060621	0.952173	6.25e-06
TCONS_00046774	XLOC_030088	XLOC_030088	Novel_lncRNA	102174997	SUN3	0.952184	6.24e-06
TCONS_00048653	102180678	MAP4K3	Novel_lncRNA	102189948	LOC102189948	0.952191	6.24e-06
XR_001917274.1	102171119	LOC102171119	Annotated_lncRNA	102191105	SDHAF3	0.952191	6.24e-06
TCONS_00107085	XLOC_068035	XLOC_068035	Novel_lncRNA	102170234	LOC102170234	0.952192	6.24e-06
TCONS_00028890	102184717	EFNA5	Novel_lncRNA	102170234	LOC102170234	0.952192	6.24e-06
TCONS_00101113	102189748	TBL1X	Novel_lncRNA	102170234	LOC102170234	0.952192	6.24e-06
TCONS_00107086	XLOC_068035	XLOC_068035	Novel_lncRNA	102170234	LOC102170234	0.952192	6.24e-06
TCONS_00107135	108635404	LOC108635404	Novel_lncRNA	102170234	LOC102170234	0.952192	6.24e-06
TCONS_00107141	108635404	LOC108635404	Novel_lncRNA	102170234	LOC102170234	0.952192	6.24e-06
TCONS_00059256	102187511	CELF1	Novel_lncRNA	102170234	LOC102170234	0.952192	6.24e-06
TCONS_00062540	102174049	ZC3H12C	Novel_lncRNA	102170234	LOC102170234	0.952192	6.24e-06
TCONS_00062935	102183894	PRELP	Novel_lncRNA	102170234	LOC102170234	0.952192	6.24e-06
TCONS_00106358	XLOC_067486	XLOC_067486	Novel_lncRNA	102170234	LOC102170234	0.952192	6.24e-06
TCONS_00010589	102174897	LOC102174897	Novel_lncRNA	102170234	LOC102170234	0.952192	6.24e-06
TCONS_00078993	102174160	RNF180	Novel_lncRNA	102170234	LOC102170234	0.952192	6.24e-06
TCONS_00078182	102169909	ARL15	Novel_lncRNA	102170234	LOC102170234	0.952192	6.24e-06
TCONS_00079344	102171102	NIPBL	Novel_lncRNA	102170234	LOC102170234	0.952192	6.24e-06
TCONS_00075436	XLOC_048175	XLOC_048175	Novel_lncRNA	102170234	LOC102170234	0.952192	6.24e-06
TCONS_00034293	102186591	BNC2	Novel_lncRNA	102170234	LOC102170234	0.952192	6.24e-06
TCONS_00036852	102183872	SHB	Novel_lncRNA	102170234	LOC102170234	0.952192	6.24e-06
TCONS_00040550	102190605	CNKSR3	Novel_lncRNA	102170234	LOC102170234	0.952192	6.24e-06
TCONS_00021876	102168517	DUSP16	Novel_lncRNA	102170234	LOC102170234	0.952192	6.24e-06
TCONS_00063500	102187614	PLD5	Novel_lncRNA	102170123	LOC102170123	0.952199	6.24e-06
TCONS_00105068	108634775	LOC108634775	Novel_lncRNA	102189948	LOC102189948	0.952202	6.23e-06
TCONS_00045035	102175214	NEO1	Novel_lncRNA	102171040	LOC102171040	0.952209	6.23e-06
TCONS_00049912	102181507	STRBP	Novel_lncRNA	XLOC_000557	XLOC_000557	0.95221	6.23e-06
TCONS_00046774	XLOC_030088	XLOC_030088	Novel_lncRNA	XLOC_046524	XLOC_046524	0.952218	6.22e-06
TCONS_00037564	102170234	LOC102170234	Novel_lncRNA	102169024	GPC5	0.952227	6.22e-06
TCONS_00046774	XLOC_030088	XLOC_030088	Novel_lncRNA	108634775	LOC108634775	0.952227	6.22e-06
TCONS_00002588	XLOC_001767	XLOC_001767	Novel_lncRNA	102182306	RFX3	0.952236	6.21e-06
TCONS_00018500	102179544	AHCYL2	Novel_lncRNA	108638412	LOC108638412	0.952254	6.2e-06
TCONS_00107074	XLOC_068033	XLOC_068033	Novel_lncRNA	102182831	CCDC127	0.952259	6.2e-06
TCONS_00098561	XLOC_062381	XLOC_062381	Novel_lncRNA	108636916	LOC108636916	0.952261	6.2e-06
TCONS_00105602	108634845	LOC108634845	Novel_lncRNA	108635081	LOC108635081	0.952264	6.2e-06
TCONS_00016399	102189827	CNOT4	Novel_lncRNA	100861211	BMPR1B	0.952278	6.19e-06
TCONS_00051432	XLOC_032990	XLOC_032990	Novel_lncRNA	102183148	MCC	0.952298	6.18e-06
TCONS_00063500	102187614	PLD5	Novel_lncRNA	108635964	TRNAC-GCA	0.9523	6.18e-06
TCONS_00105078	108634775	LOC108634775	Novel_lncRNA	102178786	PPCS	0.952306	6.17e-06
TCONS_00100203	102185993	ATP7A	Novel_lncRNA	102181635	FHIT	0.952313	6.17e-06
TCONS_00038362	102191138	PDSS2	Novel_lncRNA	102175089	CUTC	0.952315	6.17e-06
TCONS_00049912	102181507	STRBP	Novel_lncRNA	102182635	CATSPERB	0.95232	6.17e-06
TCONS_00035962	102169005	SH3RF1	Novel_lncRNA	102169752	SRFBP1	0.952334	6.16e-06
TCONS_00083103	102178670	MAGI1	Novel_lncRNA	102178628	MNAT1	0.952338	6.16e-06
TCONS_00100381	102179748	OPHN1	Novel_lncRNA	102168890	ARID2	0.952338	6.16e-06
TCONS_00056769	102190335	SPAG1	Novel_lncRNA	102185014	KBTBD3	0.952339	6.16e-06
TCONS_00078666	102182831	CCDC127	Novel_lncRNA	102172665	CWC27	0.952342	6.15e-06
TCONS_00051058	106502327	LOC106502327	Novel_lncRNA	102178302	CFAP52	0.95235	6.15e-06
TCONS_00107085	XLOC_068035	XLOC_068035	Novel_lncRNA	102191614	GRIN3A	0.952353	6.15e-06
TCONS_00028890	102184717	EFNA5	Novel_lncRNA	102191614	GRIN3A	0.952353	6.15e-06
TCONS_00101113	102189748	TBL1X	Novel_lncRNA	102191614	GRIN3A	0.952353	6.15e-06
TCONS_00107086	XLOC_068035	XLOC_068035	Novel_lncRNA	102191614	GRIN3A	0.952353	6.15e-06
TCONS_00107135	108635404	LOC108635404	Novel_lncRNA	102191614	GRIN3A	0.952353	6.15e-06
TCONS_00107141	108635404	LOC108635404	Novel_lncRNA	102191614	GRIN3A	0.952353	6.15e-06
TCONS_00059256	102187511	CELF1	Novel_lncRNA	102191614	GRIN3A	0.952353	6.15e-06
TCONS_00062540	102174049	ZC3H12C	Novel_lncRNA	102191614	GRIN3A	0.952353	6.15e-06
TCONS_00062935	102183894	PRELP	Novel_lncRNA	102191614	GRIN3A	0.952353	6.15e-06
TCONS_00106358	XLOC_067486	XLOC_067486	Novel_lncRNA	102191614	GRIN3A	0.952353	6.15e-06
TCONS_00010589	102174897	LOC102174897	Novel_lncRNA	102191614	GRIN3A	0.952353	6.15e-06
TCONS_00078993	102174160	RNF180	Novel_lncRNA	102191614	GRIN3A	0.952353	6.15e-06
TCONS_00078182	102169909	ARL15	Novel_lncRNA	102191614	GRIN3A	0.952353	6.15e-06
TCONS_00079344	102171102	NIPBL	Novel_lncRNA	102191614	GRIN3A	0.952353	6.15e-06
TCONS_00075436	XLOC_048175	XLOC_048175	Novel_lncRNA	102191614	GRIN3A	0.952353	6.15e-06
TCONS_00034293	102186591	BNC2	Novel_lncRNA	102191614	GRIN3A	0.952353	6.15e-06
TCONS_00036852	102183872	SHB	Novel_lncRNA	102191614	GRIN3A	0.952353	6.15e-06
TCONS_00040550	102190605	CNKSR3	Novel_lncRNA	102191614	GRIN3A	0.952353	6.15e-06
TCONS_00021876	102168517	DUSP16	Novel_lncRNA	102191614	GRIN3A	0.952353	6.15e-06
TCONS_00063391	102169401	AHCTF1	Novel_lncRNA	XLOC_017040	XLOC_017040	0.952374	6.14e-06
TCONS_00107074	XLOC_068033	XLOC_068033	Novel_lncRNA	102183948	STAP1	0.95238	6.13e-06
TCONS_00053185	102185098	PARD3	Novel_lncRNA	102185014	KBTBD3	0.952385	6.13e-06
TCONS_00004634	102173974	DNAJC13	Novel_lncRNA	102185014	KBTBD3	0.952404	6.12e-06
TCONS_00017375	102185804	GNAI1	Novel_lncRNA	108635242	LOC108635242	0.952411	6.11e-06
TCONS_00083277	102182265	C22H3orf67	Novel_lncRNA	108634233	LOC108634233	0.952418	6.11e-06
TCONS_00018500	102179544	AHCYL2	Novel_lncRNA	102185014	KBTBD3	0.952421	6.11e-06
TCONS_00025728	102176770	PPP3CA	Novel_lncRNA	102180222	DOCK5	0.952435	6.1e-06
TCONS_00027506	100861211	BMPR1B	Novel_lncRNA	108636938	TRNAC-GCA	0.952435	6.1e-06
TCONS_00083440	102182642	NT5DC2	Novel_lncRNA	102172665	CWC27	0.952437	6.1e-06
TCONS_00107034	XLOC_067998	XLOC_067998	Novel_lncRNA	XLOC_060621	XLOC_060621	0.95244	6.1e-06
TCONS_00025728	102176770	PPP3CA	Novel_lncRNA	102182306	RFX3	0.952442	6.1e-06
TCONS_00004634	102173974	DNAJC13	Novel_lncRNA	102169186	LOC102169186	0.952457	6.09e-06
TCONS_00051058	106502327	LOC106502327	Novel_lncRNA	102168649	NBN	0.952473	6.08e-06
TCONS_00056769	102190335	SPAG1	Novel_lncRNA	102170234	LOC102170234	0.952473	6.08e-06
TCONS_00107089	XLOC_068035	XLOC_068035	Novel_lncRNA	108636938	TRNAC-GCA	0.952479	6.08e-06
TCONS_00046774	XLOC_030088	XLOC_030088	Novel_lncRNA	XLOC_022645	XLOC_022645	0.952479	6.08e-06
TCONS_00027506	100861211	BMPR1B	Novel_lncRNA	102175089	CUTC	0.952491	6.07e-06
TCONS_00062165	102189776	PLEKHA7	Novel_lncRNA	XLOC_022645	XLOC_022645	0.952511	6.06e-06
TCONS_00104874	108634747	LOC108634747	Novel_lncRNA	102173013	FBXO11	0.952513	6.06e-06
TCONS_00038362	102191138	PDSS2	Novel_lncRNA	102182306	RFX3	0.952516	6.05e-06
TCONS_00105665	XLOC_066994	XLOC_066994	Novel_lncRNA	XLOC_026682	XLOC_026682	0.952521	6.05e-06
TCONS_00049912	102181507	STRBP	Novel_lncRNA	106503310	LOC106503310	0.952534	6.04e-06
TCONS_00100203	102185993	ATP7A	Novel_lncRNA	108634770	LOC108634770	0.95254	6.04e-06
TCONS_00028876	102181389	FBXL17	Novel_lncRNA	XLOC_054487	XLOC_054487	0.952542	6.04e-06
TCONS_00046774	XLOC_030088	XLOC_030088	Novel_lncRNA	102187187	IMMP2L	0.95255	6.04e-06
TCONS_00104874	108634747	LOC108634747	Novel_lncRNA	102189948	LOC102189948	0.952551	6.03e-06
TCONS_00107034	XLOC_067998	XLOC_067998	Novel_lncRNA	102172665	CWC27	0.952562	6.03e-06
TCONS_00062851	102168651	PDGFD	Novel_lncRNA	102170740	CMTM8	0.952567	6.03e-06
TCONS_00014574	XLOC_009163	XLOC_009163	Novel_lncRNA	XLOC_060621	XLOC_060621	0.952569	6.02e-06
TCONS_00019805	102178594	ANKIB1	Novel_lncRNA	1485866	ND5	0.952584	6.02e-06
TCONS_00004691	102176274	ATP2C1	Novel_lncRNA	102185014	KBTBD3	0.952586	6.01e-06
TCONS_00038362	102191138	PDSS2	Novel_lncRNA	102178302	CFAP52	0.9526	6.01e-06
TCONS_00051588	102191627	PCCA	Novel_lncRNA	108635301	LOC108635301	0.952617	6e-06
TCONS_00004634	102173974	DNAJC13	Novel_lncRNA	102185335	UMAD1	0.952631	5.99e-06
TCONS_00048653	102180678	MAP4K3	Novel_lncRNA	102190528	TDRD3	0.952636	5.99e-06
TCONS_00071133	102173960	DNAJA2	Novel_lncRNA	102174689	CA10	0.952656	5.98e-06
TCONS_00100202	102185993	ATP7A	Novel_lncRNA	102170234	LOC102170234	0.952659	5.97e-06
TCONS_00062165	102189776	PLEKHA7	Novel_lncRNA	102178628	MNAT1	0.952661	5.97e-06
TCONS_00004634	102173974	DNAJC13	Novel_lncRNA	108634746	LOC108634746	0.952661	5.97e-06
TCONS_00031267	XLOC_019976	XLOC_019976	Novel_lncRNA	108636534	LOC108636534	0.952673	5.97e-06
TCONS_00107074	XLOC_068033	XLOC_068033	Novel_lncRNA	XLOC_063549	XLOC_063549	0.952677	5.96e-06
TCONS_00002588	XLOC_001767	XLOC_001767	Novel_lncRNA	108634233	LOC108634233	0.952685	5.96e-06
TCONS_00049912	102181507	STRBP	Novel_lncRNA	XLOC_017040	XLOC_017040	0.952693	5.96e-06
TCONS_00100202	102185993	ATP7A	Novel_lncRNA	102169869	IFT74	0.952707	5.95e-06
TCONS_00025728	102176770	PPP3CA	Novel_lncRNA	102179748	OPHN1	0.952712	5.94e-06
TCONS_00025728	102176770	PPP3CA	Novel_lncRNA	102188148	PLCB1	0.952716	5.94e-06
TCONS_00105602	108634845	LOC108634845	Novel_lncRNA	102181443	INO80D	0.952722	5.94e-06
TCONS_00107456	XLOC_068302	XLOC_068302	Novel_lncRNA	108635242	LOC108635242	0.95273	5.93e-06
TCONS_00063500	102187614	PLD5	Novel_lncRNA	102190888	MACROD2	0.952735	5.93e-06
TCONS_00083103	102178670	MAGI1	Novel_lncRNA	108634774	LOC108634774	0.95274	5.93e-06
TCONS_00063500	102187614	PLD5	Novel_lncRNA	102171417	LOC102171417	0.952747	5.93e-06
TCONS_00049912	102181507	STRBP	Novel_lncRNA	108634032	LOC108634032	0.952751	5.92e-06
TCONS_00014574	XLOC_009163	XLOC_009163	Novel_lncRNA	XLOC_054487	XLOC_054487	0.952752	5.92e-06
TCONS_00026726	XLOC_017040	XLOC_017040	Novel_lncRNA	102175089	CUTC	0.952753	5.92e-06
TCONS_00105602	108634845	LOC108634845	Novel_lncRNA	102185335	UMAD1	0.952756	5.92e-06
TCONS_00017375	102185804	GNAI1	Novel_lncRNA	102170740	CMTM8	0.952761	5.92e-06
TCONS_00107456	XLOC_068302	XLOC_068302	Novel_lncRNA	102191614	GRIN3A	0.952776	5.91e-06
TCONS_00051432	XLOC_032990	XLOC_032990	Novel_lncRNA	102170234	LOC102170234	0.952782	5.91e-06
TCONS_00014574	XLOC_009163	XLOC_009163	Novel_lncRNA	102170740	CMTM8	0.952784	5.9e-06
TCONS_00100202	102185993	ATP7A	Novel_lncRNA	102186094	DEPDC4	0.952795	5.9e-06
TCONS_00083440	102182642	NT5DC2	Novel_lncRNA	108638412	LOC108638412	0.952805	5.89e-06
TCONS_00062816	102169778	DCUN1D5	Novel_lncRNA	102169186	LOC102169186	0.952805	5.89e-06
TCONS_00045035	102175214	NEO1	Novel_lncRNA	108634770	LOC108634770	0.952806	5.89e-06
TCONS_00025728	102176770	PPP3CA	Novel_lncRNA	XLOC_026682	XLOC_026682	0.952843	5.87e-06
TCONS_00107093	XLOC_068035	XLOC_068035	Novel_lncRNA	102178786	PPCS	0.952859	5.86e-06
TCONS_00017375	102185804	GNAI1	Novel_lncRNA	102174689	CA10	0.952863	5.86e-06
TCONS_00016399	102189827	CNOT4	Novel_lncRNA	XLOC_019581	XLOC_019581	0.952866	5.86e-06
TCONS_00071133	102173960	DNAJA2	Novel_lncRNA	102168890	ARID2	0.95287	5.86e-06
TCONS_00063500	102187614	PLD5	Novel_lncRNA	102173098	LOC102173098	0.952886	5.85e-06
TCONS_00047284	102174942	PUM2	Novel_lncRNA	XLOC_038940	XLOC_038940	0.952903	5.84e-06
TCONS_00002588	XLOC_001767	XLOC_001767	Novel_lncRNA	102172461	ZNF623	0.952912	5.83e-06
TCONS_00001068	102189992	P3H2	Novel_lncRNA	102186094	DEPDC4	0.952918	5.83e-06
TCONS_00105068	108634775	LOC108634775	Novel_lncRNA	102190528	TDRD3	0.952923	5.83e-06
TCONS_00107136	108635404	LOC108635404	Novel_lncRNA	102188518	LOC102188518	0.952931	5.82e-06
TCONS_00107074	XLOC_068033	XLOC_068033	Novel_lncRNA	102176734	LOC102176734	0.952937	5.82e-06
TCONS_00049912	102181507	STRBP	Novel_lncRNA	102172314	LOC102172314	0.952951	5.81e-06
TCONS_00006446	102182546	C2H2orf76	Novel_lncRNA	1485866	ND5	0.95296	5.81e-06
TCONS_00037564	102170234	LOC102170234	Novel_lncRNA	102179748	OPHN1	0.952982	5.8e-06
TCONS_00098561	XLOC_062381	XLOC_062381	Novel_lncRNA	102190528	TDRD3	0.952989	5.79e-06
TCONS_00079345	102171102	NIPBL	Novel_lncRNA	XLOC_017040	XLOC_017040	0.95299	5.79e-06
TCONS_00053185	102185098	PARD3	Novel_lncRNA	102191614	GRIN3A	0.953	5.79e-06
TCONS_00010364	102178786	PPCS	Novel_lncRNA	102190095	SDK1	0.953008	5.78e-06
XR_001917274.1	102171119	LOC102171119	Annotated_lncRNA	XLOC_004381	XLOC_004381	0.953008	5.78e-06
TCONS_00107089	XLOC_068035	XLOC_068035	Novel_lncRNA	102170234	LOC102170234	0.953017	5.78e-06
TCONS_00107034	XLOC_067998	XLOC_067998	Novel_lncRNA	XLOC_017040	XLOC_017040	0.953018	5.78e-06
TCONS_00101125	108634335	SHROOM2	Novel_lncRNA	102174997	SUN3	0.953043	5.76e-06
TCONS_00046774	XLOC_030088	XLOC_030088	Novel_lncRNA	102188518	LOC102188518	0.953048	5.76e-06
TCONS_00006446	102182546	C2H2orf76	Novel_lncRNA	102173098	LOC102173098	0.953058	5.75e-06
TCONS_00079345	102171102	NIPBL	Novel_lncRNA	102185335	UMAD1	0.953061	5.75e-06
TCONS_00105602	108634845	LOC108634845	Novel_lncRNA	102190740	GTDC1	0.953079	5.74e-06
TCONS_00006446	102182546	C2H2orf76	Novel_lncRNA	102180516	C15H11orf42	0.95308	5.74e-06
TCONS_00049912	102181507	STRBP	Novel_lncRNA	102190528	TDRD3	0.953102	5.73e-06
TCONS_00107074	XLOC_068033	XLOC_068033	Novel_lncRNA	102172665	CWC27	0.953112	5.73e-06
TCONS_00107089	XLOC_068035	XLOC_068035	Novel_lncRNA	102191614	GRIN3A	0.953121	5.72e-06
TCONS_00100203	102185993	ATP7A	Novel_lncRNA	108634846	LOC108634846	0.953124	5.72e-06
TCONS_00107034	XLOC_067998	XLOC_067998	Novel_lncRNA	102190528	TDRD3	0.953126	5.72e-06
TCONS_00105053	108634775	LOC108634775	Novel_lncRNA	102191622	CAMKMT	0.95314	5.71e-06
TCONS_00026726	XLOC_017040	XLOC_017040	Novel_lncRNA	108636534	LOC108636534	0.953145	5.71e-06
TCONS_00100203	102185993	ATP7A	Novel_lncRNA	102187187	IMMP2L	0.953146	5.71e-06
TCONS_00037564	102170234	LOC102170234	Novel_lncRNA	XLOC_017694	XLOC_017694	0.953152	5.7e-06
TCONS_00014574	XLOC_009163	XLOC_009163	Novel_lncRNA	102168616	CCSER1	0.953157	5.7e-06
TCONS_00002588	XLOC_001767	XLOC_001767	Novel_lncRNA	108634776	LOC108634776	0.953159	5.7e-06
TCONS_00037564	102170234	LOC102170234	Novel_lncRNA	102182559	ST6GALNAC5	0.953166	5.7e-06
TCONS_00019805	102178594	ANKIB1	Novel_lncRNA	102171040	LOC102171040	0.953166	5.7e-06
TCONS_00068368	102177553	ANAPC10	Novel_lncRNA	108638412	LOC108638412	0.953178	5.69e-06
TCONS_00049912	102181507	STRBP	Novel_lncRNA	106502976	NPHP4	0.953209	5.67e-06
TCONS_00048653	102180678	MAP4K3	Novel_lncRNA	108635301	LOC108635301	0.953219	5.67e-06
TCONS_00007312	102186529	FAM171B	Novel_lncRNA	102190528	TDRD3	0.953226	5.66e-06
TCONS_00007312	102186529	FAM171B	Novel_lncRNA	108635301	LOC108635301	0.953228	5.66e-06
TCONS_00100203	102185993	ATP7A	Novel_lncRNA	XLOC_029271	XLOC_029271	0.953232	5.66e-06
TCONS_00100381	102179748	OPHN1	Novel_lncRNA	108634774	LOC108634774	0.953234	5.66e-06
TCONS_00079345	102171102	NIPBL	Novel_lncRNA	XLOC_004381	XLOC_004381	0.953242	5.66e-06
TCONS_00010364	102178786	PPCS	Novel_lncRNA	102178786	PPCS	0.953248	5.65e-06
TCONS_00000861	102188353	HSPBAP1	Novel_lncRNA	108634776	LOC108634776	0.953265	5.64e-06
TCONS_00036044	108636534	LOC108636534	Novel_lncRNA	XLOC_060054	XLOC_060054	0.95327	5.64e-06
TCONS_00062851	102168651	PDGFD	Novel_lncRNA	102168616	CCSER1	0.953274	5.64e-06
TCONS_00100203	102185993	ATP7A	Novel_lncRNA	102183948	STAP1	0.953277	5.64e-06
TCONS_00049912	102181507	STRBP	Novel_lncRNA	102185346	ARL13A	0.95331	5.62e-06
TCONS_00049912	102181507	STRBP	Novel_lncRNA	102187210	CPT1B	0.953311	5.62e-06
TCONS_00100202	102185993	ATP7A	Novel_lncRNA	102191622	CAMKMT	0.953318	5.61e-06
TCONS_00062165	102189776	PLEKHA7	Novel_lncRNA	108634775	LOC108634775	0.953353	5.6e-06
TCONS_00036044	108636534	LOC108636534	Novel_lncRNA	102186456	VWDE	0.953355	5.59e-06
TCONS_00104374	108634655	LOC108634655	Novel_lncRNA	XLOC_046524	XLOC_046524	0.953358	5.59e-06
TCONS_00048653	102180678	MAP4K3	Novel_lncRNA	102169752	SRFBP1	0.953361	5.59e-06
TCONS_00063500	102187614	PLD5	Novel_lncRNA	102169005	SH3RF1	0.953366	5.59e-06
TCONS_00051058	106502327	LOC106502327	Novel_lncRNA	102169752	SRFBP1	0.953369	5.59e-06
TCONS_00062165	102189776	PLEKHA7	Novel_lncRNA	102172461	ZNF623	0.953371	5.59e-06
TCONS_00025728	102176770	PPP3CA	Novel_lncRNA	102183387	LOC102183387	0.953384	5.58e-06
TCONS_00051058	106502327	LOC106502327	Novel_lncRNA	102170234	LOC102170234	0.953384	5.58e-06
TCONS_00105078	108634775	LOC108634775	Novel_lncRNA	XLOC_060621	XLOC_060621	0.953396	5.57e-06
TCONS_00107456	XLOC_068302	XLOC_068302	Novel_lncRNA	102185335	UMAD1	0.953426	5.56e-06
TCONS_00105068	108634775	LOC108634775	Novel_lncRNA	XLOC_060621	XLOC_060621	0.953439	5.55e-06
TCONS_00071133	102173960	DNAJA2	Novel_lncRNA	XLOC_046524	XLOC_046524	0.953445	5.55e-06
TCONS_00057890	102168649	NBN	Novel_lncRNA	108635301	LOC108635301	0.953445	5.55e-06
TCONS_00026726	XLOC_017040	XLOC_017040	Novel_lncRNA	102190528	TDRD3	0.953465	5.54e-06
TCONS_00098561	XLOC_062381	XLOC_062381	Novel_lncRNA	102179544	AHCYL2	0.953469	5.53e-06
TCONS_00038362	102191138	PDSS2	Novel_lncRNA	102168890	ARID2	0.95348	5.53e-06
TCONS_00037564	102170234	LOC102170234	Novel_lncRNA	102169869	IFT74	0.953482	5.53e-06
TCONS_00009736	XLOC_006211	XLOC_006211	Novel_lncRNA	102181263	HDAC9	0.953488	5.52e-06
TCONS_00009736	XLOC_006211	XLOC_006211	Novel_lncRNA	102178048	NOX1	0.953488	5.52e-06
TCONS_00104874	108634747	LOC108634747	Novel_lncRNA	XLOC_017040	XLOC_017040	0.953493	5.52e-06
TCONS_00002588	XLOC_001767	XLOC_001767	Novel_lncRNA	102185014	KBTBD3	0.9535	5.52e-06
TCONS_00035962	102169005	SH3RF1	Novel_lncRNA	102175089	CUTC	0.953508	5.51e-06
TCONS_00036044	108636534	LOC108636534	Novel_lncRNA	102171040	LOC102171040	0.953509	5.51e-06
TCONS_00035964	102169005	SH3RF1	Novel_lncRNA	102178786	PPCS	0.953515	5.51e-06
TCONS_00063500	102187614	PLD5	Novel_lncRNA	108635155	LOC108635155	0.953515	5.51e-06
TCONS_00028876	102181389	FBXL17	Novel_lncRNA	102168890	ARID2	0.953518	5.51e-06
TCONS_00107074	XLOC_068033	XLOC_068033	Novel_lncRNA	108636663	LOC108636663	0.953526	5.5e-06
TCONS_00107074	XLOC_068033	XLOC_068033	Novel_lncRNA	XLOC_025775	XLOC_025775	0.953544	5.49e-06
TCONS_00026726	XLOC_017040	XLOC_017040	Novel_lncRNA	102171067	GDA	0.953551	5.49e-06
TCONS_00063500	102187614	PLD5	Novel_lncRNA	106502810	LOC106502810	0.953563	5.48e-06
TCONS_00098561	XLOC_062381	XLOC_062381	Novel_lncRNA	102191622	CAMKMT	0.953563	5.48e-06
TCONS_00104890	108634747	LOC108634747	Novel_lncRNA	102183148	MCC	0.953573	5.48e-06
TCONS_00105665	XLOC_066994	XLOC_066994	Novel_lncRNA	102175089	CUTC	0.953596	5.47e-06
TCONS_00107089	XLOC_068035	XLOC_068035	Novel_lncRNA	108635081	LOC108635081	0.953605	5.46e-06
TCONS_00107129	108635404	LOC108635404	Novel_lncRNA	102183148	MCC	0.953607	5.46e-06
TCONS_00107456	XLOC_068302	XLOC_068302	Novel_lncRNA	106502021	MAGI2	0.95362	5.45e-06
TCONS_00068368	102177553	ANAPC10	Novel_lncRNA	102173098	LOC102173098	0.953622	5.45e-06
TCONS_00006790	XLOC_004475	XLOC_004475	Novel_lncRNA	102186094	DEPDC4	0.953622	5.45e-06
TCONS_00063500	102187614	PLD5	Novel_lncRNA	XLOC_029998	XLOC_029998	0.953628	5.45e-06
XR_001917334.1	106503653	LOC106503653	Annotated_lncRNA	102175089	CUTC	0.953637	5.45e-06
TCONS_00062816	102169778	DCUN1D5	Novel_lncRNA	102183948	STAP1	0.953637	5.45e-06
TCONS_00063500	102187614	PLD5	Novel_lncRNA	102176235	MSRA	0.953695	5.42e-06
TCONS_00010364	102178786	PPCS	Novel_lncRNA	108634233	LOC108634233	0.95371	5.41e-06
TCONS_00027506	100861211	BMPR1B	Novel_lncRNA	XLOC_046524	XLOC_046524	0.953713	5.41e-06
TCONS_00107136	108635404	LOC108635404	Novel_lncRNA	XLOC_011953	XLOC_011953	0.953713	5.41e-06
TCONS_00100203	102185993	ATP7A	Novel_lncRNA	102185014	KBTBD3	0.953717	5.4e-06
XR_001917334.1	106503653	LOC106503653	Annotated_lncRNA	XLOC_022645	XLOC_022645	0.953722	5.4e-06
TCONS_00006790	XLOC_004475	XLOC_004475	Novel_lncRNA	108636938	TRNAC-GCA	0.953733	5.4e-06
TCONS_00062851	102168651	PDGFD	Novel_lncRNA	XLOC_060621	XLOC_060621	0.953736	5.4e-06
TCONS_00097124	102188740	VCL	Novel_lncRNA	102171040	LOC102171040	0.953758	5.38e-06
TCONS_00006790	XLOC_004475	XLOC_004475	Novel_lncRNA	102191614	GRIN3A	0.953765	5.38e-06
TCONS_00035962	102169005	SH3RF1	Novel_lncRNA	102172665	CWC27	0.953768	5.38e-06
TCONS_00049912	102181507	STRBP	Novel_lncRNA	102168514	LOC102168514	0.95377	5.38e-06
TCONS_00062851	102168651	PDGFD	Novel_lncRNA	XLOC_028036	XLOC_028036	0.953771	5.38e-06
TCONS_00025728	102176770	PPP3CA	Novel_lncRNA	108636534	LOC108636534	0.95378	5.37e-06
XR_001917334.1	106503653	LOC106503653	Annotated_lncRNA	102168649	NBN	0.953793	5.37e-06
TCONS_00105665	XLOC_066994	XLOC_066994	Novel_lncRNA	102170740	CMTM8	0.9538	5.36e-06
TCONS_00105602	108634845	LOC108634845	Novel_lncRNA	106502527	LOC106502527	0.953801	5.36e-06
TCONS_00009331	102188539	ITGB6	Novel_lncRNA	102173098	LOC102173098	0.953823	5.35e-06
TCONS_00006790	XLOC_004475	XLOC_004475	Novel_lncRNA	108635081	LOC108635081	0.953827	5.35e-06
TCONS_00100202	102185993	ATP7A	Novel_lncRNA	102175089	CUTC	0.953832	5.35e-06
TCONS_00062816	102169778	DCUN1D5	Novel_lncRNA	102184378	MCF2L2	0.953836	5.34e-06
TCONS_00031267	XLOC_019976	XLOC_019976	Novel_lncRNA	102181263	HDAC9	0.953853	5.33e-06
TCONS_00004691	102176274	ATP2C1	Novel_lncRNA	XLOC_004381	XLOC_004381	0.953862	5.33e-06
TCONS_00002588	XLOC_001767	XLOC_001767	Novel_lncRNA	102169752	SRFBP1	0.953864	5.33e-06
TCONS_00049912	102181507	STRBP	Novel_lncRNA	102181635	FHIT	0.953873	5.32e-06
TCONS_00057890	102168649	NBN	Novel_lncRNA	102171040	LOC102171040	0.953874	5.32e-06
TCONS_00010364	102178786	PPCS	Novel_lncRNA	108634776	LOC108634776	0.953903	5.31e-06
TCONS_00004691	102176274	ATP2C1	Novel_lncRNA	102178048	NOX1	0.953915	5.3e-06
TCONS_00107136	108635404	LOC108635404	Novel_lncRNA	102188148	PLCB1	0.953925	5.3e-06
TCONS_00049912	102181507	STRBP	Novel_lncRNA	XLOC_013256	XLOC_013256	0.953933	5.29e-06
TCONS_00048653	102180678	MAP4K3	Novel_lncRNA	102188466	WASL	0.953941	5.29e-06
TCONS_00100203	102185993	ATP7A	Novel_lncRNA	XLOC_029270	XLOC_029270	0.953941	5.29e-06
TCONS_00037564	102170234	LOC102170234	Novel_lncRNA	102187138	C10H15orf65	0.953942	5.29e-06
TCONS_00105665	XLOC_066994	XLOC_066994	Novel_lncRNA	102178786	PPCS	0.953945	5.29e-06
TCONS_00107456	XLOC_068302	XLOC_068302	Novel_lncRNA	108634770	LOC108634770	0.953954	5.28e-06
TCONS_00025728	102176770	PPP3CA	Novel_lncRNA	XLOC_029270	XLOC_029270	0.953955	5.28e-06
TCONS_00093961	102190578	GRK5	Novel_lncRNA	XLOC_019581	XLOC_019581	0.953957	5.28e-06
TCONS_00006790	XLOC_004475	XLOC_004475	Novel_lncRNA	102178786	PPCS	0.953969	5.28e-06
TCONS_00063391	102169401	AHCTF1	Novel_lncRNA	XLOC_026682	XLOC_026682	0.953974	5.27e-06
TCONS_00036044	108636534	LOC108636534	Novel_lncRNA	102183148	MCC	0.953986	5.27e-06
TCONS_00009736	XLOC_006211	XLOC_006211	Novel_lncRNA	108636534	LOC108636534	0.95399	5.27e-06
TCONS_00027506	100861211	BMPR1B	Novel_lncRNA	108634776	LOC108634776	0.953994	5.26e-06
TCONS_00107089	XLOC_068035	XLOC_068035	Novel_lncRNA	102186094	DEPDC4	0.953995	5.26e-06
TCONS_00051432	XLOC_032990	XLOC_032990	Novel_lncRNA	102189948	LOC102189948	0.954001	5.26e-06
TCONS_00104874	108634747	LOC108634747	Novel_lncRNA	102191543	NME7	0.954005	5.26e-06
TCONS_00025728	102176770	PPP3CA	Novel_lncRNA	XLOC_038940	XLOC_038940	0.95401	5.25e-06
TCONS_00104874	108634747	LOC108634747	Novel_lncRNA	108634770	LOC108634770	0.954012	5.25e-06
XR_001917274.1	102171119	LOC102171119	Annotated_lncRNA	102173013	FBXO11	0.954015	5.25e-06
TCONS_00105078	108634775	LOC108634775	Novel_lncRNA	XLOC_017040	XLOC_017040	0.954016	5.25e-06
TCONS_00051058	106502327	LOC106502327	Novel_lncRNA	102169869	IFT74	0.954018	5.25e-06
TCONS_00098561	XLOC_062381	XLOC_062381	Novel_lncRNA	108635081	LOC108635081	0.954039	5.24e-06
TCONS_00100202	102185993	ATP7A	Novel_lncRNA	XLOC_054487	XLOC_054487	0.954043	5.24e-06
TCONS_00083103	102178670	MAGI1	Novel_lncRNA	102175089	CUTC	0.954055	5.23e-06
TCONS_00104359	108634655	LOC108634655	Novel_lncRNA	102181635	FHIT	0.954058	5.23e-06
TCONS_00104357	108634655	LOC108634655	Novel_lncRNA	102178786	PPCS	0.954062	5.23e-06
TCONS_00104359	108634655	LOC108634655	Novel_lncRNA	102169869	IFT74	0.954064	5.23e-06
TCONS_00038362	102191138	PDSS2	Novel_lncRNA	102178786	PPCS	0.95407	5.22e-06
TCONS_00107456	XLOC_068302	XLOC_068302	Novel_lncRNA	102168890	ARID2	0.954078	5.22e-06
TCONS_00047284	102174942	PUM2	Novel_lncRNA	108635301	LOC108635301	0.95408	5.22e-06
TCONS_00028876	102181389	FBXL17	Novel_lncRNA	XLOC_060054	XLOC_060054	0.954082	5.22e-06
TCONS_00100202	102185993	ATP7A	Novel_lncRNA	102182011	LOC102182011	0.954087	5.22e-06
TCONS_00001068	102189992	P3H2	Novel_lncRNA	1485867	ND6	0.954098	5.21e-06
TCONS_00037564	102170234	LOC102170234	Novel_lncRNA	XLOC_001136	XLOC_001136	0.954099	5.21e-06
TCONS_00107136	108635404	LOC108635404	Novel_lncRNA	102190740	GTDC1	0.954105	5.21e-06
TCONS_00063391	102169401	AHCTF1	Novel_lncRNA	102182011	LOC102182011	0.95412	5.2e-06
TCONS_00107093	XLOC_068035	XLOC_068035	Novel_lncRNA	102186094	DEPDC4	0.954133	5.19e-06
TCONS_00107034	XLOC_067998	XLOC_067998	Novel_lncRNA	102181635	FHIT	0.954133	5.19e-06
TCONS_00062816	102169778	DCUN1D5	Novel_lncRNA	102188148	PLCB1	0.954137	5.19e-06
TCONS_00035964	102169005	SH3RF1	Novel_lncRNA	102186094	DEPDC4	0.954148	5.19e-06
TCONS_00062816	102169778	DCUN1D5	Novel_lncRNA	1485867	ND6	0.954157	5.18e-06
TCONS_00019805	102178594	ANKIB1	Novel_lncRNA	102180516	C15H11orf42	0.954168	5.17e-06
TCONS_00025728	102176770	PPP3CA	Novel_lncRNA	108638412	LOC108638412	0.954188	5.17e-06
TCONS_00063500	102187614	PLD5	Novel_lncRNA	102191645	C19H17orf64	0.954192	5.16e-06
TCONS_00107456	XLOC_068302	XLOC_068302	Novel_lncRNA	108635303	LOC108635303	0.954197	5.16e-06
TCONS_00107034	XLOC_067998	XLOC_067998	Novel_lncRNA	108634845	LOC108634845	0.954211	5.15e-06
TCONS_00019805	102178594	ANKIB1	Novel_lncRNA	102173098	LOC102173098	0.954212	5.15e-06
TCONS_00105053	108634775	LOC108634775	Novel_lncRNA	108638412	LOC108638412	0.954217	5.15e-06
TCONS_00071133	102173960	DNAJA2	Novel_lncRNA	102191614	GRIN3A	0.954233	5.14e-06
TCONS_00006446	102182546	C2H2orf76	Novel_lncRNA	102171040	LOC102171040	0.954233	5.14e-06
TCONS_00051058	106502327	LOC106502327	Novel_lncRNA	108634775	LOC108634775	0.954236	5.14e-06
TCONS_00083987	102172491	LANCL2	Novel_lncRNA	108635301	LOC108635301	0.954239	5.14e-06
TCONS_00016399	102189827	CNOT4	Novel_lncRNA	102189209	LOC102189209	0.954241	5.14e-06
TCONS_00046774	XLOC_030088	XLOC_030088	Novel_lncRNA	108634233	LOC108634233	0.954243	5.14e-06
TCONS_00104890	108634747	LOC108634747	Novel_lncRNA	102178786	PPCS	0.954243	5.14e-06
TCONS_00104357	108634655	LOC108634655	Novel_lncRNA	102186094	DEPDC4	0.954251	5.13e-06
TCONS_00063500	102187614	PLD5	Novel_lncRNA	XLOC_000557	XLOC_000557	0.954262	5.13e-06
TCONS_00000861	102188353	HSPBAP1	Novel_lncRNA	XLOC_060621	XLOC_060621	0.954267	5.13e-06
TCONS_00107085	XLOC_068035	XLOC_068035	Novel_lncRNA	102178786	PPCS	0.954282	5.12e-06
TCONS_00028890	102184717	EFNA5	Novel_lncRNA	102178786	PPCS	0.954282	5.12e-06
TCONS_00101113	102189748	TBL1X	Novel_lncRNA	102178786	PPCS	0.954282	5.12e-06
TCONS_00107086	XLOC_068035	XLOC_068035	Novel_lncRNA	102178786	PPCS	0.954282	5.12e-06
TCONS_00107135	108635404	LOC108635404	Novel_lncRNA	102178786	PPCS	0.954282	5.12e-06
TCONS_00107141	108635404	LOC108635404	Novel_lncRNA	102178786	PPCS	0.954282	5.12e-06
TCONS_00059256	102187511	CELF1	Novel_lncRNA	102178786	PPCS	0.954282	5.12e-06
TCONS_00062540	102174049	ZC3H12C	Novel_lncRNA	102178786	PPCS	0.954282	5.12e-06
TCONS_00062935	102183894	PRELP	Novel_lncRNA	102178786	PPCS	0.954282	5.12e-06
TCONS_00106358	XLOC_067486	XLOC_067486	Novel_lncRNA	102178786	PPCS	0.954282	5.12e-06
TCONS_00010589	102174897	LOC102174897	Novel_lncRNA	102178786	PPCS	0.954282	5.12e-06
TCONS_00078993	102174160	RNF180	Novel_lncRNA	102178786	PPCS	0.954282	5.12e-06
TCONS_00078182	102169909	ARL15	Novel_lncRNA	102178786	PPCS	0.954282	5.12e-06
TCONS_00079344	102171102	NIPBL	Novel_lncRNA	102178786	PPCS	0.954282	5.12e-06
TCONS_00075436	XLOC_048175	XLOC_048175	Novel_lncRNA	102178786	PPCS	0.954282	5.12e-06
TCONS_00034293	102186591	BNC2	Novel_lncRNA	102178786	PPCS	0.954282	5.12e-06
TCONS_00036852	102183872	SHB	Novel_lncRNA	102178786	PPCS	0.954282	5.12e-06
TCONS_00040550	102190605	CNKSR3	Novel_lncRNA	102178786	PPCS	0.954282	5.12e-06
TCONS_00021876	102168517	DUSP16	Novel_lncRNA	102178786	PPCS	0.954282	5.12e-06
TCONS_00026726	XLOC_017040	XLOC_017040	Novel_lncRNA	XLOC_019581	XLOC_019581	0.954291	5.11e-06
TCONS_00016399	102189827	CNOT4	Novel_lncRNA	108635301	LOC108635301	0.954291	5.11e-06
TCONS_00049912	102181507	STRBP	Novel_lncRNA	XLOC_009157	XLOC_009157	0.954307	5.11e-06
TCONS_00101125	108634335	SHROOM2	Novel_lncRNA	102181635	FHIT	0.954316	5.1e-06
TCONS_00100203	102185993	ATP7A	Novel_lncRNA	102179544	AHCYL2	0.954317	5.1e-06
TCONS_00062165	102189776	PLEKHA7	Novel_lncRNA	108634233	LOC108634233	0.954323	5.1e-06
TCONS_00104359	108634655	LOC108634655	Novel_lncRNA	108634233	LOC108634233	0.954332	5.09e-06
TCONS_00062816	102169778	DCUN1D5	Novel_lncRNA	102187134	ZCCHC7	0.954333	5.09e-06
TCONS_00063500	102187614	PLD5	Novel_lncRNA	102191622	CAMKMT	0.954349	5.09e-06
XR_001917334.1	106503653	LOC106503653	Annotated_lncRNA	102178786	PPCS	0.954352	5.08e-06
TCONS_00100202	102185993	ATP7A	Novel_lncRNA	XLOC_060054	XLOC_060054	0.954365	5.08e-06
TCONS_00107456	XLOC_068302	XLOC_068302	Novel_lncRNA	102179544	AHCYL2	0.954366	5.08e-06
TCONS_00062816	102169778	DCUN1D5	Novel_lncRNA	102169752	SRFBP1	0.954372	5.07e-06
TCONS_00063500	102187614	PLD5	Novel_lncRNA	108634032	LOC108634032	0.954374	5.07e-06
TCONS_00035962	102169005	SH3RF1	Novel_lncRNA	108636534	LOC108636534	0.954384	5.07e-06
TCONS_00063500	102187614	PLD5	Novel_lncRNA	XLOC_062680	XLOC_062680	0.954399	5.06e-06
TCONS_00100381	102179748	OPHN1	Novel_lncRNA	102175089	CUTC	0.9544	5.06e-06
TCONS_00105053	108634775	LOC108634775	Novel_lncRNA	XLOC_060621	XLOC_060621	0.954401	5.06e-06
TCONS_00051058	106502327	LOC106502327	Novel_lncRNA	102190095	SDK1	0.954428	5.05e-06
TCONS_00107456	XLOC_068302	XLOC_068302	Novel_lncRNA	102190888	MACROD2	0.95443	5.05e-06
TCONS_00100203	102185993	ATP7A	Novel_lncRNA	108634747	LOC108634747	0.954445	5.04e-06
TCONS_00046774	XLOC_030088	XLOC_030088	Novel_lncRNA	102189948	LOC102189948	0.954452	5.03e-06
TCONS_00100202	102185993	ATP7A	Novel_lncRNA	XLOC_026682	XLOC_026682	0.95446	5.03e-06
TCONS_00107085	XLOC_068035	XLOC_068035	Novel_lncRNA	102186094	DEPDC4	0.954461	5.03e-06
TCONS_00028890	102184717	EFNA5	Novel_lncRNA	102186094	DEPDC4	0.954461	5.03e-06
TCONS_00101113	102189748	TBL1X	Novel_lncRNA	102186094	DEPDC4	0.954461	5.03e-06
TCONS_00107086	XLOC_068035	XLOC_068035	Novel_lncRNA	102186094	DEPDC4	0.954461	5.03e-06
TCONS_00107135	108635404	LOC108635404	Novel_lncRNA	102186094	DEPDC4	0.954461	5.03e-06
TCONS_00107141	108635404	LOC108635404	Novel_lncRNA	102186094	DEPDC4	0.954461	5.03e-06
TCONS_00059256	102187511	CELF1	Novel_lncRNA	102186094	DEPDC4	0.954461	5.03e-06
TCONS_00062540	102174049	ZC3H12C	Novel_lncRNA	102186094	DEPDC4	0.954461	5.03e-06
TCONS_00062935	102183894	PRELP	Novel_lncRNA	102186094	DEPDC4	0.954461	5.03e-06
TCONS_00106358	XLOC_067486	XLOC_067486	Novel_lncRNA	102186094	DEPDC4	0.954461	5.03e-06
TCONS_00010589	102174897	LOC102174897	Novel_lncRNA	102186094	DEPDC4	0.954461	5.03e-06
TCONS_00078993	102174160	RNF180	Novel_lncRNA	102186094	DEPDC4	0.954461	5.03e-06
TCONS_00078182	102169909	ARL15	Novel_lncRNA	102186094	DEPDC4	0.954461	5.03e-06
TCONS_00079344	102171102	NIPBL	Novel_lncRNA	102186094	DEPDC4	0.954461	5.03e-06
TCONS_00075436	XLOC_048175	XLOC_048175	Novel_lncRNA	102186094	DEPDC4	0.954461	5.03e-06
TCONS_00034293	102186591	BNC2	Novel_lncRNA	102186094	DEPDC4	0.954461	5.03e-06
TCONS_00036852	102183872	SHB	Novel_lncRNA	102186094	DEPDC4	0.954461	5.03e-06
TCONS_00040550	102190605	CNKSR3	Novel_lncRNA	102186094	DEPDC4	0.954461	5.03e-06
TCONS_00021876	102168517	DUSP16	Novel_lncRNA	102186094	DEPDC4	0.954461	5.03e-06
TCONS_00016399	102189827	CNOT4	Novel_lncRNA	XLOC_063549	XLOC_063549	0.954464	5.03e-06
TCONS_00089728	102168225	MYO5B	Novel_lncRNA	108635301	LOC108635301	0.95448	5.02e-06
TCONS_00101125	108634335	SHROOM2	Novel_lncRNA	102181443	INO80D	0.954482	5.02e-06
TCONS_00100203	102185993	ATP7A	Novel_lncRNA	102185335	UMAD1	0.954502	5.01e-06
TCONS_00062165	102189776	PLEKHA7	Novel_lncRNA	102191614	GRIN3A	0.954511	5.01e-06
TCONS_00100203	102185993	ATP7A	Novel_lncRNA	102168641	SFTPB	0.954542	4.99e-06
TCONS_00027506	100861211	BMPR1B	Novel_lncRNA	108638412	LOC108638412	0.954542	4.99e-06
TCONS_00107074	XLOC_068033	XLOC_068033	Novel_lncRNA	102186604	CFAP77	0.954543	4.99e-06
TCONS_00078666	102182831	CCDC127	Novel_lncRNA	102175089	CUTC	0.954547	4.99e-06
TCONS_00062851	102168651	PDGFD	Novel_lncRNA	102187187	IMMP2L	0.954549	4.99e-06
TCONS_00031267	XLOC_019976	XLOC_019976	Novel_lncRNA	102189948	LOC102189948	0.954552	4.99e-06
TCONS_00107456	XLOC_068302	XLOC_068302	Novel_lncRNA	XLOC_029270	XLOC_029270	0.954576	4.97e-06
TCONS_00104374	108634655	LOC108634655	Novel_lncRNA	102169869	IFT74	0.954578	4.97e-06
TCONS_00105053	108634775	LOC108634775	Novel_lncRNA	102178302	CFAP52	0.95458	4.97e-06
TCONS_00062816	102169778	DCUN1D5	Novel_lncRNA	102172461	ZNF623	0.95458	4.97e-06
TCONS_00083103	102178670	MAGI1	Novel_lncRNA	108636938	TRNAC-GCA	0.954583	4.97e-06
TCONS_00107093	XLOC_068035	XLOC_068035	Novel_lncRNA	108635081	LOC108635081	0.954591	4.97e-06
TCONS_00104374	108634655	LOC108634655	Novel_lncRNA	102181635	FHIT	0.954592	4.97e-06
TCONS_00051058	106502327	LOC106502327	Novel_lncRNA	102174689	CA10	0.954592	4.97e-06
TCONS_00031267	XLOC_019976	XLOC_019976	Novel_lncRNA	XLOC_060621	XLOC_060621	0.954594	4.97e-06
TCONS_00063500	102187614	PLD5	Novel_lncRNA	102171194	TTC23	0.95461	4.96e-06
TCONS_00105053	108634775	LOC108634775	Novel_lncRNA	108634774	LOC108634774	0.954613	4.96e-06
TCONS_00010364	102178786	PPCS	Novel_lncRNA	102191614	GRIN3A	0.954615	4.96e-06
TCONS_00002588	XLOC_001767	XLOC_001767	Novel_lncRNA	XLOC_046524	XLOC_046524	0.954617	4.95e-06
TCONS_00083277	102182265	C22H3orf67	Novel_lncRNA	102168890	ARID2	0.954617	4.95e-06
XR_001917334.1	106503653	LOC106503653	Annotated_lncRNA	1485867	ND6	0.95462	4.95e-06
TCONS_00107074	XLOC_068033	XLOC_068033	Novel_lncRNA	102174997	SUN3	0.954627	4.95e-06
XR_001917334.1	106503653	LOC106503653	Annotated_lncRNA	108636938	TRNAC-GCA	0.95464	4.94e-06
TCONS_00046774	XLOC_030088	XLOC_030088	Novel_lncRNA	XLOC_060621	XLOC_060621	0.95465	4.94e-06
TCONS_00000861	102188353	HSPBAP1	Novel_lncRNA	102174997	SUN3	0.954655	4.94e-06
TCONS_00014574	XLOC_009163	XLOC_009163	Novel_lncRNA	102181635	FHIT	0.954656	4.94e-06
TCONS_00100202	102185993	ATP7A	Novel_lncRNA	102191614	GRIN3A	0.95467	4.93e-06
TCONS_00105602	108634845	LOC108634845	Novel_lncRNA	XLOC_004381	XLOC_004381	0.954673	4.93e-06
TCONS_00089728	102168225	MYO5B	Novel_lncRNA	102173909	LOC102173909	0.954678	4.92e-06
TCONS_00062816	102169778	DCUN1D5	Novel_lncRNA	108634233	LOC108634233	0.954684	4.92e-06
TCONS_00104359	108634655	LOC108634655	Novel_lncRNA	102172461	ZNF623	0.954685	4.92e-06
TCONS_00104890	108634747	LOC108634747	Novel_lncRNA	XLOC_060963	XLOC_060963	0.954688	4.92e-06
TCONS_00001068	102189992	P3H2	Novel_lncRNA	102186456	VWDE	0.954701	4.91e-06
TCONS_00025728	102176770	PPP3CA	Novel_lncRNA	XLOC_061297	XLOC_061297	0.954709	4.91e-06
TCONS_00049912	102181507	STRBP	Novel_lncRNA	102179748	OPHN1	0.954712	4.91e-06
TCONS_00068368	102177553	ANAPC10	Novel_lncRNA	108635301	LOC108635301	0.954715	4.91e-06
TCONS_00104357	108634655	LOC108634655	Novel_lncRNA	108635081	LOC108635081	0.954735	4.9e-06
TCONS_00006790	XLOC_004475	XLOC_004475	Novel_lncRNA	XLOC_026682	XLOC_026682	0.954744	4.89e-06
TCONS_00104374	108634655	LOC108634655	Novel_lncRNA	102188518	LOC102188518	0.954748	4.89e-06
TCONS_00101125	108634335	SHROOM2	Novel_lncRNA	XLOC_026682	XLOC_026682	0.954762	4.88e-06
TCONS_00051432	XLOC_032990	XLOC_032990	Novel_lncRNA	102168649	NBN	0.954768	4.88e-06
TCONS_00053185	102185098	PARD3	Novel_lncRNA	108638412	LOC108638412	0.954769	4.88e-06
TCONS_00106268	108635079	LOC108635079	Novel_lncRNA	102174997	SUN3	0.954792	4.87e-06
TCONS_00004633	102173974	DNAJC13	Novel_lncRNA	102173098	LOC102173098	0.954796	4.87e-06
TCONS_00105053	108634775	LOC108634775	Novel_lncRNA	102169752	SRFBP1	0.954809	4.86e-06
TCONS_00079345	102171102	NIPBL	Novel_lncRNA	102172461	ZNF623	0.95481	4.86e-06
TCONS_00031267	XLOC_019976	XLOC_019976	Novel_lncRNA	102191622	CAMKMT	0.954825	4.85e-06
TCONS_00045522	102183148	MCC	Novel_lncRNA	102173098	LOC102173098	0.954829	4.85e-06
TCONS_00025728	102176770	PPP3CA	Novel_lncRNA	XLOC_060963	XLOC_060963	0.954835	4.85e-06
TCONS_00107456	XLOC_068302	XLOC_068302	Novel_lncRNA	XLOC_029271	XLOC_029271	0.954839	4.85e-06
TCONS_00045035	102175214	NEO1	Novel_lncRNA	102186847	MKL1	0.954844	4.85e-06
TCONS_00105068	108634775	LOC108634775	Novel_lncRNA	108635301	LOC108635301	0.954853	4.84e-06
TCONS_00025728	102176770	PPP3CA	Novel_lncRNA	102171194	TTC23	0.954863	4.84e-06
TCONS_00107074	XLOC_068033	XLOC_068033	Novel_lncRNA	106502039	LOC106502039	0.95487	4.83e-06
TCONS_00098561	XLOC_062381	XLOC_062381	Novel_lncRNA	108634846	LOC108634846	0.954875	4.83e-06
TCONS_00010364	102178786	PPCS	Novel_lncRNA	102174689	CA10	0.954875	4.83e-06
TCONS_00063391	102169401	AHCTF1	Novel_lncRNA	102191614	GRIN3A	0.954895	4.82e-06
TCONS_00048653	102180678	MAP4K3	Novel_lncRNA	102171067	GDA	0.954902	4.82e-06
TCONS_00063391	102169401	AHCTF1	Novel_lncRNA	102170234	LOC102170234	0.954911	4.81e-06
TCONS_00107129	108635404	LOC108635404	Novel_lncRNA	102178786	PPCS	0.954919	4.81e-06
TCONS_00062816	102169778	DCUN1D5	Novel_lncRNA	102182011	LOC102182011	0.954921	4.81e-06
TCONS_00007312	102186529	FAM171B	Novel_lncRNA	102169752	SRFBP1	0.954927	4.81e-06
TCONS_00049912	102181507	STRBP	Novel_lncRNA	108636938	TRNAC-GCA	0.954935	4.8e-06
TCONS_00035964	102169005	SH3RF1	Novel_lncRNA	102189948	LOC102189948	0.954936	4.8e-06
TCONS_00098561	XLOC_062381	XLOC_062381	Novel_lncRNA	108635964	TRNAC-GCA	0.954939	4.8e-06
TCONS_00107456	XLOC_068302	XLOC_068302	Novel_lncRNA	102179748	OPHN1	0.954944	4.8e-06
TCONS_00107085	XLOC_068035	XLOC_068035	Novel_lncRNA	108635081	LOC108635081	0.954979	4.78e-06
TCONS_00028890	102184717	EFNA5	Novel_lncRNA	108635081	LOC108635081	0.954979	4.78e-06
TCONS_00101113	102189748	TBL1X	Novel_lncRNA	108635081	LOC108635081	0.954979	4.78e-06
TCONS_00107086	XLOC_068035	XLOC_068035	Novel_lncRNA	108635081	LOC108635081	0.954979	4.78e-06
TCONS_00107135	108635404	LOC108635404	Novel_lncRNA	108635081	LOC108635081	0.954979	4.78e-06
TCONS_00107141	108635404	LOC108635404	Novel_lncRNA	108635081	LOC108635081	0.954979	4.78e-06
TCONS_00059256	102187511	CELF1	Novel_lncRNA	108635081	LOC108635081	0.954979	4.78e-06
TCONS_00062540	102174049	ZC3H12C	Novel_lncRNA	108635081	LOC108635081	0.954979	4.78e-06
TCONS_00062935	102183894	PRELP	Novel_lncRNA	108635081	LOC108635081	0.954979	4.78e-06
TCONS_00106358	XLOC_067486	XLOC_067486	Novel_lncRNA	108635081	LOC108635081	0.954979	4.78e-06
TCONS_00010589	102174897	LOC102174897	Novel_lncRNA	108635081	LOC108635081	0.954979	4.78e-06
TCONS_00078993	102174160	RNF180	Novel_lncRNA	108635081	LOC108635081	0.954979	4.78e-06
TCONS_00078182	102169909	ARL15	Novel_lncRNA	108635081	LOC108635081	0.954979	4.78e-06
TCONS_00079344	102171102	NIPBL	Novel_lncRNA	108635081	LOC108635081	0.954979	4.78e-06
TCONS_00075436	XLOC_048175	XLOC_048175	Novel_lncRNA	108635081	LOC108635081	0.954979	4.78e-06
TCONS_00034293	102186591	BNC2	Novel_lncRNA	108635081	LOC108635081	0.954979	4.78e-06
TCONS_00036852	102183872	SHB	Novel_lncRNA	108635081	LOC108635081	0.954979	4.78e-06
TCONS_00040550	102190605	CNKSR3	Novel_lncRNA	108635081	LOC108635081	0.954979	4.78e-06
TCONS_00021876	102168517	DUSP16	Novel_lncRNA	108635081	LOC108635081	0.954979	4.78e-06
TCONS_00105665	XLOC_066994	XLOC_066994	Novel_lncRNA	102170234	LOC102170234	0.954981	4.78e-06
TCONS_00106268	108635079	LOC108635079	Novel_lncRNA	106502527	LOC106502527	0.955008	4.77e-06
TCONS_00104874	108634747	LOC108634747	Novel_lncRNA	102168484	EVA1C	0.955012	4.77e-06
TCONS_00045522	102183148	MCC	Novel_lncRNA	108636534	LOC108636534	0.955026	4.76e-06
TCONS_00062816	102169778	DCUN1D5	Novel_lncRNA	XLOC_025775	XLOC_025775	0.955028	4.76e-06
TCONS_00004634	102173974	DNAJC13	Novel_lncRNA	108634846	LOC108634846	0.955042	4.75e-06
TCONS_00063500	102187614	PLD5	Novel_lncRNA	108634333	LOC108634333	0.95505	4.75e-06
TCONS_00105078	108634775	LOC108634775	Novel_lncRNA	102174997	SUN3	0.95505	4.75e-06
TCONS_00107129	108635404	LOC108635404	Novel_lncRNA	XLOC_060963	XLOC_060963	0.955052	4.75e-06
TCONS_00063500	102187614	PLD5	Novel_lncRNA	102182635	CATSPERB	0.955053	4.75e-06
TCONS_00051432	XLOC_032990	XLOC_032990	Novel_lncRNA	102186094	DEPDC4	0.955054	4.75e-06
TCONS_00062816	102169778	DCUN1D5	Novel_lncRNA	102186177	RNLS	0.955056	4.75e-06
TCONS_00007312	102186529	FAM171B	Novel_lncRNA	102181635	FHIT	0.955085	4.73e-06
TCONS_00107074	XLOC_068033	XLOC_068033	Novel_lncRNA	102179335	ITIH1	0.95509	4.73e-06
TCONS_00105053	108634775	LOC108634775	Novel_lncRNA	102175089	CUTC	0.955092	4.73e-06
TCONS_00031267	XLOC_019976	XLOC_019976	Novel_lncRNA	102180516	C15H11orf42	0.955096	4.73e-06
TCONS_00047284	102174942	PUM2	Novel_lncRNA	XLOC_038936	XLOC_038936	0.955097	4.73e-06
TCONS_00027506	100861211	BMPR1B	Novel_lncRNA	XLOC_022645	XLOC_022645	0.955098	4.73e-06
TCONS_00107093	XLOC_068035	XLOC_068035	Novel_lncRNA	102182011	LOC102182011	0.955101	4.72e-06
TCONS_00105078	108634775	LOC108634775	Novel_lncRNA	102168649	NBN	0.955105	4.72e-06
TCONS_00079345	102171102	NIPBL	Novel_lncRNA	108634770	LOC108634770	0.955149	4.7e-06
TCONS_00006790	XLOC_004475	XLOC_004475	Novel_lncRNA	102170234	LOC102170234	0.95516	4.7e-06
TCONS_00031267	XLOC_019976	XLOC_019976	Novel_lncRNA	102171067	GDA	0.955165	4.69e-06
TCONS_00107136	108635404	LOC108635404	Novel_lncRNA	102175089	CUTC	0.955167	4.69e-06
TCONS_00062816	102169778	DCUN1D5	Novel_lncRNA	102168514	LOC102168514	0.955175	4.69e-06
TCONS_00063391	102169401	AHCTF1	Novel_lncRNA	102186094	DEPDC4	0.955186	4.68e-06
TCONS_00025728	102176770	PPP3CA	Novel_lncRNA	102181263	HDAC9	0.955188	4.68e-06
TCONS_00062165	102189776	PLEKHA7	Novel_lncRNA	102168649	NBN	0.95519	4.68e-06
TCONS_00004634	102173974	DNAJC13	Novel_lncRNA	XLOC_028036	XLOC_028036	0.955206	4.68e-06
TCONS_00028876	102181389	FBXL17	Novel_lncRNA	102189074	ISL2	0.955209	4.67e-06
TCONS_00107093	XLOC_068035	XLOC_068035	Novel_lncRNA	XLOC_026682	XLOC_026682	0.955211	4.67e-06
TCONS_00104374	108634655	LOC108634655	Novel_lncRNA	102189948	LOC102189948	0.955211	4.67e-06
TCONS_00100203	102185993	ATP7A	Novel_lncRNA	102170234	LOC102170234	0.955217	4.67e-06
TCONS_00107074	XLOC_068033	XLOC_068033	Novel_lncRNA	XLOC_043219	XLOC_043219	0.955227	4.67e-06
XR_001917334.1	106503653	LOC106503653	Annotated_lncRNA	108634770	LOC108634770	0.95525	4.66e-06
TCONS_00105665	XLOC_066994	XLOC_066994	Novel_lncRNA	102182011	LOC102182011	0.955269	4.65e-06
TCONS_00107089	XLOC_068035	XLOC_068035	Novel_lncRNA	102169869	IFT74	0.955271	4.65e-06
TCONS_00063500	102187614	PLD5	Novel_lncRNA	108637086	LOC108637086	0.955274	4.64e-06
TCONS_00056769	102190335	SPAG1	Novel_lncRNA	102173098	LOC102173098	0.955278	4.64e-06
TCONS_00016399	102189827	CNOT4	Novel_lncRNA	102168514	LOC102168514	0.955299	4.63e-06
TCONS_00105665	XLOC_066994	XLOC_066994	Novel_lncRNA	1485867	ND6	0.955305	4.63e-06
TCONS_00107034	XLOC_067998	XLOC_067998	Novel_lncRNA	102181263	HDAC9	0.95533	4.62e-06
TCONS_00063500	102187614	PLD5	Novel_lncRNA	102174621	LOC102174621	0.95534	4.61e-06
TCONS_00025728	102176770	PPP3CA	Novel_lncRNA	102168649	NBN	0.955343	4.61e-06
TCONS_00106262	108635080	LOC108635080	Novel_lncRNA	100861187	PAEP	0.955346	4.61e-06
TCONS_00104874	108634747	LOC108634747	Novel_lncRNA	106502021	MAGI2	0.955349	4.61e-06
TCONS_00093961	102190578	GRK5	Novel_lncRNA	1485866	ND5	0.955354	4.61e-06
TCONS_00083277	102182265	C22H3orf67	Novel_lncRNA	108636938	TRNAC-GCA	0.955362	4.6e-06
TCONS_00107089	XLOC_068035	XLOC_068035	Novel_lncRNA	XLOC_026682	XLOC_026682	0.955371	4.6e-06
TCONS_00098561	XLOC_062381	XLOC_062381	Novel_lncRNA	102168641	SFTPB	0.955371	4.6e-06
TCONS_00002588	XLOC_001767	XLOC_001767	Novel_lncRNA	102170234	LOC102170234	0.955387	4.59e-06
TCONS_00019805	102178594	ANKIB1	Novel_lncRNA	108636534	LOC108636534	0.955392	4.59e-06
TCONS_00063500	102187614	PLD5	Novel_lncRNA	102187187	IMMP2L	0.955397	4.59e-06
TCONS_00045035	102175214	NEO1	Novel_lncRNA	102181263	HDAC9	0.955401	4.59e-06
TCONS_00062851	102168651	PDGFD	Novel_lncRNA	102189074	ISL2	0.955405	4.58e-06
TCONS_00107093	XLOC_068035	XLOC_068035	Novel_lncRNA	102189948	LOC102189948	0.955415	4.58e-06
TCONS_00000861	102188353	HSPBAP1	Novel_lncRNA	102175089	CUTC	0.955444	4.57e-06
TCONS_00107093	XLOC_068035	XLOC_068035	Novel_lncRNA	XLOC_060054	XLOC_060054	0.955474	4.55e-06
TCONS_00021890	102177417	LRP6	Novel_lncRNA	108638412	LOC108638412	0.955476	4.55e-06
TCONS_00101125	108634335	SHROOM2	Novel_lncRNA	102186094	DEPDC4	0.955478	4.55e-06
TCONS_00000861	102188353	HSPBAP1	Novel_lncRNA	XLOC_019581	XLOC_019581	0.955482	4.55e-06
TCONS_00004634	102173974	DNAJC13	Novel_lncRNA	102171067	GDA	0.955483	4.55e-06
TCONS_00046774	XLOC_030088	XLOC_030088	Novel_lncRNA	XLOC_017040	XLOC_017040	0.955499	4.54e-06
XR_001917334.1	106503653	LOC106503653	Annotated_lncRNA	108634233	LOC108634233	0.955507	4.54e-06
TCONS_00025728	102176770	PPP3CA	Novel_lncRNA	XLOC_011953	XLOC_011953	0.955514	4.53e-06
TCONS_00104359	108634655	LOC108634655	Novel_lncRNA	102175089	CUTC	0.955516	4.53e-06
TCONS_00107089	XLOC_068035	XLOC_068035	Novel_lncRNA	102178786	PPCS	0.955517	4.53e-06
TCONS_00016399	102189827	CNOT4	Novel_lncRNA	102187134	ZCCHC7	0.955534	4.53e-06
TCONS_00107136	108635404	LOC108635404	Novel_lncRNA	102169869	IFT74	0.95554	4.52e-06
TCONS_00079345	102171102	NIPBL	Novel_lncRNA	108634233	LOC108634233	0.955541	4.52e-06
TCONS_00098561	XLOC_062381	XLOC_062381	Novel_lncRNA	102186604	CFAP77	0.955543	4.52e-06
TCONS_00047284	102174942	PUM2	Novel_lncRNA	102191622	CAMKMT	0.955543	4.52e-06
TCONS_00035964	102169005	SH3RF1	Novel_lncRNA	108635081	LOC108635081	0.955554	4.52e-06
TCONS_00036044	108636534	LOC108636534	Novel_lncRNA	108635242	LOC108635242	0.955556	4.52e-06
TCONS_00010364	102178786	PPCS	Novel_lncRNA	102181635	FHIT	0.955573	4.51e-06
TCONS_00051058	106502327	LOC106502327	Novel_lncRNA	102178786	PPCS	0.955584	4.5e-06
TCONS_00049912	102181507	STRBP	Novel_lncRNA	106502810	LOC106502810	0.955598	4.5e-06
TCONS_00097124	102188740	VCL	Novel_lncRNA	102172665	CWC27	0.955602	4.49e-06
TCONS_00002588	XLOC_001767	XLOC_001767	Novel_lncRNA	XLOC_022645	XLOC_022645	0.955609	4.49e-06
TCONS_00106268	108635079	LOC108635079	Novel_lncRNA	102181443	INO80D	0.95562	4.49e-06
TCONS_00104374	108634655	LOC108634655	Novel_lncRNA	102175089	CUTC	0.955622	4.49e-06
XR_001917334.1	106503653	LOC106503653	Annotated_lncRNA	102188518	LOC102188518	0.955635	4.48e-06
TCONS_00083277	102182265	C22H3orf67	Novel_lncRNA	XLOC_026682	XLOC_026682	0.955649	4.47e-06
TCONS_00107456	XLOC_068302	XLOC_068302	Novel_lncRNA	106502417	LOC106502417	0.95565	4.47e-06
TCONS_00063500	102187614	PLD5	Novel_lncRNA	102181821	LOC102181821	0.955652	4.47e-06
TCONS_00063500	102187614	PLD5	Novel_lncRNA	108634769	LOC108634769	0.955657	4.47e-06
TCONS_00105078	108634775	LOC108634775	Novel_lncRNA	106502527	LOC106502527	0.955665	4.47e-06
TCONS_00045522	102183148	MCC	Novel_lncRNA	102180516	C15H11orf42	0.955666	4.47e-06
TCONS_00104376	108634655	LOC108634655	Novel_lncRNA	100861187	PAEP	0.955675	4.46e-06
TCONS_00105060	108634775	LOC108634775	Novel_lncRNA	100861187	PAEP	0.955675	4.46e-06
TCONS_00106249	108635079	LOC108635079	Novel_lncRNA	100861187	PAEP	0.955675	4.46e-06
TCONS_00106252	108635079	LOC108635079	Novel_lncRNA	100861187	PAEP	0.955675	4.46e-06
TCONS_00041930	XLOC_026923	XLOC_026923	Novel_lncRNA	100861187	PAEP	0.955675	4.46e-06
TCONS_00041931	XLOC_026923	XLOC_026923	Novel_lncRNA	100861187	PAEP	0.955675	4.46e-06
TCONS_00044403	XLOC_028512	XLOC_028512	Novel_lncRNA	100861187	PAEP	0.955675	4.46e-06
TCONS_00044407	XLOC_028512	XLOC_028512	Novel_lncRNA	100861187	PAEP	0.955675	4.46e-06
TCONS_00053221	102188059	PLXDC2	Novel_lncRNA	100861187	PAEP	0.955675	4.46e-06
TCONS_00104359	108634655	LOC108634655	Novel_lncRNA	108634775	LOC108634775	0.955682	4.46e-06
TCONS_00062816	102169778	DCUN1D5	Novel_lncRNA	102169869	IFT74	0.955706	4.45e-06
TCONS_00107136	108635404	LOC108635404	Novel_lncRNA	108634774	LOC108634774	0.955718	4.44e-06
TCONS_00002588	XLOC_001767	XLOC_001767	Novel_lncRNA	102174689	CA10	0.955728	4.44e-06
TCONS_00083277	102182265	C22H3orf67	Novel_lncRNA	102182306	RFX3	0.95573	4.44e-06
TCONS_00083987	102172491	LANCL2	Novel_lncRNA	1485866	ND5	0.955754	4.43e-06
TCONS_00100203	102185993	ATP7A	Novel_lncRNA	108636938	TRNAC-GCA	0.955756	4.43e-06
TCONS_00105665	XLOC_066994	XLOC_066994	Novel_lncRNA	108636938	TRNAC-GCA	0.955761	4.42e-06
TCONS_00107456	XLOC_068302	XLOC_068302	Novel_lncRNA	102177553	ANAPC10	0.955778	4.42e-06
TCONS_00032928	XLOC_020938	XLOC_020938	Novel_lncRNA	100861187	PAEP	0.955784	4.41e-06
TCONS_00031267	XLOC_019976	XLOC_019976	Novel_lncRNA	102190528	TDRD3	0.955788	4.41e-06
TCONS_00083103	102178670	MAGI1	Novel_lncRNA	102178786	PPCS	0.955795	4.41e-06
TCONS_00107093	XLOC_068035	XLOC_068035	Novel_lncRNA	102175089	CUTC	0.955803	4.41e-06
TCONS_00028890	102184717	EFNA5	Novel_lncRNA	102169869	IFT74	0.955817	4.4e-06
TCONS_00101113	102189748	TBL1X	Novel_lncRNA	102169869	IFT74	0.955817	4.4e-06
TCONS_00107086	XLOC_068035	XLOC_068035	Novel_lncRNA	102169869	IFT74	0.955817	4.4e-06
TCONS_00107135	108635404	LOC108635404	Novel_lncRNA	102169869	IFT74	0.955817	4.4e-06
TCONS_00107141	108635404	LOC108635404	Novel_lncRNA	102169869	IFT74	0.955817	4.4e-06
TCONS_00059256	102187511	CELF1	Novel_lncRNA	102169869	IFT74	0.955817	4.4e-06
TCONS_00062540	102174049	ZC3H12C	Novel_lncRNA	102169869	IFT74	0.955817	4.4e-06
TCONS_00062935	102183894	PRELP	Novel_lncRNA	102169869	IFT74	0.955817	4.4e-06
TCONS_00106358	XLOC_067486	XLOC_067486	Novel_lncRNA	102169869	IFT74	0.955817	4.4e-06
TCONS_00010589	102174897	LOC102174897	Novel_lncRNA	102169869	IFT74	0.955817	4.4e-06
TCONS_00078993	102174160	RNF180	Novel_lncRNA	102169869	IFT74	0.955817	4.4e-06
TCONS_00078182	102169909	ARL15	Novel_lncRNA	102169869	IFT74	0.955817	4.4e-06
TCONS_00079344	102171102	NIPBL	Novel_lncRNA	102169869	IFT74	0.955817	4.4e-06
TCONS_00075436	XLOC_048175	XLOC_048175	Novel_lncRNA	102169869	IFT74	0.955817	4.4e-06
TCONS_00034293	102186591	BNC2	Novel_lncRNA	102169869	IFT74	0.955817	4.4e-06
TCONS_00036852	102183872	SHB	Novel_lncRNA	102169869	IFT74	0.955817	4.4e-06
TCONS_00040550	102190605	CNKSR3	Novel_lncRNA	102169869	IFT74	0.955817	4.4e-06
TCONS_00021876	102168517	DUSP16	Novel_lncRNA	102169869	IFT74	0.955817	4.4e-06
TCONS_00107085	XLOC_068035	XLOC_068035	Novel_lncRNA	102169869	IFT74	0.955817	4.4e-06
TCONS_00063391	102169401	AHCTF1	Novel_lncRNA	XLOC_054487	XLOC_054487	0.955817	4.4e-06
TCONS_00062816	102169778	DCUN1D5	Novel_lncRNA	106502527	LOC106502527	0.955821	4.4e-06
TCONS_00101125	108634335	SHROOM2	Novel_lncRNA	102168890	ARID2	0.955827	4.39e-06
XR_001917334.1	106503653	LOC106503653	Annotated_lncRNA	102191622	CAMKMT	0.955834	4.39e-06
TCONS_00107136	108635404	LOC108635404	Novel_lncRNA	102181263	HDAC9	0.955846	4.39e-06
TCONS_00107093	XLOC_068035	XLOC_068035	Novel_lncRNA	102169869	IFT74	0.95585	4.38e-06
TCONS_00104357	108634655	LOC108634655	Novel_lncRNA	XLOC_026682	XLOC_026682	0.955859	4.38e-06
TCONS_00007312	102186529	FAM171B	Novel_lncRNA	102171067	GDA	0.95586	4.38e-06
TCONS_00049912	102181507	STRBP	Novel_lncRNA	108637766	LOC108637766	0.955872	4.37e-06
TCONS_00062851	102168651	PDGFD	Novel_lncRNA	102182011	LOC102182011	0.955876	4.37e-06
TCONS_00104357	108634655	LOC108634655	Novel_lncRNA	102169869	IFT74	0.955889	4.37e-06
TCONS_00062165	102189776	PLEKHA7	Novel_lncRNA	XLOC_046524	XLOC_046524	0.955921	4.35e-06
TCONS_00100203	102185993	ATP7A	Novel_lncRNA	1485866	ND5	0.955926	4.35e-06
TCONS_00105068	108634775	LOC108634775	Novel_lncRNA	102187187	IMMP2L	0.955931	4.35e-06
TCONS_00049912	102181507	STRBP	Novel_lncRNA	102191138	PDSS2	0.955931	4.35e-06
TCONS_00105665	XLOC_066994	XLOC_066994	Novel_lncRNA	102189948	LOC102189948	0.955932	4.35e-06
TCONS_00101125	108634335	SHROOM2	Novel_lncRNA	1485867	ND6	0.955936	4.35e-06
TCONS_00104357	108634655	LOC108634655	Novel_lncRNA	102189948	LOC102189948	0.955951	4.34e-06
TCONS_00025728	102176770	PPP3CA	Novel_lncRNA	102190888	MACROD2	0.955961	4.34e-06
TCONS_00104890	108634747	LOC108634747	Novel_lncRNA	102169869	IFT74	0.955965	4.33e-06
TCONS_00107456	XLOC_068302	XLOC_068302	Novel_lncRNA	XLOC_013787	XLOC_013787	0.955968	4.33e-06
TCONS_00000861	102188353	HSPBAP1	Novel_lncRNA	108636534	LOC108636534	0.955992	4.32e-06
TCONS_00004634	102173974	DNAJC13	Novel_lncRNA	100861211	BMPR1B	0.955992	4.32e-06
TCONS_00107085	XLOC_068035	XLOC_068035	Novel_lncRNA	XLOC_026682	XLOC_026682	0.956012	4.31e-06
TCONS_00028890	102184717	EFNA5	Novel_lncRNA	XLOC_026682	XLOC_026682	0.956012	4.31e-06
TCONS_00101113	102189748	TBL1X	Novel_lncRNA	XLOC_026682	XLOC_026682	0.956012	4.31e-06
TCONS_00107086	XLOC_068035	XLOC_068035	Novel_lncRNA	XLOC_026682	XLOC_026682	0.956012	4.31e-06
TCONS_00107135	108635404	LOC108635404	Novel_lncRNA	XLOC_026682	XLOC_026682	0.956012	4.31e-06
TCONS_00107141	108635404	LOC108635404	Novel_lncRNA	XLOC_026682	XLOC_026682	0.956012	4.31e-06
TCONS_00059256	102187511	CELF1	Novel_lncRNA	XLOC_026682	XLOC_026682	0.956012	4.31e-06
TCONS_00062540	102174049	ZC3H12C	Novel_lncRNA	XLOC_026682	XLOC_026682	0.956012	4.31e-06
TCONS_00062935	102183894	PRELP	Novel_lncRNA	XLOC_026682	XLOC_026682	0.956012	4.31e-06
TCONS_00106358	XLOC_067486	XLOC_067486	Novel_lncRNA	XLOC_026682	XLOC_026682	0.956012	4.31e-06
TCONS_00010589	102174897	LOC102174897	Novel_lncRNA	XLOC_026682	XLOC_026682	0.956012	4.31e-06
TCONS_00078993	102174160	RNF180	Novel_lncRNA	XLOC_026682	XLOC_026682	0.956012	4.31e-06
TCONS_00078182	102169909	ARL15	Novel_lncRNA	XLOC_026682	XLOC_026682	0.956012	4.31e-06
TCONS_00079344	102171102	NIPBL	Novel_lncRNA	XLOC_026682	XLOC_026682	0.956012	4.31e-06
TCONS_00075436	XLOC_048175	XLOC_048175	Novel_lncRNA	XLOC_026682	XLOC_026682	0.956012	4.31e-06
TCONS_00034293	102186591	BNC2	Novel_lncRNA	XLOC_026682	XLOC_026682	0.956012	4.31e-06
TCONS_00036852	102183872	SHB	Novel_lncRNA	XLOC_026682	XLOC_026682	0.956012	4.31e-06
TCONS_00040550	102190605	CNKSR3	Novel_lncRNA	XLOC_026682	XLOC_026682	0.956012	4.31e-06
TCONS_00021876	102168517	DUSP16	Novel_lncRNA	XLOC_026682	XLOC_026682	0.956012	4.31e-06
TCONS_00063500	102187614	PLD5	Novel_lncRNA	102172314	LOC102172314	0.956039	4.3e-06
TCONS_00105665	XLOC_066994	XLOC_066994	Novel_lncRNA	108635081	LOC108635081	0.956044	4.3e-06
TCONS_00105602	108634845	LOC108634845	Novel_lncRNA	102189948	LOC102189948	0.956047	4.3e-06
TCONS_00083103	102178670	MAGI1	Novel_lncRNA	102169752	SRFBP1	0.956047	4.3e-06
TCONS_00107034	XLOC_067998	XLOC_067998	Novel_lncRNA	102173909	LOC102173909	0.956077	4.29e-06
TCONS_00045522	102183148	MCC	Novel_lncRNA	XLOC_004381	XLOC_004381	0.956085	4.28e-06
TCONS_00007312	102186529	FAM171B	Novel_lncRNA	102181263	HDAC9	0.956104	4.27e-06
TCONS_00037564	102170234	LOC102170234	Novel_lncRNA	102190888	MACROD2	0.956105	4.27e-06
TCONS_00047284	102174942	PUM2	Novel_lncRNA	102173909	LOC102173909	0.956105	4.27e-06
TCONS_00006790	XLOC_004475	XLOC_004475	Novel_lncRNA	XLOC_060054	XLOC_060054	0.956113	4.27e-06
TCONS_00004633	102173974	DNAJC13	Novel_lncRNA	XLOC_004381	XLOC_004381	0.956118	4.27e-06
TCONS_00104357	108634655	LOC108634655	Novel_lncRNA	102182011	LOC102182011	0.956126	4.26e-06
TCONS_00105602	108634845	LOC108634845	Novel_lncRNA	102191716	ERICH5	0.956154	4.25e-06
TCONS_00063500	102187614	PLD5	Novel_lncRNA	102185346	ARL13A	0.956185	4.24e-06
TCONS_00062851	102168651	PDGFD	Novel_lncRNA	XLOC_017040	XLOC_017040	0.956186	4.24e-06
TCONS_00107085	XLOC_068035	XLOC_068035	Novel_lncRNA	102189948	LOC102189948	0.9562	4.23e-06
TCONS_00028890	102184717	EFNA5	Novel_lncRNA	102189948	LOC102189948	0.956201	4.23e-06
TCONS_00101113	102189748	TBL1X	Novel_lncRNA	102189948	LOC102189948	0.956201	4.23e-06
TCONS_00107086	XLOC_068035	XLOC_068035	Novel_lncRNA	102189948	LOC102189948	0.956201	4.23e-06
TCONS_00107135	108635404	LOC108635404	Novel_lncRNA	102189948	LOC102189948	0.956201	4.23e-06
TCONS_00107141	108635404	LOC108635404	Novel_lncRNA	102189948	LOC102189948	0.956201	4.23e-06
TCONS_00059256	102187511	CELF1	Novel_lncRNA	102189948	LOC102189948	0.956201	4.23e-06
TCONS_00062540	102174049	ZC3H12C	Novel_lncRNA	102189948	LOC102189948	0.956201	4.23e-06
TCONS_00062935	102183894	PRELP	Novel_lncRNA	102189948	LOC102189948	0.956201	4.23e-06
TCONS_00106358	XLOC_067486	XLOC_067486	Novel_lncRNA	102189948	LOC102189948	0.956201	4.23e-06
TCONS_00010589	102174897	LOC102174897	Novel_lncRNA	102189948	LOC102189948	0.956201	4.23e-06
TCONS_00078993	102174160	RNF180	Novel_lncRNA	102189948	LOC102189948	0.956201	4.23e-06
TCONS_00078182	102169909	ARL15	Novel_lncRNA	102189948	LOC102189948	0.956201	4.23e-06
TCONS_00079344	102171102	NIPBL	Novel_lncRNA	102189948	LOC102189948	0.956201	4.23e-06
TCONS_00075436	XLOC_048175	XLOC_048175	Novel_lncRNA	102189948	LOC102189948	0.956201	4.23e-06
TCONS_00034293	102186591	BNC2	Novel_lncRNA	102189948	LOC102189948	0.956201	4.23e-06
TCONS_00036852	102183872	SHB	Novel_lncRNA	102189948	LOC102189948	0.956201	4.23e-06
TCONS_00040550	102190605	CNKSR3	Novel_lncRNA	102189948	LOC102189948	0.956201	4.23e-06
TCONS_00021876	102168517	DUSP16	Novel_lncRNA	102189948	LOC102189948	0.956201	4.23e-06
TCONS_00036044	108636534	LOC108636534	Novel_lncRNA	XLOC_028036	XLOC_028036	0.956203	4.23e-06
TCONS_00026726	XLOC_017040	XLOC_017040	Novel_lncRNA	XLOC_004381	XLOC_004381	0.956222	4.22e-06
TCONS_00045522	102183148	MCC	Novel_lncRNA	108635301	LOC108635301	0.956236	4.22e-06
TCONS_00063500	102187614	PLD5	Novel_lncRNA	XLOC_046442	XLOC_046442	0.956237	4.22e-06
TCONS_00062851	102168651	PDGFD	Novel_lncRNA	102191622	CAMKMT	0.956253	4.21e-06
TCONS_00051432	XLOC_032990	XLOC_032990	Novel_lncRNA	102182011	LOC102182011	0.956261	4.21e-06
TCONS_00071133	102173960	DNAJA2	Novel_lncRNA	102181635	FHIT	0.956272	4.2e-06
TCONS_00049912	102181507	STRBP	Novel_lncRNA	102190888	MACROD2	0.956272	4.2e-06
TCONS_00100381	102179748	OPHN1	Novel_lncRNA	102180516	C15H11orf42	0.956273	4.2e-06
TCONS_00056769	102190335	SPAG1	Novel_lncRNA	XLOC_060621	XLOC_060621	0.956289	4.19e-06
TCONS_00107089	XLOC_068035	XLOC_068035	Novel_lncRNA	102182011	LOC102182011	0.956294	4.19e-06
TCONS_00049912	102181507	STRBP	Novel_lncRNA	102179335	ITIH1	0.956299	4.19e-06
TCONS_00104357	108634655	LOC108634655	Novel_lncRNA	XLOC_060054	XLOC_060054	0.956314	4.18e-06
TCONS_00106268	108635079	LOC108635079	Novel_lncRNA	102190431	SGK2	0.956319	4.18e-06
TCONS_00083103	102178670	MAGI1	Novel_lncRNA	102178302	CFAP52	0.956348	4.17e-06
TCONS_00063391	102169401	AHCTF1	Novel_lncRNA	102178786	PPCS	0.956355	4.17e-06
TCONS_00100203	102185993	ATP7A	Novel_lncRNA	108634087	LOC108634087	0.956356	4.17e-06
TCONS_00004634	102173974	DNAJC13	Novel_lncRNA	108635155	LOC108635155	0.95636	4.16e-06
TCONS_00100203	102185993	ATP7A	Novel_lncRNA	102186177	RNLS	0.956361	4.16e-06
TCONS_00107085	XLOC_068035	XLOC_068035	Novel_lncRNA	XLOC_060054	XLOC_060054	0.956368	4.16e-06
TCONS_00107086	XLOC_068035	XLOC_068035	Novel_lncRNA	XLOC_060054	XLOC_060054	0.956368	4.16e-06
TCONS_00107135	108635404	LOC108635404	Novel_lncRNA	XLOC_060054	XLOC_060054	0.956368	4.16e-06
TCONS_00062540	102174049	ZC3H12C	Novel_lncRNA	XLOC_060054	XLOC_060054	0.956368	4.16e-06
TCONS_00078182	102169909	ARL15	Novel_lncRNA	XLOC_060054	XLOC_060054	0.956368	4.16e-06
TCONS_00028890	102184717	EFNA5	Novel_lncRNA	XLOC_060054	XLOC_060054	0.956368	4.16e-06
TCONS_00101113	102189748	TBL1X	Novel_lncRNA	XLOC_060054	XLOC_060054	0.956368	4.16e-06
TCONS_00107141	108635404	LOC108635404	Novel_lncRNA	XLOC_060054	XLOC_060054	0.956368	4.16e-06
TCONS_00059256	102187511	CELF1	Novel_lncRNA	XLOC_060054	XLOC_060054	0.956368	4.16e-06
TCONS_00062935	102183894	PRELP	Novel_lncRNA	XLOC_060054	XLOC_060054	0.956368	4.16e-06
TCONS_00106358	XLOC_067486	XLOC_067486	Novel_lncRNA	XLOC_060054	XLOC_060054	0.956368	4.16e-06
TCONS_00010589	102174897	LOC102174897	Novel_lncRNA	XLOC_060054	XLOC_060054	0.956368	4.16e-06
TCONS_00078993	102174160	RNF180	Novel_lncRNA	XLOC_060054	XLOC_060054	0.956368	4.16e-06
TCONS_00079344	102171102	NIPBL	Novel_lncRNA	XLOC_060054	XLOC_060054	0.956368	4.16e-06
TCONS_00075436	XLOC_048175	XLOC_048175	Novel_lncRNA	XLOC_060054	XLOC_060054	0.956368	4.16e-06
TCONS_00034293	102186591	BNC2	Novel_lncRNA	XLOC_060054	XLOC_060054	0.956368	4.16e-06
TCONS_00036852	102183872	SHB	Novel_lncRNA	XLOC_060054	XLOC_060054	0.956368	4.16e-06
TCONS_00040550	102190605	CNKSR3	Novel_lncRNA	XLOC_060054	XLOC_060054	0.956368	4.16e-06
TCONS_00021876	102168517	DUSP16	Novel_lncRNA	XLOC_060054	XLOC_060054	0.956368	4.16e-06
TCONS_00105078	108634775	LOC108634775	Novel_lncRNA	102190431	SGK2	0.95637	4.16e-06
TCONS_00025728	102176770	PPP3CA	Novel_lncRNA	102177553	ANAPC10	0.956374	4.16e-06
TCONS_00063500	102187614	PLD5	Novel_lncRNA	102191138	PDSS2	0.956375	4.16e-06
TCONS_00107456	XLOC_068302	XLOC_068302	Novel_lncRNA	108634333	LOC108634333	0.95638	4.16e-06
TCONS_00051588	102191627	PCCA	Novel_lncRNA	108636534	LOC108636534	0.956387	4.15e-06
TCONS_00010364	102178786	PPCS	Novel_lncRNA	XLOC_060621	XLOC_060621	0.956395	4.15e-06
TCONS_00035964	102169005	SH3RF1	Novel_lncRNA	XLOC_026682	XLOC_026682	0.956398	4.15e-06
TCONS_00062165	102189776	PLEKHA7	Novel_lncRNA	108634776	LOC108634776	0.956401	4.15e-06
TCONS_00097124	102188740	VCL	Novel_lncRNA	102173098	LOC102173098	0.95641	4.14e-06
TCONS_00026726	XLOC_017040	XLOC_017040	Novel_lncRNA	XLOC_017040	XLOC_017040	0.956415	4.14e-06
TCONS_00107085	XLOC_068035	XLOC_068035	Novel_lncRNA	102182011	LOC102182011	0.956417	4.14e-06
TCONS_00028890	102184717	EFNA5	Novel_lncRNA	102182011	LOC102182011	0.956417	4.14e-06
TCONS_00101113	102189748	TBL1X	Novel_lncRNA	102182011	LOC102182011	0.956417	4.14e-06
TCONS_00107086	XLOC_068035	XLOC_068035	Novel_lncRNA	102182011	LOC102182011	0.956417	4.14e-06
TCONS_00107135	108635404	LOC108635404	Novel_lncRNA	102182011	LOC102182011	0.956417	4.14e-06
TCONS_00107141	108635404	LOC108635404	Novel_lncRNA	102182011	LOC102182011	0.956417	4.14e-06
TCONS_00059256	102187511	CELF1	Novel_lncRNA	102182011	LOC102182011	0.956417	4.14e-06
TCONS_00062540	102174049	ZC3H12C	Novel_lncRNA	102182011	LOC102182011	0.956417	4.14e-06
TCONS_00062935	102183894	PRELP	Novel_lncRNA	102182011	LOC102182011	0.956417	4.14e-06
TCONS_00106358	XLOC_067486	XLOC_067486	Novel_lncRNA	102182011	LOC102182011	0.956417	4.14e-06
TCONS_00010589	102174897	LOC102174897	Novel_lncRNA	102182011	LOC102182011	0.956417	4.14e-06
TCONS_00078993	102174160	RNF180	Novel_lncRNA	102182011	LOC102182011	0.956417	4.14e-06
TCONS_00078182	102169909	ARL15	Novel_lncRNA	102182011	LOC102182011	0.956417	4.14e-06
TCONS_00079344	102171102	NIPBL	Novel_lncRNA	102182011	LOC102182011	0.956417	4.14e-06
TCONS_00075436	XLOC_048175	XLOC_048175	Novel_lncRNA	102182011	LOC102182011	0.956417	4.14e-06
TCONS_00034293	102186591	BNC2	Novel_lncRNA	102182011	LOC102182011	0.956417	4.14e-06
TCONS_00036852	102183872	SHB	Novel_lncRNA	102182011	LOC102182011	0.956417	4.14e-06
TCONS_00040550	102190605	CNKSR3	Novel_lncRNA	102182011	LOC102182011	0.956417	4.14e-06
TCONS_00021876	102168517	DUSP16	Novel_lncRNA	102182011	LOC102182011	0.956417	4.14e-06
TCONS_00026726	XLOC_017040	XLOC_017040	Novel_lncRNA	102169869	IFT74	0.956417	4.14e-06
TCONS_00037564	102170234	LOC102170234	Novel_lncRNA	102187187	IMMP2L	0.956419	4.14e-06
TCONS_00047284	102174942	PUM2	Novel_lncRNA	102187187	IMMP2L	0.956422	4.14e-06
TCONS_00025728	102176770	PPP3CA	Novel_lncRNA	108634333	LOC108634333	0.95644	4.13e-06
TCONS_00100202	102185993	ATP7A	Novel_lncRNA	102170740	CMTM8	0.956452	4.13e-06
TCONS_00026726	XLOC_017040	XLOC_017040	Novel_lncRNA	102185335	UMAD1	0.956453	4.12e-06
TCONS_00016399	102189827	CNOT4	Novel_lncRNA	102188518	LOC102188518	0.956468	4.12e-06
TCONS_00105053	108634775	LOC108634775	Novel_lncRNA	102187187	IMMP2L	0.956475	4.12e-06
TCONS_00028876	102181389	FBXL17	Novel_lncRNA	1485867	ND6	0.956492	4.11e-06
TCONS_00004634	102173974	DNAJC13	Novel_lncRNA	XLOC_062680	XLOC_062680	0.956497	4.11e-06
TCONS_00035964	102169005	SH3RF1	Novel_lncRNA	102182011	LOC102182011	0.95651	4.1e-06
TCONS_00107074	XLOC_068033	XLOC_068033	Novel_lncRNA	102188506	LOC102188506	0.956534	4.09e-06
TCONS_00107089	XLOC_068035	XLOC_068035	Novel_lncRNA	XLOC_060054	XLOC_060054	0.956538	4.09e-06
TCONS_00104359	108634655	LOC108634655	Novel_lncRNA	XLOC_046524	XLOC_046524	0.956543	4.09e-06
TCONS_00038362	102191138	PDSS2	Novel_lncRNA	108634776	LOC108634776	0.956547	4.09e-06
TCONS_00051432	XLOC_032990	XLOC_032990	Novel_lncRNA	108636534	LOC108636534	0.956549	4.08e-06
TCONS_00017375	102185804	GNAI1	Novel_lncRNA	XLOC_060054	XLOC_060054	0.956549	4.08e-06
TCONS_00083277	102182265	C22H3orf67	Novel_lncRNA	102172461	ZNF623	0.956556	4.08e-06
TCONS_00045522	102183148	MCC	Novel_lncRNA	102188466	WASL	0.956556	4.08e-06
TCONS_00105602	108634845	LOC108634845	Novel_lncRNA	102187134	ZCCHC7	0.956573	4.07e-06
TCONS_00107074	XLOC_068033	XLOC_068033	Novel_lncRNA	108634333	LOC108634333	0.95658	4.07e-06
TCONS_00098561	XLOC_062381	XLOC_062381	Novel_lncRNA	108635303	LOC108635303	0.956584	4.07e-06
TCONS_00002588	XLOC_001767	XLOC_001767	Novel_lncRNA	102168890	ARID2	0.956588	4.07e-06
TCONS_00107129	108635404	LOC108635404	Novel_lncRNA	102189948	LOC102189948	0.95659	4.07e-06
TCONS_00004633	102173974	DNAJC13	Novel_lncRNA	102173909	LOC102173909	0.956592	4.07e-06
TCONS_00006790	XLOC_004475	XLOC_004475	Novel_lncRNA	XLOC_054487	XLOC_054487	0.956595	4.07e-06
TCONS_00004634	102173974	DNAJC13	Novel_lncRNA	XLOC_061297	XLOC_061297	0.956595	4.07e-06
TCONS_00106268	108635079	LOC108635079	Novel_lncRNA	XLOC_060963	XLOC_060963	0.956598	4.06e-06
TCONS_00105665	XLOC_066994	XLOC_066994	Novel_lncRNA	102185335	UMAD1	0.956601	4.06e-06
XR_001917334.1	106503653	LOC106503653	Annotated_lncRNA	102174997	SUN3	0.956601	4.06e-06
TCONS_00019805	102178594	ANKIB1	Novel_lncRNA	102173909	LOC102173909	0.956604	4.06e-06
TCONS_00105078	108634775	LOC108634775	Novel_lncRNA	102175089	CUTC	0.956609	4.06e-06
TCONS_00010364	102178786	PPCS	Novel_lncRNA	XLOC_046524	XLOC_046524	0.956618	4.06e-06
TCONS_00047284	102174942	PUM2	Novel_lncRNA	102184378	MCF2L2	0.956632	4.05e-06
TCONS_00051588	102191627	PCCA	Novel_lncRNA	1485866	ND5	0.956637	4.05e-06
TCONS_00021890	102177417	LRP6	Novel_lncRNA	XLOC_060621	XLOC_060621	0.956647	4.04e-06
TCONS_00107456	XLOC_068302	XLOC_068302	Novel_lncRNA	108634846	LOC108634846	0.95665	4.04e-06
TCONS_00049912	102181507	STRBP	Novel_lncRNA	102191645	C19H17orf64	0.956671	4.03e-06
TCONS_00104359	108634655	LOC108634655	Novel_lncRNA	XLOC_019581	XLOC_019581	0.956694	4.02e-06
TCONS_00035964	102169005	SH3RF1	Novel_lncRNA	XLOC_060054	XLOC_060054	0.956699	4.02e-06
TCONS_00004633	102173974	DNAJC13	Novel_lncRNA	108635301	LOC108635301	0.956703	4.02e-06
TCONS_00107093	XLOC_068035	XLOC_068035	Novel_lncRNA	XLOC_054487	XLOC_054487	0.956709	4.02e-06
TCONS_00105078	108634775	LOC108634775	Novel_lncRNA	102181443	INO80D	0.956711	4.02e-06
TCONS_00025728	102176770	PPP3CA	Novel_lncRNA	XLOC_017694	XLOC_017694	0.956711	4.02e-06
TCONS_00037564	102170234	LOC102170234	Novel_lncRNA	102176075	NR1I2	0.956711	4.02e-06
TCONS_00107456	XLOC_068302	XLOC_068302	Novel_lncRNA	102178786	PPCS	0.956722	4.01e-06
TCONS_00063500	102187614	PLD5	Novel_lncRNA	108635404	LOC108635404	0.956726	4.01e-06
TCONS_00013064	102174535	AGAP1	Novel_lncRNA	102171767	LOC102171767	0.956738	4.01e-06
TCONS_00004634	102173974	DNAJC13	Novel_lncRNA	102173013	FBXO11	0.956745	4e-06
TCONS_00006790	XLOC_004475	XLOC_004475	Novel_lncRNA	102189948	LOC102189948	0.956748	4e-06
TCONS_00100202	102185993	ATP7A	Novel_lncRNA	XLOC_017040	XLOC_017040	0.956751	4e-06
TCONS_00107456	XLOC_068302	XLOC_068302	Novel_lncRNA	108636534	LOC108636534	0.956755	4e-06
TCONS_00104359	108634655	LOC108634655	Novel_lncRNA	102188518	LOC102188518	0.956778	3.99e-06
TCONS_00098561	XLOC_062381	XLOC_062381	Novel_lncRNA	106502417	LOC106502417	0.95678	3.99e-06
TCONS_00107089	XLOC_068035	XLOC_068035	Novel_lncRNA	XLOC_054487	XLOC_054487	0.956782	3.99e-06
TCONS_00016399	102189827	CNOT4	Novel_lncRNA	XLOC_038936	XLOC_038936	0.956787	3.99e-06
TCONS_00101125	108634335	SHROOM2	Novel_lncRNA	XLOC_060963	XLOC_060963	0.956788	3.99e-06
TCONS_00006790	XLOC_004475	XLOC_004475	Novel_lncRNA	102182011	LOC102182011	0.9568	3.98e-06
TCONS_00083277	102182265	C22H3orf67	Novel_lncRNA	102173098	LOC102173098	0.956804	3.98e-06
TCONS_00048653	102180678	MAP4K3	Novel_lncRNA	102181263	HDAC9	0.956818	3.97e-06
XR_001917274.1	102171119	LOC102171119	Annotated_lncRNA	102177727	LOC102177727	0.956827	3.97e-06
TCONS_00104357	108634655	LOC108634655	Novel_lncRNA	102175089	CUTC	0.956832	3.97e-06
XR_001917274.1	102171119	LOC102171119	Annotated_lncRNA	108636534	LOC108636534	0.956842	3.96e-06
TCONS_00051432	XLOC_032990	XLOC_032990	Novel_lncRNA	XLOC_060054	XLOC_060054	0.956846	3.96e-06
TCONS_00026726	XLOC_017040	XLOC_017040	Novel_lncRNA	102190095	SDK1	0.956848	3.96e-06
TCONS_00063500	102187614	PLD5	Novel_lncRNA	XLOC_015959	XLOC_015959	0.956853	3.96e-06
TCONS_00037564	102170234	LOC102170234	Novel_lncRNA	XLOC_053136	XLOC_053136	0.956878	3.95e-06
TCONS_00098561	XLOC_062381	XLOC_062381	Novel_lncRNA	XLOC_029270	XLOC_029270	0.956889	3.94e-06
TCONS_00063500	102187614	PLD5	Novel_lncRNA	XLOC_017040	XLOC_017040	0.95691	3.94e-06
TCONS_00025728	102176770	PPP3CA	Novel_lncRNA	108634746	LOC108634746	0.956912	3.94e-06
TCONS_00062165	102189776	PLEKHA7	Novel_lncRNA	108636938	TRNAC-GCA	0.956915	3.93e-06
TCONS_00025728	102176770	PPP3CA	Novel_lncRNA	108634846	LOC108634846	0.956935	3.93e-06
XR_001917334.1	106503653	LOC106503653	Annotated_lncRNA	108634776	LOC108634776	0.956948	3.92e-06
TCONS_00063500	102187614	PLD5	Novel_lncRNA	106502976	NPHP4	0.956959	3.92e-06
TCONS_00100203	102185993	ATP7A	Novel_lncRNA	106502417	LOC106502417	0.956965	3.91e-06
TCONS_00025728	102176770	PPP3CA	Novel_lncRNA	102168641	SFTPB	0.95697	3.91e-06
TCONS_00028876	102181389	FBXL17	Novel_lncRNA	102182011	LOC102182011	0.956972	3.91e-06
TCONS_00071133	102173960	DNAJA2	Novel_lncRNA	102178628	MNAT1	0.956979	3.91e-06
TCONS_00100203	102185993	ATP7A	Novel_lncRNA	102191716	ERICH5	0.95698	3.91e-06
TCONS_00107136	108635404	LOC108635404	Novel_lncRNA	102186094	DEPDC4	0.95698	3.91e-06
TCONS_00107074	XLOC_068033	XLOC_068033	Novel_lncRNA	XLOC_017694	XLOC_017694	0.956982	3.91e-06
TCONS_00004634	102173974	DNAJC13	Novel_lncRNA	108636938	TRNAC-GCA	0.957001	3.9e-06
TCONS_00097124	102188740	VCL	Novel_lncRNA	102175089	CUTC	0.957036	3.89e-06
TCONS_00056769	102190335	SPAG1	Novel_lncRNA	108635081	LOC108635081	0.957058	3.88e-06
TCONS_00049912	102181507	STRBP	Novel_lncRNA	102179070	CAPS2	0.957059	3.88e-06
TCONS_00107085	XLOC_068035	XLOC_068035	Novel_lncRNA	102175089	CUTC	0.957062	3.88e-06
TCONS_00028890	102184717	EFNA5	Novel_lncRNA	102175089	CUTC	0.957062	3.88e-06
TCONS_00101113	102189748	TBL1X	Novel_lncRNA	102175089	CUTC	0.957062	3.88e-06
TCONS_00107086	XLOC_068035	XLOC_068035	Novel_lncRNA	102175089	CUTC	0.957062	3.88e-06
TCONS_00107135	108635404	LOC108635404	Novel_lncRNA	102175089	CUTC	0.957062	3.88e-06
TCONS_00107141	108635404	LOC108635404	Novel_lncRNA	102175089	CUTC	0.957062	3.88e-06
TCONS_00059256	102187511	CELF1	Novel_lncRNA	102175089	CUTC	0.957062	3.88e-06
TCONS_00062540	102174049	ZC3H12C	Novel_lncRNA	102175089	CUTC	0.957062	3.88e-06
TCONS_00062935	102183894	PRELP	Novel_lncRNA	102175089	CUTC	0.957062	3.88e-06
TCONS_00106358	XLOC_067486	XLOC_067486	Novel_lncRNA	102175089	CUTC	0.957062	3.88e-06
TCONS_00010589	102174897	LOC102174897	Novel_lncRNA	102175089	CUTC	0.957062	3.88e-06
TCONS_00078993	102174160	RNF180	Novel_lncRNA	102175089	CUTC	0.957062	3.88e-06
TCONS_00078182	102169909	ARL15	Novel_lncRNA	102175089	CUTC	0.957062	3.88e-06
TCONS_00079344	102171102	NIPBL	Novel_lncRNA	102175089	CUTC	0.957062	3.88e-06
TCONS_00075436	XLOC_048175	XLOC_048175	Novel_lncRNA	102175089	CUTC	0.957062	3.88e-06
TCONS_00034293	102186591	BNC2	Novel_lncRNA	102175089	CUTC	0.957062	3.88e-06
TCONS_00036852	102183872	SHB	Novel_lncRNA	102175089	CUTC	0.957062	3.88e-06
TCONS_00040550	102190605	CNKSR3	Novel_lncRNA	102175089	CUTC	0.957062	3.88e-06
TCONS_00021876	102168517	DUSP16	Novel_lncRNA	102175089	CUTC	0.957062	3.88e-06
TCONS_00019805	102178594	ANKIB1	Novel_lncRNA	102188466	WASL	0.957065	3.87e-06
TCONS_00100381	102179748	OPHN1	Novel_lncRNA	102173098	LOC102173098	0.957067	3.87e-06
TCONS_00017375	102185804	GNAI1	Novel_lncRNA	XLOC_017040	XLOC_017040	0.957068	3.87e-06
TCONS_00004634	102173974	DNAJC13	Novel_lncRNA	102188506	LOC102188506	0.957087	3.87e-06
TCONS_00104874	108634747	LOC108634747	Novel_lncRNA	102182831	CCDC127	0.957089	3.86e-06
TCONS_00107136	108635404	LOC108635404	Novel_lncRNA	XLOC_063549	XLOC_063549	0.957092	3.86e-06
TCONS_00062816	102169778	DCUN1D5	Novel_lncRNA	108635964	TRNAC-GCA	0.957103	3.86e-06
TCONS_00014574	XLOC_009163	XLOC_009163	Novel_lncRNA	XLOC_026682	XLOC_026682	0.957105	3.86e-06
TCONS_00004634	102173974	DNAJC13	Novel_lncRNA	102183148	MCC	0.957109	3.86e-06
TCONS_00026726	XLOC_017040	XLOC_017040	Novel_lncRNA	102188518	LOC102188518	0.957117	3.85e-06
TCONS_00107136	108635404	LOC108635404	Novel_lncRNA	102168514	LOC102168514	0.957131	3.85e-06
TCONS_00104890	108634747	LOC108634747	Novel_lncRNA	102189948	LOC102189948	0.957143	3.84e-06
TCONS_00104890	108634747	LOC108634747	Novel_lncRNA	102175089	CUTC	0.957163	3.83e-06
TCONS_00062816	102169778	DCUN1D5	Novel_lncRNA	XLOC_046524	XLOC_046524	0.957165	3.83e-06
TCONS_00016399	102189827	CNOT4	Novel_lncRNA	102191543	NME7	0.957183	3.83e-06
TCONS_00062165	102189776	PLEKHA7	Novel_lncRNA	102178786	PPCS	0.957197	3.82e-06
TCONS_00106268	108635079	LOC108635079	Novel_lncRNA	108636534	LOC108636534	0.957202	3.82e-06
TCONS_00010364	102178786	PPCS	Novel_lncRNA	108634775	LOC108634775	0.957214	3.81e-06
TCONS_00001068	102189992	P3H2	Novel_lncRNA	102170740	CMTM8	0.957234	3.81e-06
TCONS_00107034	XLOC_067998	XLOC_067998	Novel_lncRNA	102171067	GDA	0.957236	3.81e-06
TCONS_00062816	102169778	DCUN1D5	Novel_lncRNA	108634333	LOC108634333	0.957237	3.81e-06
TCONS_00037564	102170234	LOC102170234	Novel_lncRNA	108637248	LOC108637248	0.957241	3.8e-06
TCONS_00001068	102189992	P3H2	Novel_lncRNA	XLOC_017040	XLOC_017040	0.957242	3.8e-06
TCONS_00063500	102187614	PLD5	Novel_lncRNA	102181635	FHIT	0.957247	3.8e-06
TCONS_00035964	102169005	SH3RF1	Novel_lncRNA	102169869	IFT74	0.957251	3.8e-06
TCONS_00107089	XLOC_068035	XLOC_068035	Novel_lncRNA	102189948	LOC102189948	0.957281	3.79e-06
TCONS_00105053	108634775	LOC108634775	Novel_lncRNA	XLOC_017040	XLOC_017040	0.957292	3.78e-06
XR_001917274.1	102171119	LOC102171119	Annotated_lncRNA	102187138	C10H15orf65	0.957293	3.78e-06
TCONS_00004691	102176274	ATP2C1	Novel_lncRNA	108634770	LOC108634770	0.957293	3.78e-06
TCONS_00062851	102168651	PDGFD	Novel_lncRNA	102186456	VWDE	0.957296	3.78e-06
TCONS_00107129	108635404	LOC108635404	Novel_lncRNA	102186094	DEPDC4	0.957306	3.78e-06
TCONS_00049912	102181507	STRBP	Novel_lncRNA	102171417	LOC102171417	0.957307	3.78e-06
TCONS_00079345	102171102	NIPBL	Novel_lncRNA	102190740	GTDC1	0.957341	3.76e-06
TCONS_00017375	102185804	GNAI1	Novel_lncRNA	XLOC_025775	XLOC_025775	0.957351	3.76e-06
TCONS_00100203	102185993	ATP7A	Novel_lncRNA	108634746	LOC108634746	0.957365	3.76e-06
TCONS_00104357	108634655	LOC108634655	Novel_lncRNA	XLOC_054487	XLOC_054487	0.957365	3.76e-06
TCONS_00107136	108635404	LOC108635404	Novel_lncRNA	100861211	BMPR1B	0.957371	3.75e-06
TCONS_00009736	XLOC_006211	XLOC_006211	Novel_lncRNA	102169752	SRFBP1	0.957373	3.75e-06
TCONS_00006790	XLOC_004475	XLOC_004475	Novel_lncRNA	102169869	IFT74	0.957373	3.75e-06
TCONS_00037564	102170234	LOC102170234	Novel_lncRNA	106502327	LOC106502327	0.957379	3.75e-06
TCONS_00026726	XLOC_017040	XLOC_017040	Novel_lncRNA	102172461	ZNF623	0.957396	3.74e-06
TCONS_00016399	102189827	CNOT4	Novel_lncRNA	102173013	FBXO11	0.957399	3.74e-06
TCONS_00016399	102189827	CNOT4	Novel_lncRNA	102169186	LOC102169186	0.957402	3.74e-06
TCONS_00028876	102181389	FBXL17	Novel_lncRNA	XLOC_028036	XLOC_028036	0.957411	3.74e-06
TCONS_00004633	102173974	DNAJC13	Novel_lncRNA	102188466	WASL	0.95742	3.73e-06
TCONS_00071133	102173960	DNAJA2	Novel_lncRNA	102168649	NBN	0.95743	3.73e-06
TCONS_00107085	XLOC_068035	XLOC_068035	Novel_lncRNA	XLOC_054487	XLOC_054487	0.957435	3.73e-06
TCONS_00017375	102185804	GNAI1	Novel_lncRNA	102177553	ANAPC10	0.957435	3.73e-06
TCONS_00028890	102184717	EFNA5	Novel_lncRNA	XLOC_054487	XLOC_054487	0.957436	3.73e-06
TCONS_00101113	102189748	TBL1X	Novel_lncRNA	XLOC_054487	XLOC_054487	0.957436	3.73e-06
TCONS_00107086	XLOC_068035	XLOC_068035	Novel_lncRNA	XLOC_054487	XLOC_054487	0.957436	3.73e-06
TCONS_00107135	108635404	LOC108635404	Novel_lncRNA	XLOC_054487	XLOC_054487	0.957436	3.73e-06
TCONS_00107141	108635404	LOC108635404	Novel_lncRNA	XLOC_054487	XLOC_054487	0.957436	3.73e-06
TCONS_00059256	102187511	CELF1	Novel_lncRNA	XLOC_054487	XLOC_054487	0.957436	3.73e-06
TCONS_00062540	102174049	ZC3H12C	Novel_lncRNA	XLOC_054487	XLOC_054487	0.957436	3.73e-06
TCONS_00062935	102183894	PRELP	Novel_lncRNA	XLOC_054487	XLOC_054487	0.957436	3.73e-06
TCONS_00106358	XLOC_067486	XLOC_067486	Novel_lncRNA	XLOC_054487	XLOC_054487	0.957436	3.73e-06
TCONS_00010589	102174897	LOC102174897	Novel_lncRNA	XLOC_054487	XLOC_054487	0.957436	3.73e-06
TCONS_00078993	102174160	RNF180	Novel_lncRNA	XLOC_054487	XLOC_054487	0.957436	3.73e-06
TCONS_00078182	102169909	ARL15	Novel_lncRNA	XLOC_054487	XLOC_054487	0.957436	3.73e-06
TCONS_00079344	102171102	NIPBL	Novel_lncRNA	XLOC_054487	XLOC_054487	0.957436	3.73e-06
TCONS_00075436	XLOC_048175	XLOC_048175	Novel_lncRNA	XLOC_054487	XLOC_054487	0.957436	3.73e-06
TCONS_00034293	102186591	BNC2	Novel_lncRNA	XLOC_054487	XLOC_054487	0.957436	3.73e-06
TCONS_00036852	102183872	SHB	Novel_lncRNA	XLOC_054487	XLOC_054487	0.957436	3.73e-06
TCONS_00040550	102190605	CNKSR3	Novel_lncRNA	XLOC_054487	XLOC_054487	0.957436	3.73e-06
TCONS_00021876	102168517	DUSP16	Novel_lncRNA	XLOC_054487	XLOC_054487	0.957436	3.73e-06
TCONS_00025728	102176770	PPP3CA	Novel_lncRNA	108635242	LOC108635242	0.957442	3.73e-06
TCONS_00105602	108634845	LOC108634845	Novel_lncRNA	102171067	GDA	0.957447	3.72e-06
TCONS_00025728	102176770	PPP3CA	Novel_lncRNA	102188518	LOC102188518	0.957461	3.72e-06
TCONS_00107129	108635404	LOC108635404	Novel_lncRNA	102169869	IFT74	0.957462	3.72e-06
TCONS_00105665	XLOC_066994	XLOC_066994	Novel_lncRNA	XLOC_028036	XLOC_028036	0.957477	3.71e-06
TCONS_00104359	108634655	LOC108634655	Novel_lncRNA	102174997	SUN3	0.95748	3.71e-06
TCONS_00037564	102170234	LOC102170234	Novel_lncRNA	102178628	MNAT1	0.957481	3.71e-06
TCONS_00028876	102181389	FBXL17	Novel_lncRNA	102189948	LOC102189948	0.957487	3.71e-06
TCONS_00105602	108634845	LOC108634845	Novel_lncRNA	XLOC_026682	XLOC_026682	0.957487	3.71e-06
TCONS_00028876	102181389	FBXL17	Novel_lncRNA	102191614	GRIN3A	0.957492	3.71e-06
TCONS_00105068	108634775	LOC108634775	Novel_lncRNA	102172665	CWC27	0.957497	3.7e-06
TCONS_00105665	XLOC_066994	XLOC_066994	Novel_lncRNA	102189074	ISL2	0.957505	3.7e-06
TCONS_00078666	102182831	CCDC127	Novel_lncRNA	108634774	LOC108634774	0.957506	3.7e-06
TCONS_00046774	XLOC_030088	XLOC_030088	Novel_lncRNA	102181635	FHIT	0.957514	3.7e-06
TCONS_00025728	102176770	PPP3CA	Novel_lncRNA	102178786	PPCS	0.957518	3.7e-06
TCONS_00063500	102187614	PLD5	Novel_lncRNA	XLOC_063489	XLOC_063489	0.957522	3.69e-06
TCONS_00101125	108634335	SHROOM2	Novel_lncRNA	102189948	LOC102189948	0.957523	3.69e-06
TCONS_00105602	108634845	LOC108634845	Novel_lncRNA	102168514	LOC102168514	0.957525	3.69e-06
TCONS_00097124	102188740	VCL	Novel_lncRNA	108638412	LOC108638412	0.957532	3.69e-06
TCONS_00038362	102191138	PDSS2	Novel_lncRNA	102185014	KBTBD3	0.957539	3.69e-06
TCONS_00101125	108634335	SHROOM2	Novel_lncRNA	XLOC_025775	XLOC_025775	0.957562	3.68e-06
TCONS_00037564	102170234	LOC102170234	Novel_lncRNA	102191716	ERICH5	0.957564	3.68e-06
TCONS_00089728	102168225	MYO5B	Novel_lncRNA	XLOC_004381	XLOC_004381	0.957566	3.68e-06
TCONS_00007312	102186529	FAM171B	Novel_lncRNA	1485866	ND5	0.957573	3.67e-06
TCONS_00100202	102185993	ATP7A	Novel_lncRNA	1485867	ND6	0.957575	3.67e-06
TCONS_00063391	102169401	AHCTF1	Novel_lncRNA	102175089	CUTC	0.957575	3.67e-06
TCONS_00014574	XLOC_009163	XLOC_009163	Novel_lncRNA	102189948	LOC102189948	0.957579	3.67e-06
TCONS_00049912	102181507	STRBP	Novel_lncRNA	108635155	LOC108635155	0.957595	3.67e-06
TCONS_00035962	102169005	SH3RF1	Novel_lncRNA	XLOC_060621	XLOC_060621	0.957605	3.66e-06
TCONS_00063391	102169401	AHCTF1	Novel_lncRNA	XLOC_060054	XLOC_060054	0.957606	3.66e-06
TCONS_00104359	108634655	LOC108634655	Novel_lncRNA	XLOC_017040	XLOC_017040	0.957606	3.66e-06
TCONS_00049912	102181507	STRBP	Novel_lncRNA	108637086	LOC108637086	0.957607	3.66e-06
TCONS_00104874	108634747	LOC108634747	Novel_lncRNA	102187134	ZCCHC7	0.957611	3.66e-06
TCONS_00107074	XLOC_068033	XLOC_068033	Novel_lncRNA	108634456	LOC108634456	0.957615	3.66e-06
TCONS_00016399	102189827	CNOT4	Novel_lncRNA	XLOC_038940	XLOC_038940	0.957617	3.66e-06
TCONS_00107089	XLOC_068035	XLOC_068035	Novel_lncRNA	102175089	CUTC	0.957635	3.65e-06
XR_001917274.1	102171119	LOC102171119	Annotated_lncRNA	108636938	TRNAC-GCA	0.957646	3.65e-06
TCONS_00097124	102188740	VCL	Novel_lncRNA	102178302	CFAP52	0.95765	3.64e-06
TCONS_00063500	102187614	PLD5	Novel_lncRNA	XLOC_063549	XLOC_063549	0.957654	3.64e-06
TCONS_00051432	XLOC_032990	XLOC_032990	Novel_lncRNA	102186177	RNLS	0.957664	3.64e-06
TCONS_00107456	XLOC_068302	XLOC_068302	Novel_lncRNA	102171194	TTC23	0.957673	3.64e-06
TCONS_00049912	102181507	STRBP	Novel_lncRNA	102182306	RFX3	0.957673	3.64e-06
XR_001917334.1	106503653	LOC106503653	Annotated_lncRNA	102189948	LOC102189948	0.95768	3.63e-06
TCONS_00063500	102187614	PLD5	Novel_lncRNA	106502021	MAGI2	0.957688	3.63e-06
XR_001917334.1	106503653	LOC106503653	Annotated_lncRNA	102187187	IMMP2L	0.957691	3.63e-06
TCONS_00009331	102188539	ITGB6	Novel_lncRNA	108636534	LOC108636534	0.957693	3.63e-06
TCONS_00048653	102180678	MAP4K3	Novel_lncRNA	XLOC_017040	XLOC_017040	0.957697	3.63e-06
TCONS_00036044	108636534	LOC108636534	Novel_lncRNA	102174997	SUN3	0.957709	3.62e-06
TCONS_00009736	XLOC_006211	XLOC_006211	Novel_lncRNA	102180516	C15H11orf42	0.957709	3.62e-06
TCONS_00083277	102182265	C22H3orf67	Novel_lncRNA	102187187	IMMP2L	0.957711	3.62e-06
TCONS_00079345	102171102	NIPBL	Novel_lncRNA	102169869	IFT74	0.957718	3.62e-06
TCONS_00000861	102188353	HSPBAP1	Novel_lncRNA	108638412	LOC108638412	0.957719	3.62e-06
TCONS_00062165	102189776	PLEKHA7	Novel_lncRNA	102175089	CUTC	0.957719	3.62e-06
TCONS_00083277	102182265	C22H3orf67	Novel_lncRNA	108636534	LOC108636534	0.957721	3.62e-06
TCONS_00107456	XLOC_068302	XLOC_068302	Novel_lncRNA	108634747	LOC108634747	0.957745	3.61e-06
TCONS_00051432	XLOC_032990	XLOC_032990	Novel_lncRNA	102190528	TDRD3	0.957748	3.61e-06
TCONS_00004633	102173974	DNAJC13	Novel_lncRNA	108636534	LOC108636534	0.957749	3.61e-06
TCONS_00093961	102190578	GRK5	Novel_lncRNA	102173098	LOC102173098	0.957754	3.61e-06
TCONS_00004633	102173974	DNAJC13	Novel_lncRNA	102180516	C15H11orf42	0.957762	3.6e-06
TCONS_00004691	102176274	ATP2C1	Novel_lncRNA	102169752	SRFBP1	0.95777	3.6e-06
TCONS_00025728	102176770	PPP3CA	Novel_lncRNA	102188466	WASL	0.957799	3.59e-06
XR_001917334.1	106503653	LOC106503653	Annotated_lncRNA	106502527	LOC106502527	0.957802	3.59e-06
TCONS_00105602	108634845	LOC108634845	Novel_lncRNA	102190431	SGK2	0.957804	3.59e-06
TCONS_00056769	102190335	SPAG1	Novel_lncRNA	XLOC_019581	XLOC_019581	0.957813	3.58e-06
TCONS_00105068	108634775	LOC108634775	Novel_lncRNA	XLOC_017040	XLOC_017040	0.957814	3.58e-06
TCONS_00035964	102169005	SH3RF1	Novel_lncRNA	102175089	CUTC	0.957829	3.58e-06
TCONS_00025728	102176770	PPP3CA	Novel_lncRNA	XLOC_046442	XLOC_046442	0.957832	3.58e-06
TCONS_00017375	102185804	GNAI1	Novel_lncRNA	108634746	LOC108634746	0.957842	3.57e-06
TCONS_00025728	102176770	PPP3CA	Novel_lncRNA	102186604	CFAP77	0.957843	3.57e-06
TCONS_00104359	108634655	LOC108634655	Novel_lncRNA	102189948	LOC102189948	0.957861	3.57e-06
TCONS_00037564	102170234	LOC102170234	Novel_lncRNA	106503826	LOC106503826	0.957864	3.56e-06
TCONS_00100381	102179748	OPHN1	Novel_lncRNA	102172665	CWC27	0.95787	3.56e-06
TCONS_00079345	102171102	NIPBL	Novel_lncRNA	XLOC_046524	XLOC_046524	0.95787	3.56e-06
TCONS_00004691	102176274	ATP2C1	Novel_lncRNA	102171040	LOC102171040	0.957902	3.55e-06
TCONS_00100381	102179748	OPHN1	Novel_lncRNA	102178302	CFAP52	0.957915	3.54e-06
TCONS_00055359	102185932	ABHD12	Novel_lncRNA	102191622	CAMKMT	0.957926	3.54e-06
TCONS_00038362	102191138	PDSS2	Novel_lncRNA	102178628	MNAT1	0.957928	3.54e-06
TCONS_00107074	XLOC_068033	XLOC_068033	Novel_lncRNA	102182011	LOC102182011	0.957935	3.54e-06
TCONS_00026726	XLOC_017040	XLOC_017040	Novel_lncRNA	108634845	LOC108634845	0.957939	3.54e-06
TCONS_00037564	102170234	LOC102170234	Novel_lncRNA	102189076	MBD5	0.957942	3.54e-06
TCONS_00062851	102168651	PDGFD	Novel_lncRNA	102178628	MNAT1	0.957948	3.53e-06
TCONS_00048653	102180678	MAP4K3	Novel_lncRNA	102174689	CA10	0.957956	3.53e-06
TCONS_00104374	108634655	LOC108634655	Novel_lncRNA	102190431	SGK2	0.957959	3.53e-06
TCONS_00046774	XLOC_030088	XLOC_030088	Novel_lncRNA	102190431	SGK2	0.957965	3.53e-06
TCONS_00035964	102169005	SH3RF1	Novel_lncRNA	XLOC_054487	XLOC_054487	0.95797	3.52e-06
TCONS_00049912	102181507	STRBP	Novel_lncRNA	XLOC_001768	XLOC_001768	0.957976	3.52e-06
TCONS_00025728	102176770	PPP3CA	Novel_lncRNA	108635964	TRNAC-GCA	0.957986	3.52e-06
TCONS_00107129	108635404	LOC108635404	Novel_lncRNA	102175089	CUTC	0.957986	3.52e-06
TCONS_00107456	XLOC_068302	XLOC_068302	Novel_lncRNA	102188506	LOC102188506	0.958002	3.51e-06
TCONS_00107456	XLOC_068302	XLOC_068302	Novel_lncRNA	102182306	RFX3	0.958003	3.51e-06
TCONS_00107074	XLOC_068033	XLOC_068033	Novel_lncRNA	102186177	RNLS	0.958008	3.51e-06
TCONS_00093961	102190578	GRK5	Novel_lncRNA	102185014	KBTBD3	0.958009	3.51e-06
TCONS_00035962	102169005	SH3RF1	Novel_lncRNA	102187187	IMMP2L	0.958011	3.51e-06
TCONS_00036044	108636534	LOC108636534	Novel_lncRNA	102176830	SLC9A9	0.958016	3.51e-06
TCONS_00051432	XLOC_032990	XLOC_032990	Novel_lncRNA	1485867	ND6	0.958019	3.51e-06
TCONS_00051058	106502327	LOC106502327	Novel_lncRNA	108636938	TRNAC-GCA	0.958027	3.5e-06
TCONS_00107456	XLOC_068302	XLOC_068302	Novel_lncRNA	XLOC_061297	XLOC_061297	0.958031	3.5e-06
TCONS_00104890	108634747	LOC108634747	Novel_lncRNA	102186094	DEPDC4	0.958039	3.5e-06
TCONS_00047284	102174942	PUM2	Novel_lncRNA	102169186	LOC102169186	0.958039	3.5e-06
TCONS_00063391	102169401	AHCTF1	Novel_lncRNA	102189074	ISL2	0.958041	3.5e-06
TCONS_00025728	102176770	PPP3CA	Novel_lncRNA	102186456	VWDE	0.958044	3.5e-06
TCONS_00017375	102185804	GNAI1	Novel_lncRNA	108635964	TRNAC-GCA	0.958046	3.5e-06
TCONS_00051432	XLOC_032990	XLOC_032990	Novel_lncRNA	XLOC_026682	XLOC_026682	0.95805	3.49e-06
TCONS_00062816	102169778	DCUN1D5	Novel_lncRNA	102181443	INO80D	0.95805	3.49e-06
TCONS_00107456	XLOC_068302	XLOC_068302	Novel_lncRNA	102168641	SFTPB	0.958053	3.49e-06
TCONS_00051588	102191627	PCCA	Novel_lncRNA	XLOC_004381	XLOC_004381	0.958053	3.49e-06
TCONS_00063500	102187614	PLD5	Novel_lncRNA	102175089	CUTC	0.95806	3.49e-06
TCONS_00025728	102176770	PPP3CA	Novel_lncRNA	100861211	BMPR1B	0.958065	3.49e-06
TCONS_00107456	XLOC_068302	XLOC_068302	Novel_lncRNA	102187210	CPT1B	0.958065	3.49e-06
TCONS_00100381	102179748	OPHN1	Novel_lncRNA	102178628	MNAT1	0.958068	3.49e-06
TCONS_00025728	102176770	PPP3CA	Novel_lncRNA	102179544	AHCYL2	0.958081	3.48e-06
TCONS_00027506	100861211	BMPR1B	Novel_lncRNA	102181635	FHIT	0.958094	3.48e-06
TCONS_00104874	108634747	LOC108634747	Novel_lncRNA	102191716	ERICH5	0.958108	3.47e-06
TCONS_00083440	102182642	NT5DC2	Novel_lncRNA	XLOC_060621	XLOC_060621	0.958114	3.47e-06
TCONS_00078666	102182831	CCDC127	Novel_lncRNA	102178302	CFAP52	0.958117	3.47e-06
TCONS_00105068	108634775	LOC108634775	Novel_lncRNA	102181263	HDAC9	0.958119	3.47e-06
XR_001917334.1	106503653	LOC106503653	Annotated_lncRNA	XLOC_060054	XLOC_060054	0.958135	3.46e-06
TCONS_00025728	102176770	PPP3CA	Novel_lncRNA	XLOC_063549	XLOC_063549	0.958138	3.46e-06
TCONS_00083277	102182265	C22H3orf67	Novel_lncRNA	XLOC_060963	XLOC_060963	0.958147	3.46e-06
TCONS_00009736	XLOC_006211	XLOC_006211	Novel_lncRNA	102191622	CAMKMT	0.95816	3.45e-06
TCONS_00055359	102185932	ABHD12	Novel_lncRNA	108636534	LOC108636534	0.95816	3.45e-06
TCONS_00107074	XLOC_068033	XLOC_068033	Novel_lncRNA	106502976	NPHP4	0.958193	3.44e-06
TCONS_00049912	102181507	STRBP	Novel_lncRNA	108634769	LOC108634769	0.958197	3.44e-06
TCONS_00017375	102185804	GNAI1	Novel_lncRNA	102180516	C15H11orf42	0.958198	3.44e-06
TCONS_00079345	102171102	NIPBL	Novel_lncRNA	1485867	ND6	0.958208	3.44e-06
TCONS_00101125	108634335	SHROOM2	Novel_lncRNA	XLOC_054487	XLOC_054487	0.958231	3.43e-06
TCONS_00051588	102191627	PCCA	Novel_lncRNA	XLOC_060621	XLOC_060621	0.95824	3.42e-06
TCONS_00001068	102189992	P3H2	Novel_lncRNA	XLOC_060054	XLOC_060054	0.958251	3.42e-06
TCONS_00104374	108634655	LOC108634655	Novel_lncRNA	102178786	PPCS	0.958255	3.42e-06
TCONS_00016399	102189827	CNOT4	Novel_lncRNA	102181635	FHIT	0.958256	3.42e-06
TCONS_00107093	XLOC_068035	XLOC_068035	Novel_lncRNA	102186177	RNLS	0.958256	3.42e-06
TCONS_00018500	102179544	AHCYL2	Novel_lncRNA	102178302	CFAP52	0.95826	3.42e-06
TCONS_00106268	108635079	LOC108635079	Novel_lncRNA	102183148	MCC	0.958261	3.42e-06
TCONS_00062851	102168651	PDGFD	Novel_lncRNA	102182306	RFX3	0.958268	3.41e-06
TCONS_00016399	102189827	CNOT4	Novel_lncRNA	102186094	DEPDC4	0.958276	3.41e-06
TCONS_00007312	102186529	FAM171B	Novel_lncRNA	102185335	UMAD1	0.95829	3.41e-06
TCONS_00105665	XLOC_066994	XLOC_066994	Novel_lncRNA	102169869	IFT74	0.95829	3.41e-06
TCONS_00104890	108634747	LOC108634747	Novel_lncRNA	102168649	NBN	0.958291	3.41e-06
TCONS_00025728	102176770	PPP3CA	Novel_lncRNA	106502417	LOC106502417	0.958294	3.41e-06
TCONS_00046774	XLOC_030088	XLOC_030088	Novel_lncRNA	108634770	LOC108634770	0.9583	3.4e-06
TCONS_00107093	XLOC_068035	XLOC_068035	Novel_lncRNA	102185335	UMAD1	0.958301	3.4e-06
TCONS_00105602	108634845	LOC108634845	Novel_lncRNA	106502021	MAGI2	0.958303	3.4e-06
TCONS_00028876	102181389	FBXL17	Novel_lncRNA	XLOC_025775	XLOC_025775	0.958304	3.4e-06
TCONS_00026726	XLOC_017040	XLOC_017040	Novel_lncRNA	102178302	CFAP52	0.958312	3.4e-06
TCONS_00009736	XLOC_006211	XLOC_006211	Novel_lncRNA	102171067	GDA	0.958314	3.4e-06
TCONS_00025728	102176770	PPP3CA	Novel_lncRNA	102176235	MSRA	0.958347	3.39e-06
TCONS_00062851	102168651	PDGFD	Novel_lncRNA	102169869	IFT74	0.958358	3.38e-06
TCONS_00026726	XLOC_017040	XLOC_017040	Novel_lncRNA	102181635	FHIT	0.958359	3.38e-06
TCONS_00078666	102182831	CCDC127	Novel_lncRNA	108638412	LOC108638412	0.958361	3.38e-06
TCONS_00025728	102176770	PPP3CA	Novel_lncRNA	102174621	LOC102174621	0.958365	3.38e-06
TCONS_00049912	102181507	STRBP	Novel_lncRNA	XLOC_025773	XLOC_025773	0.958372	3.38e-06
TCONS_00100381	102179748	OPHN1	Novel_lncRNA	102171040	LOC102171040	0.958372	3.38e-06
TCONS_00062816	102169778	DCUN1D5	Novel_lncRNA	102181263	HDAC9	0.958375	3.38e-06
TCONS_00107074	XLOC_068033	XLOC_068033	Novel_lncRNA	102179748	OPHN1	0.9584	3.37e-06
TCONS_00001068	102189992	P3H2	Novel_lncRNA	108635242	LOC108635242	0.9584	3.37e-06
TCONS_00045522	102183148	MCC	Novel_lncRNA	102173909	LOC102173909	0.958415	3.36e-06
XR_001917334.1	106503653	LOC106503653	Annotated_lncRNA	102181443	INO80D	0.958419	3.36e-06
TCONS_00056769	102190335	SPAG1	Novel_lncRNA	102168890	ARID2	0.958421	3.36e-06
TCONS_00037564	102170234	LOC102170234	Novel_lncRNA	102184542	SIK3	0.958438	3.35e-06
TCONS_00006790	XLOC_004475	XLOC_004475	Novel_lncRNA	102189074	ISL2	0.95845	3.35e-06
TCONS_00100203	102185993	ATP7A	Novel_lncRNA	102169186	LOC102169186	0.958451	3.35e-06
TCONS_00107093	XLOC_068035	XLOC_068035	Novel_lncRNA	102189074	ISL2	0.958462	3.34e-06
TCONS_00107074	XLOC_068033	XLOC_068033	Novel_lncRNA	102173909	LOC102173909	0.958465	3.34e-06
TCONS_00079345	102171102	NIPBL	Novel_lncRNA	102183948	STAP1	0.958469	3.34e-06
TCONS_00025728	102176770	PPP3CA	Novel_lncRNA	XLOC_025775	XLOC_025775	0.958482	3.34e-06
TCONS_00083277	102182265	C22H3orf67	Novel_lncRNA	XLOC_019581	XLOC_019581	0.958482	3.34e-06
TCONS_00037564	102170234	LOC102170234	Novel_lncRNA	XLOC_010632	XLOC_010632	0.958486	3.34e-06
TCONS_00025728	102176770	PPP3CA	Novel_lncRNA	102191716	ERICH5	0.958489	3.34e-06
TCONS_00004634	102173974	DNAJC13	Novel_lncRNA	108635079	LOC108635079	0.958493	3.33e-06
TCONS_00045522	102183148	MCC	Novel_lncRNA	102181263	HDAC9	0.958508	3.33e-06
TCONS_00035962	102169005	SH3RF1	Novel_lncRNA	108634845	LOC108634845	0.95852	3.32e-06
TCONS_00038362	102191138	PDSS2	Novel_lncRNA	108636938	TRNAC-GCA	0.958523	3.32e-06
TCONS_00048653	102180678	MAP4K3	Novel_lncRNA	102181635	FHIT	0.958526	3.32e-06
TCONS_00016399	102189827	CNOT4	Novel_lncRNA	102186604	CFAP77	0.958541	3.32e-06
TCONS_00105665	XLOC_066994	XLOC_066994	Novel_lncRNA	102186177	RNLS	0.958544	3.32e-06
TCONS_00105665	XLOC_066994	XLOC_066994	Novel_lncRNA	102191614	GRIN3A	0.958569	3.31e-06
TCONS_00068368	102177553	ANAPC10	Novel_lncRNA	102180516	C15H11orf42	0.958569	3.31e-06
TCONS_00028876	102181389	FBXL17	Novel_lncRNA	108636938	TRNAC-GCA	0.958578	3.3e-06
TCONS_00049912	102181507	STRBP	Novel_lncRNA	XLOC_019242	XLOC_019242	0.9586	3.3e-06
TCONS_00105665	XLOC_066994	XLOC_066994	Novel_lncRNA	102183387	LOC102183387	0.958603	3.29e-06
TCONS_00004634	102173974	DNAJC13	Novel_lncRNA	102179335	ITIH1	0.958622	3.29e-06
TCONS_00097124	102188740	VCL	Novel_lncRNA	108634774	LOC108634774	0.958624	3.29e-06
TCONS_00036044	108636534	LOC108636534	Novel_lncRNA	102173098	LOC102173098	0.958629	3.29e-06
TCONS_00098561	XLOC_062381	XLOC_062381	Novel_lncRNA	108634746	LOC108634746	0.958633	3.28e-06
TCONS_00107074	XLOC_068033	XLOC_068033	Novel_lncRNA	XLOC_010632	XLOC_010632	0.958638	3.28e-06
TCONS_00100381	102179748	OPHN1	Novel_lncRNA	102185014	KBTBD3	0.95864	3.28e-06
TCONS_00083987	102172491	LANCL2	Novel_lncRNA	108636534	LOC108636534	0.958642	3.28e-06
TCONS_00062816	102169778	DCUN1D5	Novel_lncRNA	102190431	SGK2	0.958642	3.28e-06
TCONS_00107034	XLOC_067998	XLOC_067998	Novel_lncRNA	102190740	GTDC1	0.958644	3.28e-06
TCONS_00021890	102177417	LRP6	Novel_lncRNA	108634774	LOC108634774	0.958652	3.28e-06
TCONS_00101125	108634335	SHROOM2	Novel_lncRNA	102190528	TDRD3	0.958657	3.28e-06
TCONS_00101125	108634335	SHROOM2	Novel_lncRNA	XLOC_060054	XLOC_060054	0.958665	3.27e-06
TCONS_00025728	102176770	PPP3CA	Novel_lncRNA	102189074	ISL2	0.958686	3.27e-06
TCONS_00056769	102190335	SPAG1	Novel_lncRNA	102169752	SRFBP1	0.958693	3.26e-06
TCONS_00019805	102178594	ANKIB1	Novel_lncRNA	XLOC_004381	XLOC_004381	0.958708	3.26e-06
TCONS_00036044	108636534	LOC108636534	Novel_lncRNA	108635303	LOC108635303	0.958709	3.26e-06
TCONS_00025728	102176770	PPP3CA	Novel_lncRNA	XLOC_029271	XLOC_029271	0.958717	3.25e-06
TCONS_00107089	XLOC_068035	XLOC_068035	Novel_lncRNA	102189074	ISL2	0.958719	3.25e-06
TCONS_00051058	106502327	LOC106502327	Novel_lncRNA	XLOC_046524	XLOC_046524	0.958726	3.25e-06
TCONS_00100381	102179748	OPHN1	Novel_lncRNA	102169752	SRFBP1	0.95873	3.25e-06
TCONS_00098561	XLOC_062381	XLOC_062381	Novel_lncRNA	108634333	LOC108634333	0.958733	3.25e-06
TCONS_00025728	102176770	PPP3CA	Novel_lncRNA	108634032	LOC108634032	0.958741	3.25e-06
TCONS_00106268	108635079	LOC108635079	Novel_lncRNA	108635081	LOC108635081	0.958744	3.25e-06
TCONS_00107136	108635404	LOC108635404	Novel_lncRNA	102186604	CFAP77	0.958751	3.24e-06
TCONS_00079345	102171102	NIPBL	Novel_lncRNA	106502527	LOC106502527	0.958756	3.24e-06
TCONS_00056769	102190335	SPAG1	Novel_lncRNA	102181443	INO80D	0.95876	3.24e-06
TCONS_00016399	102189827	CNOT4	Novel_lncRNA	108634333	LOC108634333	0.958761	3.24e-06
TCONS_00083987	102172491	LANCL2	Novel_lncRNA	XLOC_060621	XLOC_060621	0.958771	3.24e-06
TCONS_00049912	102181507	STRBP	Novel_lncRNA	108635404	LOC108635404	0.958776	3.23e-06
TCONS_00027506	100861211	BMPR1B	Novel_lncRNA	102173098	LOC102173098	0.958779	3.23e-06
TCONS_00104359	108634655	LOC108634655	Novel_lncRNA	108638412	LOC108638412	0.958787	3.23e-06
TCONS_00037564	102170234	LOC102170234	Novel_lncRNA	102184378	MCF2L2	0.958817	3.22e-06
TCONS_00016399	102189827	CNOT4	Novel_lncRNA	XLOC_044062	XLOC_044062	0.958819	3.22e-06
TCONS_00000861	102188353	HSPBAP1	Novel_lncRNA	102190528	TDRD3	0.958824	3.22e-06
TCONS_00101125	108634335	SHROOM2	Novel_lncRNA	102187187	IMMP2L	0.958825	3.22e-06
TCONS_00104357	108634655	LOC108634655	Novel_lncRNA	102189074	ISL2	0.958836	3.21e-06
TCONS_00105602	108634845	LOC108634845	Novel_lncRNA	102190888	MACROD2	0.958837	3.21e-06
TCONS_00025728	102176770	PPP3CA	Novel_lncRNA	102191543	NME7	0.95884	3.21e-06
TCONS_00089728	102168225	MYO5B	Novel_lncRNA	102188466	WASL	0.958845	3.21e-06
TCONS_00105053	108634775	LOC108634775	Novel_lncRNA	XLOC_022645	XLOC_022645	0.958851	3.21e-06
TCONS_00009736	XLOC_006211	XLOC_006211	Novel_lncRNA	XLOC_011953	XLOC_011953	0.958858	3.21e-06
TCONS_00048653	102180678	MAP4K3	Novel_lncRNA	1485866	ND5	0.958864	3.2e-06
TCONS_00105602	108634845	LOC108634845	Novel_lncRNA	102169752	SRFBP1	0.958871	3.2e-06
TCONS_00107136	108635404	LOC108635404	Novel_lncRNA	XLOC_046524	XLOC_046524	0.958877	3.2e-06
TCONS_00017375	102185804	GNAI1	Novel_lncRNA	XLOC_028036	XLOC_028036	0.958877	3.2e-06
TCONS_00104359	108634655	LOC108634655	Novel_lncRNA	108636534	LOC108636534	0.958878	3.2e-06
TCONS_00049912	102181507	STRBP	Novel_lncRNA	XLOC_064401	XLOC_064401	0.958881	3.2e-06
TCONS_00098561	XLOC_062381	XLOC_062381	Novel_lncRNA	XLOC_000557	XLOC_000557	0.958883	3.2e-06
TCONS_00093961	102190578	GRK5	Novel_lncRNA	102188518	LOC102188518	0.958901	3.19e-06
TCONS_00007312	102186529	FAM171B	Novel_lncRNA	102188466	WASL	0.95891	3.19e-06
TCONS_00014574	XLOC_009163	XLOC_009163	Novel_lncRNA	102187187	IMMP2L	0.958912	3.19e-06
TCONS_00100202	102185993	ATP7A	Novel_lncRNA	102189074	ISL2	0.958913	3.19e-06
TCONS_00107136	108635404	LOC108635404	Novel_lncRNA	102190431	SGK2	0.958915	3.19e-06
TCONS_00063500	102187614	PLD5	Novel_lncRNA	102178786	PPCS	0.958916	3.19e-06
TCONS_00062816	102169778	DCUN1D5	Novel_lncRNA	102186094	DEPDC4	0.95893	3.18e-06
TCONS_00104374	108634655	LOC108634655	Novel_lncRNA	106502527	LOC106502527	0.958936	3.18e-06
TCONS_00051588	102191627	PCCA	Novel_lncRNA	102188466	WASL	0.958938	3.18e-06
TCONS_00025728	102176770	PPP3CA	Novel_lncRNA	XLOC_029998	XLOC_029998	0.95894	3.18e-06
TCONS_00107129	108635404	LOC108635404	Novel_lncRNA	102168649	NBN	0.958942	3.18e-06
TCONS_00105602	108634845	LOC108634845	Novel_lncRNA	102180222	DOCK5	0.958957	3.17e-06
TCONS_00105602	108634845	LOC108634845	Novel_lncRNA	102189074	ISL2	0.958971	3.17e-06
TCONS_00063500	102187614	PLD5	Novel_lncRNA	XLOC_017694	XLOC_017694	0.958973	3.17e-06
TCONS_00051432	XLOC_032990	XLOC_032990	Novel_lncRNA	102185335	UMAD1	0.958974	3.17e-06
TCONS_00049912	102181507	STRBP	Novel_lncRNA	XLOC_029266	XLOC_029266	0.958978	3.16e-06
TCONS_00004634	102173974	DNAJC13	Novel_lncRNA	106502976	NPHP4	0.95899	3.16e-06
TCONS_00007312	102186529	FAM171B	Novel_lncRNA	XLOC_017040	XLOC_017040	0.958993	3.16e-06
TCONS_00051058	106502327	LOC106502327	Novel_lncRNA	102172461	ZNF623	0.959007	3.15e-06
TCONS_00100202	102185993	ATP7A	Novel_lncRNA	XLOC_028036	XLOC_028036	0.95901	3.15e-06
TCONS_00001068	102189992	P3H2	Novel_lncRNA	102183148	MCC	0.959019	3.15e-06
TCONS_00035962	102169005	SH3RF1	Novel_lncRNA	XLOC_004381	XLOC_004381	0.959028	3.15e-06
TCONS_00051432	XLOC_032990	XLOC_032990	Novel_lncRNA	108635081	LOC108635081	0.959028	3.15e-06
TCONS_00045035	102175214	NEO1	Novel_lncRNA	102185014	KBTBD3	0.959035	3.14e-06
TCONS_00107085	XLOC_068035	XLOC_068035	Novel_lncRNA	102189074	ISL2	0.959055	3.14e-06
TCONS_00028890	102184717	EFNA5	Novel_lncRNA	102189074	ISL2	0.959055	3.14e-06
TCONS_00101113	102189748	TBL1X	Novel_lncRNA	102189074	ISL2	0.959055	3.14e-06
TCONS_00107086	XLOC_068035	XLOC_068035	Novel_lncRNA	102189074	ISL2	0.959055	3.14e-06
TCONS_00107135	108635404	LOC108635404	Novel_lncRNA	102189074	ISL2	0.959055	3.14e-06
TCONS_00107141	108635404	LOC108635404	Novel_lncRNA	102189074	ISL2	0.959055	3.14e-06
TCONS_00059256	102187511	CELF1	Novel_lncRNA	102189074	ISL2	0.959055	3.14e-06
TCONS_00062540	102174049	ZC3H12C	Novel_lncRNA	102189074	ISL2	0.959055	3.14e-06
TCONS_00062935	102183894	PRELP	Novel_lncRNA	102189074	ISL2	0.959055	3.14e-06
TCONS_00106358	XLOC_067486	XLOC_067486	Novel_lncRNA	102189074	ISL2	0.959055	3.14e-06
TCONS_00010589	102174897	LOC102174897	Novel_lncRNA	102189074	ISL2	0.959055	3.14e-06
TCONS_00078993	102174160	RNF180	Novel_lncRNA	102189074	ISL2	0.959055	3.14e-06
TCONS_00078182	102169909	ARL15	Novel_lncRNA	102189074	ISL2	0.959055	3.14e-06
TCONS_00079344	102171102	NIPBL	Novel_lncRNA	102189074	ISL2	0.959055	3.14e-06
TCONS_00075436	XLOC_048175	XLOC_048175	Novel_lncRNA	102189074	ISL2	0.959055	3.14e-06
TCONS_00034293	102186591	BNC2	Novel_lncRNA	102189074	ISL2	0.959055	3.14e-06
TCONS_00036852	102183872	SHB	Novel_lncRNA	102189074	ISL2	0.959055	3.14e-06
TCONS_00040550	102190605	CNKSR3	Novel_lncRNA	102189074	ISL2	0.959055	3.14e-06
TCONS_00021876	102168517	DUSP16	Novel_lncRNA	102189074	ISL2	0.959055	3.14e-06
TCONS_00002588	XLOC_001767	XLOC_001767	Novel_lncRNA	102168649	NBN	0.959056	3.14e-06
TCONS_00055359	102185932	ABHD12	Novel_lncRNA	102169752	SRFBP1	0.95907	3.13e-06
TCONS_00104357	108634655	LOC108634655	Novel_lncRNA	102185335	UMAD1	0.959074	3.13e-06
TCONS_00106268	108635079	LOC108635079	Novel_lncRNA	108638412	LOC108638412	0.959082	3.13e-06
TCONS_00105053	108634775	LOC108634775	Novel_lncRNA	102181635	FHIT	0.959094	3.12e-06
TCONS_00098561	XLOC_062381	XLOC_062381	Novel_lncRNA	102168616	CCSER1	0.959107	3.12e-06
TCONS_00048653	102180678	MAP4K3	Novel_lncRNA	102190740	GTDC1	0.959139	3.11e-06
TCONS_00071133	102173960	DNAJA2	Novel_lncRNA	108636938	TRNAC-GCA	0.959155	3.1e-06
TCONS_00104890	108634747	LOC108634747	Novel_lncRNA	102182011	LOC102182011	0.959165	3.1e-06
TCONS_00014574	XLOC_009163	XLOC_009163	Novel_lncRNA	XLOC_028036	XLOC_028036	0.95917	3.1e-06
TCONS_00025728	102176770	PPP3CA	Novel_lncRNA	XLOC_062680	XLOC_062680	0.959175	3.1e-06
TCONS_00004634	102173974	DNAJC13	Novel_lncRNA	108637248	LOC108637248	0.959177	3.1e-06
TCONS_00105053	108634775	LOC108634775	Novel_lncRNA	108636534	LOC108636534	0.95918	3.1e-06
TCONS_00038362	102191138	PDSS2	Novel_lncRNA	102191614	GRIN3A	0.959183	3.09e-06
TCONS_00010364	102178786	PPCS	Novel_lncRNA	102172461	ZNF623	0.959186	3.09e-06
TCONS_00107093	XLOC_068035	XLOC_068035	Novel_lncRNA	102168649	NBN	0.959188	3.09e-06
TCONS_00021890	102177417	LRP6	Novel_lncRNA	102191622	CAMKMT	0.959199	3.09e-06
TCONS_00062165	102189776	PLEKHA7	Novel_lncRNA	XLOC_060621	XLOC_060621	0.959241	3.08e-06
TCONS_00055359	102185932	ABHD12	Novel_lncRNA	1485866	ND5	0.959268	3.07e-06
TCONS_00105068	108634775	LOC108634775	Novel_lncRNA	102174689	CA10	0.95927	3.07e-06
TCONS_00035964	102169005	SH3RF1	Novel_lncRNA	102185335	UMAD1	0.959274	3.06e-06
TCONS_00107456	XLOC_068302	XLOC_068302	Novel_lncRNA	XLOC_025775	XLOC_025775	0.959284	3.06e-06
XR_001917334.1	106503653	LOC106503653	Annotated_lncRNA	102185335	UMAD1	0.959291	3.06e-06
TCONS_00062165	102189776	PLEKHA7	Novel_lncRNA	102181635	FHIT	0.959292	3.06e-06
TCONS_00046774	XLOC_030088	XLOC_030088	Novel_lncRNA	102190528	TDRD3	0.959297	3.06e-06
TCONS_00009736	XLOC_006211	XLOC_006211	Novel_lncRNA	102189948	LOC102189948	0.959299	3.06e-06
TCONS_00107456	XLOC_068302	XLOC_068302	Novel_lncRNA	108634087	LOC108634087	0.959307	3.05e-06
TCONS_00025728	102176770	PPP3CA	Novel_lncRNA	XLOC_009157	XLOC_009157	0.959313	3.05e-06
TCONS_00107085	XLOC_068035	XLOC_068035	Novel_lncRNA	102185335	UMAD1	0.959314	3.05e-06
TCONS_00028890	102184717	EFNA5	Novel_lncRNA	102185335	UMAD1	0.959314	3.05e-06
TCONS_00101113	102189748	TBL1X	Novel_lncRNA	102185335	UMAD1	0.959314	3.05e-06
TCONS_00107086	XLOC_068035	XLOC_068035	Novel_lncRNA	102185335	UMAD1	0.959314	3.05e-06
TCONS_00107135	108635404	LOC108635404	Novel_lncRNA	102185335	UMAD1	0.959314	3.05e-06
TCONS_00107141	108635404	LOC108635404	Novel_lncRNA	102185335	UMAD1	0.959314	3.05e-06
TCONS_00059256	102187511	CELF1	Novel_lncRNA	102185335	UMAD1	0.959314	3.05e-06
TCONS_00062540	102174049	ZC3H12C	Novel_lncRNA	102185335	UMAD1	0.959314	3.05e-06
TCONS_00062935	102183894	PRELP	Novel_lncRNA	102185335	UMAD1	0.959314	3.05e-06
TCONS_00106358	XLOC_067486	XLOC_067486	Novel_lncRNA	102185335	UMAD1	0.959314	3.05e-06
TCONS_00010589	102174897	LOC102174897	Novel_lncRNA	102185335	UMAD1	0.959314	3.05e-06
TCONS_00078993	102174160	RNF180	Novel_lncRNA	102185335	UMAD1	0.959314	3.05e-06
TCONS_00078182	102169909	ARL15	Novel_lncRNA	102185335	UMAD1	0.959314	3.05e-06
TCONS_00079344	102171102	NIPBL	Novel_lncRNA	102185335	UMAD1	0.959314	3.05e-06
TCONS_00075436	XLOC_048175	XLOC_048175	Novel_lncRNA	102185335	UMAD1	0.959314	3.05e-06
TCONS_00034293	102186591	BNC2	Novel_lncRNA	102185335	UMAD1	0.959314	3.05e-06
TCONS_00036852	102183872	SHB	Novel_lncRNA	102185335	UMAD1	0.959314	3.05e-06
TCONS_00040550	102190605	CNKSR3	Novel_lncRNA	102185335	UMAD1	0.959314	3.05e-06
TCONS_00021876	102168517	DUSP16	Novel_lncRNA	102185335	UMAD1	0.959314	3.05e-06
TCONS_00017375	102185804	GNAI1	Novel_lncRNA	108635303	LOC108635303	0.959315	3.05e-06
TCONS_00063500	102187614	PLD5	Novel_lncRNA	XLOC_044062	XLOC_044062	0.959323	3.05e-06
TCONS_00051588	102191627	PCCA	Novel_lncRNA	102172665	CWC27	0.959329	3.05e-06
TCONS_00105068	108634775	LOC108634775	Novel_lncRNA	102184378	MCF2L2	0.95933	3.05e-06
TCONS_00083987	102172491	LANCL2	Novel_lncRNA	XLOC_004381	XLOC_004381	0.959335	3.04e-06
TCONS_00004691	102176274	ATP2C1	Novel_lncRNA	108635301	LOC108635301	0.959336	3.04e-06
TCONS_00104374	108634655	LOC108634655	Novel_lncRNA	XLOC_017040	XLOC_017040	0.959348	3.04e-06
TCONS_00004691	102176274	ATP2C1	Novel_lncRNA	102181263	HDAC9	0.959355	3.04e-06
TCONS_00036044	108636534	LOC108636534	Novel_lncRNA	102186604	CFAP77	0.959358	3.04e-06
TCONS_00035964	102169005	SH3RF1	Novel_lncRNA	102168649	NBN	0.959361	3.04e-06
TCONS_00025728	102176770	PPP3CA	Novel_lncRNA	102181635	FHIT	0.959363	3.03e-06
TCONS_00027506	100861211	BMPR1B	Novel_lncRNA	XLOC_017040	XLOC_017040	0.959367	3.03e-06
TCONS_00079345	102171102	NIPBL	Novel_lncRNA	102184378	MCF2L2	0.959371	3.03e-06
TCONS_00100203	102185993	ATP7A	Novel_lncRNA	XLOC_061297	XLOC_061297	0.959375	3.03e-06
TCONS_00049912	102181507	STRBP	Novel_lncRNA	106503826	LOC106503826	0.959381	3.03e-06
TCONS_00014574	XLOC_009163	XLOC_009163	Novel_lncRNA	XLOC_017040	XLOC_017040	0.959381	3.03e-06
TCONS_00035962	102169005	SH3RF1	Novel_lncRNA	102174689	CA10	0.959397	3.02e-06
TCONS_00048653	102180678	MAP4K3	Novel_lncRNA	108634770	LOC108634770	0.959398	3.02e-06
TCONS_00000861	102188353	HSPBAP1	Novel_lncRNA	XLOC_060963	XLOC_060963	0.959405	3.02e-06
TCONS_00106490	XLOC_067571	XLOC_067571	Novel_lncRNA	100860784	CSN2	0.959409	3.02e-06
TCONS_00035964	102169005	SH3RF1	Novel_lncRNA	102186177	RNLS	0.959433	3.01e-06
TCONS_00049912	102181507	STRBP	Novel_lncRNA	102168890	ARID2	0.959438	3.01e-06
TCONS_00004634	102173974	DNAJC13	Novel_lncRNA	102177172	TMEM255B	0.959439	3.01e-06
TCONS_00104374	108634655	LOC108634655	Novel_lncRNA	102181443	INO80D	0.959477	3e-06
TCONS_00106268	108635079	LOC108635079	Novel_lncRNA	102182011	LOC102182011	0.959483	2.99e-06
TCONS_00101125	108634335	SHROOM2	Novel_lncRNA	102168649	NBN	0.95949	2.99e-06
TCONS_00035964	102169005	SH3RF1	Novel_lncRNA	102189074	ISL2	0.959513	2.99e-06
TCONS_00062816	102169778	DCUN1D5	Novel_lncRNA	106502021	MAGI2	0.959544	2.98e-06
TCONS_00056769	102190335	SPAG1	Novel_lncRNA	102178628	MNAT1	0.959547	2.97e-06
TCONS_00051432	XLOC_032990	XLOC_032990	Novel_lncRNA	XLOC_054487	XLOC_054487	0.959555	2.97e-06
TCONS_00107129	108635404	LOC108635404	Novel_lncRNA	102182011	LOC102182011	0.959574	2.97e-06
TCONS_00051588	102191627	PCCA	Novel_lncRNA	102191622	CAMKMT	0.959588	2.96e-06
TCONS_00062816	102169778	DCUN1D5	Novel_lncRNA	XLOC_060054	XLOC_060054	0.95959	2.96e-06
TCONS_00049912	102181507	STRBP	Novel_lncRNA	108635079	LOC108635079	0.959604	2.96e-06
TCONS_00051432	XLOC_032990	XLOC_032990	Novel_lncRNA	XLOC_025775	XLOC_025775	0.959611	2.95e-06
TCONS_00001068	102189992	P3H2	Novel_lncRNA	108634770	LOC108634770	0.959618	2.95e-06
TCONS_00079345	102171102	NIPBL	Novel_lncRNA	XLOC_025775	XLOC_025775	0.959629	2.95e-06
TCONS_00051432	XLOC_032990	XLOC_032990	Novel_lncRNA	102175089	CUTC	0.959636	2.95e-06
TCONS_00063500	102187614	PLD5	Novel_lncRNA	102178628	MNAT1	0.959636	2.95e-06
TCONS_00035962	102169005	SH3RF1	Novel_lncRNA	102190528	TDRD3	0.959649	2.94e-06
TCONS_00079345	102171102	NIPBL	Novel_lncRNA	102169186	LOC102169186	0.959651	2.94e-06
TCONS_00078666	102182831	CCDC127	Novel_lncRNA	102169752	SRFBP1	0.959652	2.94e-06
TCONS_00104357	108634655	LOC108634655	Novel_lncRNA	102186177	RNLS	0.959657	2.94e-06
TCONS_00028876	102181389	FBXL17	Novel_lncRNA	102186177	RNLS	0.959676	2.93e-06
TCONS_00035964	102169005	SH3RF1	Novel_lncRNA	1485867	ND6	0.959676	2.93e-06
TCONS_00048653	102180678	MAP4K3	Novel_lncRNA	102185335	UMAD1	0.959682	2.93e-06
TCONS_00045035	102175214	NEO1	Novel_lncRNA	XLOC_060621	XLOC_060621	0.959685	2.93e-06
TCONS_00007312	102186529	FAM171B	Novel_lncRNA	102190740	GTDC1	0.959693	2.93e-06
XR_001917334.1	106503653	LOC106503653	Annotated_lncRNA	1485866	ND5	0.959697	2.93e-06
TCONS_00107093	XLOC_068035	XLOC_068035	Novel_lncRNA	1485867	ND6	0.9597	2.92e-06
TCONS_00104890	108634747	LOC108634747	Novel_lncRNA	108635081	LOC108635081	0.959712	2.92e-06
TCONS_00063391	102169401	AHCTF1	Novel_lncRNA	102186177	RNLS	0.959721	2.92e-06
TCONS_00006790	XLOC_004475	XLOC_004475	Novel_lncRNA	1485867	ND6	0.959722	2.92e-06
TCONS_00028876	102181389	FBXL17	Novel_lncRNA	102170740	CMTM8	0.959722	2.92e-06
TCONS_00009331	102188539	ITGB6	Novel_lncRNA	102172665	CWC27	0.959724	2.92e-06
TCONS_00104874	108634747	LOC108634747	Novel_lncRNA	100861211	BMPR1B	0.959725	2.92e-06
TCONS_00014574	XLOC_009163	XLOC_009163	Novel_lncRNA	XLOC_060963	XLOC_060963	0.959728	2.92e-06
TCONS_00057890	102168649	NBN	Novel_lncRNA	102188466	WASL	0.959731	2.91e-06
TCONS_00006446	102182546	C2H2orf76	Novel_lncRNA	102172665	CWC27	0.959741	2.91e-06
TCONS_00107129	108635404	LOC108635404	Novel_lncRNA	XLOC_060054	XLOC_060054	0.959743	2.91e-06
TCONS_00100202	102185993	ATP7A	Novel_lncRNA	102186177	RNLS	0.95977	2.9e-06
TCONS_00083103	102178670	MAGI1	Novel_lncRNA	XLOC_060621	XLOC_060621	0.959773	2.9e-06
TCONS_00083103	102178670	MAGI1	Novel_lncRNA	1485866	ND5	0.959779	2.9e-06
TCONS_00046774	XLOC_030088	XLOC_030088	Novel_lncRNA	102171067	GDA	0.959791	2.9e-06
TCONS_00071133	102173960	DNAJA2	Novel_lncRNA	XLOC_019581	XLOC_019581	0.95982	2.89e-06
TCONS_00105665	XLOC_066994	XLOC_066994	Novel_lncRNA	102186456	VWDE	0.959822	2.89e-06
TCONS_00049912	102181507	STRBP	Novel_lncRNA	102181060	LOC102181060	0.959825	2.88e-06
TCONS_00107074	XLOC_068033	XLOC_068033	Novel_lncRNA	102176235	MSRA	0.959825	2.88e-06
TCONS_00028876	102181389	FBXL17	Novel_lncRNA	102186456	VWDE	0.959826	2.88e-06
TCONS_00025728	102176770	PPP3CA	Novel_lncRNA	102187210	CPT1B	0.959833	2.88e-06
TCONS_00100202	102185993	ATP7A	Novel_lncRNA	102178786	PPCS	0.95985	2.88e-06
TCONS_00021890	102177417	LRP6	Novel_lncRNA	102174689	CA10	0.959852	2.88e-06
TCONS_00105665	XLOC_066994	XLOC_066994	Novel_lncRNA	102180222	DOCK5	0.95986	2.87e-06
TCONS_00001068	102189992	P3H2	Novel_lncRNA	102177553	ANAPC10	0.959883	2.87e-06
TCONS_00056769	102190335	SPAG1	Novel_lncRNA	102191614	GRIN3A	0.959887	2.86e-06
TCONS_00101125	108634335	SHROOM2	Novel_lncRNA	102171067	GDA	0.959897	2.86e-06
TCONS_00071133	102173960	DNAJA2	Novel_lncRNA	102175089	CUTC	0.959911	2.86e-06
TCONS_00107136	108635404	LOC108635404	Novel_lncRNA	102172461	ZNF623	0.959934	2.85e-06
TCONS_00035962	102169005	SH3RF1	Novel_lncRNA	102188466	WASL	0.959936	2.85e-06
TCONS_00014574	XLOC_009163	XLOC_009163	Novel_lncRNA	102191622	CAMKMT	0.959943	2.85e-06
TCONS_00107093	XLOC_068035	XLOC_068035	Novel_lncRNA	108636534	LOC108636534	0.959953	2.84e-06
TCONS_00026726	XLOC_017040	XLOC_017040	Novel_lncRNA	108634233	LOC108634233	0.959954	2.84e-06
TCONS_00000861	102188353	HSPBAP1	Novel_lncRNA	106502527	LOC106502527	0.959962	2.84e-06
TCONS_00107085	XLOC_068035	XLOC_068035	Novel_lncRNA	102186177	RNLS	0.959963	2.84e-06
TCONS_00028890	102184717	EFNA5	Novel_lncRNA	102186177	RNLS	0.959963	2.84e-06
TCONS_00101113	102189748	TBL1X	Novel_lncRNA	102186177	RNLS	0.959963	2.84e-06
TCONS_00107086	XLOC_068035	XLOC_068035	Novel_lncRNA	102186177	RNLS	0.959963	2.84e-06
TCONS_00107135	108635404	LOC108635404	Novel_lncRNA	102186177	RNLS	0.959963	2.84e-06
TCONS_00107141	108635404	LOC108635404	Novel_lncRNA	102186177	RNLS	0.959963	2.84e-06
TCONS_00059256	102187511	CELF1	Novel_lncRNA	102186177	RNLS	0.959963	2.84e-06
TCONS_00062540	102174049	ZC3H12C	Novel_lncRNA	102186177	RNLS	0.959963	2.84e-06
TCONS_00062935	102183894	PRELP	Novel_lncRNA	102186177	RNLS	0.959963	2.84e-06
TCONS_00106358	XLOC_067486	XLOC_067486	Novel_lncRNA	102186177	RNLS	0.959963	2.84e-06
TCONS_00010589	102174897	LOC102174897	Novel_lncRNA	102186177	RNLS	0.959963	2.84e-06
TCONS_00078993	102174160	RNF180	Novel_lncRNA	102186177	RNLS	0.959963	2.84e-06
TCONS_00078182	102169909	ARL15	Novel_lncRNA	102186177	RNLS	0.959963	2.84e-06
TCONS_00079344	102171102	NIPBL	Novel_lncRNA	102186177	RNLS	0.959963	2.84e-06
TCONS_00075436	XLOC_048175	XLOC_048175	Novel_lncRNA	102186177	RNLS	0.959963	2.84e-06
TCONS_00034293	102186591	BNC2	Novel_lncRNA	102186177	RNLS	0.959963	2.84e-06
TCONS_00036852	102183872	SHB	Novel_lncRNA	102186177	RNLS	0.959963	2.84e-06
TCONS_00040550	102190605	CNKSR3	Novel_lncRNA	102186177	RNLS	0.959963	2.84e-06
TCONS_00021876	102168517	DUSP16	Novel_lncRNA	102186177	RNLS	0.959963	2.84e-06
TCONS_00009736	XLOC_006211	XLOC_006211	Novel_lncRNA	102190528	TDRD3	0.959967	2.84e-06
TCONS_00062851	102168651	PDGFD	Novel_lncRNA	102183387	LOC102183387	0.959971	2.84e-06
TCONS_00035962	102169005	SH3RF1	Novel_lncRNA	102171067	GDA	0.959972	2.84e-06
TCONS_00079345	102171102	NIPBL	Novel_lncRNA	102190431	SGK2	0.959974	2.84e-06
TCONS_00083440	102182642	NT5DC2	Novel_lncRNA	108636534	LOC108636534	0.959981	2.83e-06
TCONS_00062851	102168651	PDGFD	Novel_lncRNA	XLOC_025775	XLOC_025775	0.959988	2.83e-06
TCONS_00107074	XLOC_068033	XLOC_068033	Novel_lncRNA	108637766	LOC108637766	0.95999	2.83e-06
TCONS_00100203	102185993	ATP7A	Novel_lncRNA	102171194	TTC23	0.959993	2.83e-06
TCONS_00010364	102178786	PPCS	Novel_lncRNA	108638412	LOC108638412	0.959993	2.83e-06
TCONS_00009331	102188539	ITGB6	Novel_lncRNA	1485866	ND5	0.960011	2.83e-06
TCONS_00001068	102189992	P3H2	Novel_lncRNA	XLOC_028036	XLOC_028036	0.960022	2.82e-06
TCONS_00098561	XLOC_062381	XLOC_062381	Novel_lncRNA	XLOC_019242	XLOC_019242	0.960026	2.82e-06
TCONS_00101125	108634335	SHROOM2	Novel_lncRNA	108635081	LOC108635081	0.960029	2.82e-06
TCONS_00026726	XLOC_017040	XLOC_017040	Novel_lncRNA	1485867	ND6	0.960035	2.82e-06
TCONS_00049912	102181507	STRBP	Novel_lncRNA	XLOC_004381	XLOC_004381	0.960042	2.82e-06
TCONS_00101125	108634335	SHROOM2	Novel_lncRNA	108634770	LOC108634770	0.960053	2.81e-06
TCONS_00027506	100861211	BMPR1B	Novel_lncRNA	102191614	GRIN3A	0.960054	2.81e-06
TCONS_00002588	XLOC_001767	XLOC_001767	Novel_lncRNA	102191614	GRIN3A	0.96006	2.81e-06
TCONS_00100203	102185993	ATP7A	Novel_lncRNA	102182306	RFX3	0.960064	2.81e-06
TCONS_00063500	102187614	PLD5	Novel_lncRNA	XLOC_019242	XLOC_019242	0.960072	2.81e-06
TCONS_00051432	XLOC_032990	XLOC_032990	Novel_lncRNA	102171067	GDA	0.960075	2.81e-06
TCONS_00107093	XLOC_068035	XLOC_068035	Novel_lncRNA	102170740	CMTM8	0.960075	2.81e-06
TCONS_00062851	102168651	PDGFD	Novel_lncRNA	102191614	GRIN3A	0.960076	2.81e-06
TCONS_00007312	102186529	FAM171B	Novel_lncRNA	102174689	CA10	0.960079	2.8e-06
TCONS_00062816	102169778	DCUN1D5	Novel_lncRNA	XLOC_060963	XLOC_060963	0.960087	2.8e-06
TCONS_00105078	108634775	LOC108634775	Novel_lncRNA	XLOC_060963	XLOC_060963	0.960099	2.8e-06
TCONS_00026726	XLOC_017040	XLOC_017040	Novel_lncRNA	108634775	LOC108634775	0.960099	2.8e-06
TCONS_00046774	XLOC_030088	XLOC_030088	Novel_lncRNA	106502527	LOC106502527	0.960105	2.8e-06
TCONS_00047284	102174942	PUM2	Novel_lncRNA	102190528	TDRD3	0.960106	2.8e-06
TCONS_00100203	102185993	ATP7A	Novel_lncRNA	102181821	LOC102181821	0.960109	2.79e-06
TCONS_00083103	102178670	MAGI1	Novel_lncRNA	102190095	SDK1	0.960109	2.79e-06
TCONS_00104890	108634747	LOC108634747	Novel_lncRNA	XLOC_060054	XLOC_060054	0.960113	2.79e-06
TCONS_00093961	102190578	GRK5	Novel_lncRNA	102181443	INO80D	0.960114	2.79e-06
TCONS_00047284	102174942	PUM2	Novel_lncRNA	102191716	ERICH5	0.960115	2.79e-06
TCONS_00107089	XLOC_068035	XLOC_068035	Novel_lncRNA	102186177	RNLS	0.960117	2.79e-06
TCONS_00006790	XLOC_004475	XLOC_004475	Novel_lncRNA	102175089	CUTC	0.960119	2.79e-06
TCONS_00051058	106502327	LOC106502327	Novel_lncRNA	1485866	ND5	0.960128	2.79e-06
TCONS_00062851	102168651	PDGFD	Novel_lncRNA	102183948	STAP1	0.960135	2.79e-06
TCONS_00107074	XLOC_068033	XLOC_068033	Novel_lncRNA	102171194	TTC23	0.96014	2.79e-06
TCONS_00006790	XLOC_004475	XLOC_004475	Novel_lncRNA	102186177	RNLS	0.960158	2.78e-06
TCONS_00028876	102181389	FBXL17	Novel_lncRNA	XLOC_060621	XLOC_060621	0.960161	2.78e-06
TCONS_00004634	102173974	DNAJC13	Novel_lncRNA	102182635	CATSPERB	0.960166	2.78e-06
TCONS_00046774	XLOC_030088	XLOC_030088	Novel_lncRNA	108636534	LOC108636534	0.960182	2.77e-06
TCONS_00062851	102168651	PDGFD	Novel_lncRNA	108636916	LOC108636916	0.960185	2.77e-06
TCONS_00062816	102169778	DCUN1D5	Novel_lncRNA	102181821	LOC102181821	0.960215	2.76e-06
TCONS_00062851	102168651	PDGFD	Novel_lncRNA	108636938	TRNAC-GCA	0.960217	2.76e-06
TCONS_00016399	102189827	CNOT4	Novel_lncRNA	XLOC_013787	XLOC_013787	0.960222	2.76e-06
TCONS_00100203	102185993	ATP7A	Novel_lncRNA	102187210	CPT1B	0.960233	2.76e-06
TCONS_00107089	XLOC_068035	XLOC_068035	Novel_lncRNA	1485867	ND6	0.960242	2.75e-06
TCONS_00045522	102183148	MCC	Novel_lncRNA	XLOC_060621	XLOC_060621	0.960242	2.75e-06
TCONS_00105602	108634845	LOC108634845	Novel_lncRNA	102179748	OPHN1	0.96026	2.75e-06
TCONS_00049912	102181507	STRBP	Novel_lncRNA	XLOC_029998	XLOC_029998	0.960265	2.75e-06
TCONS_00107089	XLOC_068035	XLOC_068035	Novel_lncRNA	102185335	UMAD1	0.960277	2.74e-06
TCONS_00009331	102188539	ITGB6	Novel_lncRNA	XLOC_060621	XLOC_060621	0.96028	2.74e-06
TCONS_00049912	102181507	STRBP	Novel_lncRNA	XLOC_044062	XLOC_044062	0.960281	2.74e-06
TCONS_00104357	108634655	LOC108634655	Novel_lncRNA	1485867	ND6	0.960291	2.74e-06
TCONS_00049912	102181507	STRBP	Novel_lncRNA	XLOC_001766	XLOC_001766	0.960293	2.74e-06
TCONS_00100203	102185993	ATP7A	Novel_lncRNA	102190888	MACROD2	0.960295	2.74e-06
TCONS_00105602	108634845	LOC108634845	Novel_lncRNA	108634333	LOC108634333	0.960298	2.74e-06
TCONS_00035962	102169005	SH3RF1	Novel_lncRNA	102189948	LOC102189948	0.960307	2.73e-06
TCONS_00006790	XLOC_004475	XLOC_004475	Novel_lncRNA	XLOC_028036	XLOC_028036	0.960312	2.73e-06
TCONS_00014574	XLOC_009163	XLOC_009163	Novel_lncRNA	102168890	ARID2	0.960313	2.73e-06
TCONS_00083987	102172491	LANCL2	Novel_lncRNA	102188466	WASL	0.960314	2.73e-06
TCONS_00004634	102173974	DNAJC13	Novel_lncRNA	102190528	TDRD3	0.96032	2.73e-06
TCONS_00025728	102176770	PPP3CA	Novel_lncRNA	102171417	LOC102171417	0.96032	2.73e-06
TCONS_00107085	XLOC_068035	XLOC_068035	Novel_lncRNA	1485867	ND6	0.960323	2.73e-06
TCONS_00028890	102184717	EFNA5	Novel_lncRNA	1485867	ND6	0.960323	2.73e-06
TCONS_00101113	102189748	TBL1X	Novel_lncRNA	1485867	ND6	0.960323	2.73e-06
TCONS_00107086	XLOC_068035	XLOC_068035	Novel_lncRNA	1485867	ND6	0.960323	2.73e-06
TCONS_00107135	108635404	LOC108635404	Novel_lncRNA	1485867	ND6	0.960323	2.73e-06
TCONS_00107141	108635404	LOC108635404	Novel_lncRNA	1485867	ND6	0.960323	2.73e-06
TCONS_00059256	102187511	CELF1	Novel_lncRNA	1485867	ND6	0.960323	2.73e-06
TCONS_00062540	102174049	ZC3H12C	Novel_lncRNA	1485867	ND6	0.960323	2.73e-06
TCONS_00062935	102183894	PRELP	Novel_lncRNA	1485867	ND6	0.960323	2.73e-06
TCONS_00106358	XLOC_067486	XLOC_067486	Novel_lncRNA	1485867	ND6	0.960323	2.73e-06
TCONS_00010589	102174897	LOC102174897	Novel_lncRNA	1485867	ND6	0.960323	2.73e-06
TCONS_00078993	102174160	RNF180	Novel_lncRNA	1485867	ND6	0.960323	2.73e-06
TCONS_00078182	102169909	ARL15	Novel_lncRNA	1485867	ND6	0.960323	2.73e-06
TCONS_00079344	102171102	NIPBL	Novel_lncRNA	1485867	ND6	0.960323	2.73e-06
TCONS_00075436	XLOC_048175	XLOC_048175	Novel_lncRNA	1485867	ND6	0.960323	2.73e-06
TCONS_00034293	102186591	BNC2	Novel_lncRNA	1485867	ND6	0.960323	2.73e-06
TCONS_00036852	102183872	SHB	Novel_lncRNA	1485867	ND6	0.960323	2.73e-06
TCONS_00040550	102190605	CNKSR3	Novel_lncRNA	1485867	ND6	0.960323	2.73e-06
TCONS_00021876	102168517	DUSP16	Novel_lncRNA	1485867	ND6	0.960323	2.73e-06
TCONS_00107136	108635404	LOC108635404	Novel_lncRNA	102187134	ZCCHC7	0.960332	2.73e-06
TCONS_00079345	102171102	NIPBL	Novel_lncRNA	102182011	LOC102182011	0.960334	2.73e-06
TCONS_00093961	102190578	GRK5	Novel_lncRNA	102171040	LOC102171040	0.960358	2.72e-06
TCONS_00035962	102169005	SH3RF1	Novel_lncRNA	XLOC_017040	XLOC_017040	0.960363	2.72e-06
TCONS_00098561	XLOC_062381	XLOC_062381	Novel_lncRNA	102182011	LOC102182011	0.960367	2.72e-06
TCONS_00025728	102176770	PPP3CA	Novel_lncRNA	XLOC_014735	XLOC_014735	0.960369	2.71e-06
TCONS_00098561	XLOC_062381	XLOC_062381	Novel_lncRNA	108634747	LOC108634747	0.960377	2.71e-06
TCONS_00107089	XLOC_068035	XLOC_068035	Novel_lncRNA	XLOC_028036	XLOC_028036	0.960381	2.71e-06
TCONS_00107093	XLOC_068035	XLOC_068035	Novel_lncRNA	XLOC_028036	XLOC_028036	0.960389	2.71e-06
XR_001917334.1	106503653	LOC106503653	Annotated_lncRNA	102186094	DEPDC4	0.960406	2.7e-06
TCONS_00083440	102182642	NT5DC2	Novel_lncRNA	102178302	CFAP52	0.960407	2.7e-06
TCONS_00104874	108634747	LOC108634747	Novel_lncRNA	102172665	CWC27	0.960411	2.7e-06
TCONS_00101125	108634335	SHROOM2	Novel_lncRNA	102183148	MCC	0.960412	2.7e-06
TCONS_00004634	102173974	DNAJC13	Novel_lncRNA	108637766	LOC108637766	0.960418	2.7e-06
TCONS_00026726	XLOC_017040	XLOC_017040	Novel_lncRNA	102183948	STAP1	0.960422	2.7e-06
TCONS_00035964	102169005	SH3RF1	Novel_lncRNA	108636534	LOC108636534	0.960444	2.69e-06
TCONS_00063391	102169401	AHCTF1	Novel_lncRNA	XLOC_028036	XLOC_028036	0.960448	2.69e-06
TCONS_00107129	108635404	LOC108635404	Novel_lncRNA	102185335	UMAD1	0.960455	2.69e-06
TCONS_00083277	102182265	C22H3orf67	Novel_lncRNA	102181443	INO80D	0.960465	2.69e-06
TCONS_00107129	108635404	LOC108635404	Novel_lncRNA	108635081	LOC108635081	0.96047	2.68e-06
TCONS_00100203	102185993	ATP7A	Novel_lncRNA	102186604	CFAP77	0.960475	2.68e-06
TCONS_00098561	XLOC_062381	XLOC_062381	Novel_lncRNA	102178628	MNAT1	0.960483	2.68e-06
TCONS_00100203	102185993	ATP7A	Novel_lncRNA	108634333	LOC108634333	0.960484	2.68e-06
TCONS_00028777	106501794	MAEA	Novel_lncRNA	102189209	LOC102189209	0.960493	2.68e-06
TCONS_00105078	108634775	LOC108634775	Novel_lncRNA	102183148	MCC	0.960507	2.67e-06
TCONS_00006790	XLOC_004475	XLOC_004475	Novel_lncRNA	102185335	UMAD1	0.960528	2.67e-06
TCONS_00016399	102189827	CNOT4	Novel_lncRNA	102179335	ITIH1	0.960529	2.67e-06
TCONS_00079345	102171102	NIPBL	Novel_lncRNA	102168514	LOC102168514	0.960542	2.66e-06
TCONS_00036044	108636534	LOC108636534	Novel_lncRNA	108636916	LOC108636916	0.960553	2.66e-06
TCONS_00083277	102182265	C22H3orf67	Novel_lncRNA	102175089	CUTC	0.960564	2.66e-06
TCONS_00007312	102186529	FAM171B	Novel_lncRNA	108634845	LOC108634845	0.960565	2.66e-06
TCONS_00104357	108634655	LOC108634655	Novel_lncRNA	102168649	NBN	0.960573	2.65e-06
TCONS_00062165	102189776	PLEKHA7	Novel_lncRNA	XLOC_019581	XLOC_019581	0.960576	2.65e-06
TCONS_00107093	XLOC_068035	XLOC_068035	Novel_lncRNA	102183387	LOC102183387	0.960579	2.65e-06
TCONS_00107074	XLOC_068033	XLOC_068033	Novel_lncRNA	102174689	CA10	0.960579	2.65e-06
TCONS_00001068	102189992	P3H2	Novel_lncRNA	102186604	CFAP77	0.960584	2.65e-06
TCONS_00107136	108635404	LOC108635404	Novel_lncRNA	102190095	SDK1	0.960589	2.65e-06
TCONS_00083277	102182265	C22H3orf67	Novel_lncRNA	102170234	LOC102170234	0.960602	2.64e-06
TCONS_00079345	102171102	NIPBL	Novel_lncRNA	102188148	PLCB1	0.960611	2.64e-06
TCONS_00025728	102176770	PPP3CA	Novel_lncRNA	XLOC_000557	XLOC_000557	0.960611	2.64e-06
TCONS_00105602	108634845	LOC108634845	Novel_lncRNA	XLOC_060054	XLOC_060054	0.960614	2.64e-06
TCONS_00104374	108634655	LOC108634655	Novel_lncRNA	108636534	LOC108636534	0.960623	2.64e-06
TCONS_00107089	XLOC_068035	XLOC_068035	Novel_lncRNA	102170740	CMTM8	0.96063	2.64e-06
TCONS_00104890	108634747	LOC108634747	Novel_lncRNA	102185335	UMAD1	0.960634	2.64e-06
TCONS_00101125	108634335	SHROOM2	Novel_lncRNA	108635964	TRNAC-GCA	0.960638	2.63e-06
TCONS_00097124	102188740	VCL	Novel_lncRNA	102169752	SRFBP1	0.960639	2.63e-06
TCONS_00104357	108634655	LOC108634655	Novel_lncRNA	XLOC_028036	XLOC_028036	0.960644	2.63e-06
TCONS_00107136	108635404	LOC108635404	Novel_lncRNA	108634333	LOC108634333	0.960646	2.63e-06
TCONS_00051058	106502327	LOC106502327	Novel_lncRNA	XLOC_019581	XLOC_019581	0.960653	2.63e-06
TCONS_00002588	XLOC_001767	XLOC_001767	Novel_lncRNA	102178628	MNAT1	0.960661	2.63e-06
TCONS_00107034	XLOC_067998	XLOC_067998	Novel_lncRNA	XLOC_038940	XLOC_038940	0.960669	2.62e-06
TCONS_00105068	108634775	LOC108634775	Novel_lncRNA	XLOC_011953	XLOC_011953	0.96069	2.62e-06
TCONS_00100203	102185993	ATP7A	Novel_lncRNA	XLOC_000557	XLOC_000557	0.960696	2.62e-06
TCONS_00000861	102188353	HSPBAP1	Novel_lncRNA	102190431	SGK2	0.960697	2.62e-06
TCONS_00002588	XLOC_001767	XLOC_001767	Novel_lncRNA	102175089	CUTC	0.960718	2.61e-06
TCONS_00025728	102176770	PPP3CA	Novel_lncRNA	102191138	PDSS2	0.960724	2.61e-06
TCONS_00100381	102179748	OPHN1	Novel_lncRNA	102191614	GRIN3A	0.960727	2.61e-06
TCONS_00104357	108634655	LOC108634655	Novel_lncRNA	102170740	CMTM8	0.96074	2.6e-06
TCONS_00100203	102185993	ATP7A	Novel_lncRNA	102179070	CAPS2	0.960747	2.6e-06
TCONS_00105053	108634775	LOC108634775	Novel_lncRNA	XLOC_046524	XLOC_046524	0.96075	2.6e-06
TCONS_00107085	XLOC_068035	XLOC_068035	Novel_lncRNA	102168649	NBN	0.960751	2.6e-06
TCONS_00107086	XLOC_068035	XLOC_068035	Novel_lncRNA	102168649	NBN	0.960751	2.6e-06
TCONS_00107135	108635404	LOC108635404	Novel_lncRNA	102168649	NBN	0.960751	2.6e-06
TCONS_00062540	102174049	ZC3H12C	Novel_lncRNA	102168649	NBN	0.960751	2.6e-06
TCONS_00078182	102169909	ARL15	Novel_lncRNA	102168649	NBN	0.960751	2.6e-06
TCONS_00028890	102184717	EFNA5	Novel_lncRNA	102168649	NBN	0.960751	2.6e-06
TCONS_00101113	102189748	TBL1X	Novel_lncRNA	102168649	NBN	0.960751	2.6e-06
TCONS_00107141	108635404	LOC108635404	Novel_lncRNA	102168649	NBN	0.960751	2.6e-06
TCONS_00059256	102187511	CELF1	Novel_lncRNA	102168649	NBN	0.960751	2.6e-06
TCONS_00062935	102183894	PRELP	Novel_lncRNA	102168649	NBN	0.960751	2.6e-06
TCONS_00106358	XLOC_067486	XLOC_067486	Novel_lncRNA	102168649	NBN	0.960751	2.6e-06
TCONS_00010589	102174897	LOC102174897	Novel_lncRNA	102168649	NBN	0.960751	2.6e-06
TCONS_00078993	102174160	RNF180	Novel_lncRNA	102168649	NBN	0.960751	2.6e-06
TCONS_00079344	102171102	NIPBL	Novel_lncRNA	102168649	NBN	0.960751	2.6e-06
TCONS_00075436	XLOC_048175	XLOC_048175	Novel_lncRNA	102168649	NBN	0.960751	2.6e-06
TCONS_00034293	102186591	BNC2	Novel_lncRNA	102168649	NBN	0.960751	2.6e-06
TCONS_00036852	102183872	SHB	Novel_lncRNA	102168649	NBN	0.960751	2.6e-06
TCONS_00040550	102190605	CNKSR3	Novel_lncRNA	102168649	NBN	0.960751	2.6e-06
TCONS_00021876	102168517	DUSP16	Novel_lncRNA	102168649	NBN	0.960751	2.6e-06
TCONS_00107456	XLOC_068302	XLOC_068302	Novel_lncRNA	102191138	PDSS2	0.960762	2.6e-06
TCONS_00104874	108634747	LOC108634747	Novel_lncRNA	XLOC_044062	XLOC_044062	0.960768	2.6e-06
TCONS_00036044	108636534	LOC108636534	Novel_lncRNA	108634747	LOC108634747	0.960775	2.59e-06
TCONS_00009736	XLOC_006211	XLOC_006211	Novel_lncRNA	102181821	LOC102181821	0.960785	2.59e-06
TCONS_00045522	102183148	MCC	Novel_lncRNA	102191622	CAMKMT	0.960806	2.58e-06
TCONS_00004633	102173974	DNAJC13	Novel_lncRNA	102181263	HDAC9	0.960809	2.58e-06
TCONS_00036044	108636534	LOC108636534	Novel_lncRNA	108634746	LOC108634746	0.960815	2.58e-06
TCONS_00098561	XLOC_062381	XLOC_062381	Novel_lncRNA	XLOC_028393	XLOC_028393	0.960817	2.58e-06
TCONS_00107085	XLOC_068035	XLOC_068035	Novel_lncRNA	XLOC_028036	XLOC_028036	0.960817	2.58e-06
TCONS_00028890	102184717	EFNA5	Novel_lncRNA	XLOC_028036	XLOC_028036	0.960817	2.58e-06
TCONS_00101113	102189748	TBL1X	Novel_lncRNA	XLOC_028036	XLOC_028036	0.960817	2.58e-06
TCONS_00107086	XLOC_068035	XLOC_068035	Novel_lncRNA	XLOC_028036	XLOC_028036	0.960817	2.58e-06
TCONS_00107135	108635404	LOC108635404	Novel_lncRNA	XLOC_028036	XLOC_028036	0.960817	2.58e-06
TCONS_00107141	108635404	LOC108635404	Novel_lncRNA	XLOC_028036	XLOC_028036	0.960817	2.58e-06
TCONS_00059256	102187511	CELF1	Novel_lncRNA	XLOC_028036	XLOC_028036	0.960817	2.58e-06
TCONS_00062540	102174049	ZC3H12C	Novel_lncRNA	XLOC_028036	XLOC_028036	0.960817	2.58e-06
TCONS_00062935	102183894	PRELP	Novel_lncRNA	XLOC_028036	XLOC_028036	0.960817	2.58e-06
TCONS_00106358	XLOC_067486	XLOC_067486	Novel_lncRNA	XLOC_028036	XLOC_028036	0.960817	2.58e-06
TCONS_00010589	102174897	LOC102174897	Novel_lncRNA	XLOC_028036	XLOC_028036	0.960817	2.58e-06
TCONS_00078993	102174160	RNF180	Novel_lncRNA	XLOC_028036	XLOC_028036	0.960817	2.58e-06
TCONS_00078182	102169909	ARL15	Novel_lncRNA	XLOC_028036	XLOC_028036	0.960817	2.58e-06
TCONS_00079344	102171102	NIPBL	Novel_lncRNA	XLOC_028036	XLOC_028036	0.960817	2.58e-06
TCONS_00075436	XLOC_048175	XLOC_048175	Novel_lncRNA	XLOC_028036	XLOC_028036	0.960817	2.58e-06
TCONS_00034293	102186591	BNC2	Novel_lncRNA	XLOC_028036	XLOC_028036	0.960817	2.58e-06
TCONS_00036852	102183872	SHB	Novel_lncRNA	XLOC_028036	XLOC_028036	0.960817	2.58e-06
TCONS_00040550	102190605	CNKSR3	Novel_lncRNA	XLOC_028036	XLOC_028036	0.960817	2.58e-06
TCONS_00021876	102168517	DUSP16	Novel_lncRNA	XLOC_028036	XLOC_028036	0.960817	2.58e-06
TCONS_00089728	102168225	MYO5B	Novel_lncRNA	XLOC_060621	XLOC_060621	0.960822	2.58e-06
TCONS_00107085	XLOC_068035	XLOC_068035	Novel_lncRNA	102170740	CMTM8	0.960826	2.58e-06
TCONS_00028890	102184717	EFNA5	Novel_lncRNA	102170740	CMTM8	0.960827	2.58e-06
TCONS_00101113	102189748	TBL1X	Novel_lncRNA	102170740	CMTM8	0.960827	2.58e-06
TCONS_00107086	XLOC_068035	XLOC_068035	Novel_lncRNA	102170740	CMTM8	0.960827	2.58e-06
TCONS_00107135	108635404	LOC108635404	Novel_lncRNA	102170740	CMTM8	0.960827	2.58e-06
TCONS_00107141	108635404	LOC108635404	Novel_lncRNA	102170740	CMTM8	0.960827	2.58e-06
TCONS_00059256	102187511	CELF1	Novel_lncRNA	102170740	CMTM8	0.960827	2.58e-06
TCONS_00062540	102174049	ZC3H12C	Novel_lncRNA	102170740	CMTM8	0.960827	2.58e-06
TCONS_00062935	102183894	PRELP	Novel_lncRNA	102170740	CMTM8	0.960827	2.58e-06
TCONS_00106358	XLOC_067486	XLOC_067486	Novel_lncRNA	102170740	CMTM8	0.960827	2.58e-06
TCONS_00010589	102174897	LOC102174897	Novel_lncRNA	102170740	CMTM8	0.960827	2.58e-06
TCONS_00078993	102174160	RNF180	Novel_lncRNA	102170740	CMTM8	0.960827	2.58e-06
TCONS_00078182	102169909	ARL15	Novel_lncRNA	102170740	CMTM8	0.960827	2.58e-06
TCONS_00079344	102171102	NIPBL	Novel_lncRNA	102170740	CMTM8	0.960827	2.58e-06
TCONS_00075436	XLOC_048175	XLOC_048175	Novel_lncRNA	102170740	CMTM8	0.960827	2.58e-06
TCONS_00034293	102186591	BNC2	Novel_lncRNA	102170740	CMTM8	0.960827	2.58e-06
TCONS_00036852	102183872	SHB	Novel_lncRNA	102170740	CMTM8	0.960827	2.58e-06
TCONS_00040550	102190605	CNKSR3	Novel_lncRNA	102170740	CMTM8	0.960827	2.58e-06
TCONS_00021876	102168517	DUSP16	Novel_lncRNA	102170740	CMTM8	0.960827	2.58e-06
TCONS_00100202	102185993	ATP7A	Novel_lncRNA	102183387	LOC102183387	0.960834	2.58e-06
TCONS_00031267	XLOC_019976	XLOC_019976	Novel_lncRNA	102173013	FBXO11	0.960836	2.58e-06
TCONS_00006790	XLOC_004475	XLOC_004475	Novel_lncRNA	102170740	CMTM8	0.960838	2.57e-06
TCONS_00063500	102187614	PLD5	Novel_lncRNA	102191246	GPHN	0.960845	2.57e-06
TCONS_00071133	102173960	DNAJA2	Novel_lncRNA	102181443	INO80D	0.960846	2.57e-06
TCONS_00004634	102173974	DNAJC13	Novel_lncRNA	XLOC_029998	XLOC_029998	0.960864	2.57e-06
TCONS_00036044	108636534	LOC108636534	Novel_lncRNA	102177553	ANAPC10	0.96087	2.57e-06
TCONS_00049912	102181507	STRBP	Novel_lncRNA	106502021	MAGI2	0.960872	2.57e-06
TCONS_00027506	100861211	BMPR1B	Novel_lncRNA	102169752	SRFBP1	0.960874	2.56e-06
TCONS_00083440	102182642	NT5DC2	Novel_lncRNA	102181635	FHIT	0.960879	2.56e-06
TCONS_00028876	102181389	FBXL17	Novel_lncRNA	102183387	LOC102183387	0.960879	2.56e-06
TCONS_00036044	108636534	LOC108636534	Novel_lncRNA	XLOC_025775	XLOC_025775	0.96088	2.56e-06
TCONS_00083440	102182642	NT5DC2	Novel_lncRNA	102191622	CAMKMT	0.960886	2.56e-06
TCONS_00079345	102171102	NIPBL	Novel_lncRNA	102187134	ZCCHC7	0.960896	2.56e-06
TCONS_00049912	102181507	STRBP	Novel_lncRNA	102191246	GPHN	0.960896	2.56e-06
TCONS_00083277	102182265	C22H3orf67	Novel_lncRNA	102190431	SGK2	0.960914	2.55e-06
TCONS_00000861	102188353	HSPBAP1	Novel_lncRNA	102181443	INO80D	0.960915	2.55e-06
TCONS_00001068	102189992	P3H2	Novel_lncRNA	102174997	SUN3	0.960917	2.55e-06
TCONS_00021890	102177417	LRP6	Novel_lncRNA	108636534	LOC108636534	0.960929	2.55e-06
TCONS_00000861	102188353	HSPBAP1	Novel_lncRNA	102189948	LOC102189948	0.960937	2.55e-06
TCONS_00062851	102168651	PDGFD	Novel_lncRNA	102177553	ANAPC10	0.960949	2.54e-06
TCONS_00063500	102187614	PLD5	Novel_lncRNA	102169186	LOC102169186	0.960976	2.53e-06
TCONS_00078666	102182831	CCDC127	Novel_lncRNA	102174689	CA10	0.960978	2.53e-06
TCONS_00014574	XLOC_009163	XLOC_009163	Novel_lncRNA	108634770	LOC108634770	0.960979	2.53e-06
TCONS_00007312	102186529	FAM171B	Novel_lncRNA	102169186	LOC102169186	0.960988	2.53e-06
TCONS_00035962	102169005	SH3RF1	Novel_lncRNA	108634770	LOC108634770	0.960989	2.53e-06
TCONS_00098561	XLOC_062381	XLOC_062381	Novel_lncRNA	102168649	NBN	0.960994	2.53e-06
TCONS_00062851	102168651	PDGFD	Novel_lncRNA	108634770	LOC108634770	0.96101	2.53e-06
TCONS_00026726	XLOC_017040	XLOC_017040	Novel_lncRNA	102184378	MCF2L2	0.961012	2.52e-06
TCONS_00107136	108635404	LOC108635404	Novel_lncRNA	102181635	FHIT	0.961013	2.52e-06
TCONS_00016399	102189827	CNOT4	Novel_lncRNA	108634774	LOC108634774	0.961023	2.52e-06
TCONS_00062816	102169778	DCUN1D5	Novel_lncRNA	102183148	MCC	0.961025	2.52e-06
TCONS_00055359	102185932	ABHD12	Novel_lncRNA	102172665	CWC27	0.961029	2.52e-06
TCONS_00037564	102170234	LOC102170234	Novel_lncRNA	102177727	LOC102177727	0.961061	2.51e-06
TCONS_00031267	XLOC_019976	XLOC_019976	Novel_lncRNA	XLOC_011953	XLOC_011953	0.961076	2.51e-06
TCONS_00105078	108634775	LOC108634775	Novel_lncRNA	102189948	LOC102189948	0.961076	2.51e-06
TCONS_00107456	XLOC_068302	XLOC_068302	Novel_lncRNA	XLOC_009157	XLOC_009157	0.961078	2.51e-06
TCONS_00089728	102168225	MYO5B	Novel_lncRNA	108636534	LOC108636534	0.961087	2.5e-06
TCONS_00104374	108634655	LOC108634655	Novel_lncRNA	108634770	LOC108634770	0.961088	2.5e-06
TCONS_00100202	102185993	ATP7A	Novel_lncRNA	102185335	UMAD1	0.961093	2.5e-06
TCONS_00063500	102187614	PLD5	Novel_lncRNA	102185335	UMAD1	0.961095	2.5e-06
TCONS_00089728	102168225	MYO5B	Novel_lncRNA	102180516	C15H11orf42	0.961099	2.5e-06
TCONS_00104890	108634747	LOC108634747	Novel_lncRNA	XLOC_026682	XLOC_026682	0.961107	2.5e-06
TCONS_00083987	102172491	LANCL2	Novel_lncRNA	102191622	CAMKMT	0.961109	2.5e-06
TCONS_00068368	102177553	ANAPC10	Novel_lncRNA	XLOC_004381	XLOC_004381	0.961123	2.49e-06
TCONS_00007312	102186529	FAM171B	Novel_lncRNA	108634770	LOC108634770	0.961161	2.48e-06
TCONS_00104357	108634655	LOC108634655	Novel_lncRNA	102183387	LOC102183387	0.961165	2.48e-06
TCONS_00063500	102187614	PLD5	Novel_lncRNA	102191716	ERICH5	0.961165	2.48e-06
TCONS_00049912	102181507	STRBP	Novel_lncRNA	102171067	GDA	0.961172	2.48e-06
TCONS_00026726	XLOC_017040	XLOC_017040	Novel_lncRNA	102190740	GTDC1	0.961174	2.48e-06
XR_001917334.1	106503653	LOC106503653	Annotated_lncRNA	102170740	CMTM8	0.961184	2.48e-06
TCONS_00107456	XLOC_068302	XLOC_068302	Novel_lncRNA	102179070	CAPS2	0.961185	2.48e-06
TCONS_00105068	108634775	LOC108634775	Novel_lncRNA	102174997	SUN3	0.961186	2.47e-06
TCONS_00079345	102171102	NIPBL	Novel_lncRNA	102181443	INO80D	0.961204	2.47e-06
TCONS_00083277	102182265	C22H3orf67	Novel_lncRNA	108638412	LOC108638412	0.961206	2.47e-06
TCONS_00100203	102185993	ATP7A	Novel_lncRNA	102191622	CAMKMT	0.961218	2.47e-06
TCONS_00062851	102168651	PDGFD	Novel_lncRNA	102168890	ARID2	0.96122	2.47e-06
TCONS_00098561	XLOC_062381	XLOC_062381	Novel_lncRNA	102186177	RNLS	0.961221	2.47e-06
TCONS_00035964	102169005	SH3RF1	Novel_lncRNA	XLOC_028036	XLOC_028036	0.961232	2.46e-06
TCONS_00035964	102169005	SH3RF1	Novel_lncRNA	102170740	CMTM8	0.961243	2.46e-06
TCONS_00063500	102187614	PLD5	Novel_lncRNA	XLOC_001766	XLOC_001766	0.961245	2.46e-06
TCONS_00021890	102177417	LRP6	Novel_lncRNA	102178302	CFAP52	0.961249	2.46e-06
TCONS_00063500	102187614	PLD5	Novel_lncRNA	102168616	CCSER1	0.961264	2.45e-06
TCONS_00107456	XLOC_068302	XLOC_068302	Novel_lncRNA	XLOC_004381	XLOC_004381	0.961274	2.45e-06
TCONS_00083103	102178670	MAGI1	Novel_lncRNA	102174689	CA10	0.96129	2.45e-06
TCONS_00083277	102182265	C22H3orf67	Novel_lncRNA	106502527	LOC106502527	0.961297	2.44e-06
TCONS_00104357	108634655	LOC108634655	Novel_lncRNA	108636534	LOC108636534	0.9613	2.44e-06
TCONS_00107093	XLOC_068035	XLOC_068035	Novel_lncRNA	102190528	TDRD3	0.961307	2.44e-06
TCONS_00078666	102182831	CCDC127	Novel_lncRNA	XLOC_046524	XLOC_046524	0.961315	2.44e-06
TCONS_00100202	102185993	ATP7A	Novel_lncRNA	102180222	DOCK5	0.961326	2.44e-06
TCONS_00037564	102170234	LOC102170234	Novel_lncRNA	102171162	SOCS5	0.961332	2.43e-06
TCONS_00026726	XLOC_017040	XLOC_017040	Novel_lncRNA	XLOC_022645	XLOC_022645	0.961336	2.43e-06
TCONS_00083440	102182642	NT5DC2	Novel_lncRNA	108634774	LOC108634774	0.961364	2.42e-06
TCONS_00017375	102185804	GNAI1	Novel_lncRNA	106502976	NPHP4	0.961369	2.42e-06
TCONS_00104874	108634747	LOC108634747	Novel_lncRNA	102177172	TMEM255B	0.961373	2.42e-06
TCONS_00004634	102173974	DNAJC13	Novel_lncRNA	XLOC_014735	XLOC_014735	0.961376	2.42e-06
TCONS_00107089	XLOC_068035	XLOC_068035	Novel_lncRNA	102183387	LOC102183387	0.961381	2.42e-06
TCONS_00100203	102185993	ATP7A	Novel_lncRNA	102184378	MCF2L2	0.961383	2.42e-06
TCONS_00104890	108634747	LOC108634747	Novel_lncRNA	108636534	LOC108636534	0.961383	2.42e-06
TCONS_00001068	102189992	P3H2	Novel_lncRNA	102178786	PPCS	0.961392	2.42e-06
TCONS_00062816	102169778	DCUN1D5	Novel_lncRNA	102191543	NME7	0.961393	2.42e-06
TCONS_00025728	102176770	PPP3CA	Novel_lncRNA	108637096	LOC108637096	0.961402	2.41e-06
TCONS_00104374	108634655	LOC108634655	Novel_lncRNA	102185335	UMAD1	0.961405	2.41e-06
TCONS_00009736	XLOC_006211	XLOC_006211	Novel_lncRNA	102184378	MCF2L2	0.961408	2.41e-06
TCONS_00104374	108634655	LOC108634655	Novel_lncRNA	108634776	LOC108634776	0.961424	2.41e-06
TCONS_00107034	XLOC_067998	XLOC_067998	Novel_lncRNA	102189948	LOC102189948	0.961437	2.4e-06
TCONS_00021890	102177417	LRP6	Novel_lncRNA	102169752	SRFBP1	0.96144	2.4e-06
TCONS_00035962	102169005	SH3RF1	Novel_lncRNA	1485866	ND5	0.961446	2.4e-06
TCONS_00016399	102189827	CNOT4	Novel_lncRNA	102190431	SGK2	0.96145	2.4e-06
TCONS_00098561	XLOC_062381	XLOC_062381	Novel_lncRNA	102171194	TTC23	0.961453	2.4e-06
TCONS_00038362	102191138	PDSS2	Novel_lncRNA	XLOC_046524	XLOC_046524	0.961455	2.4e-06
TCONS_00107085	XLOC_068035	XLOC_068035	Novel_lncRNA	102183387	LOC102183387	0.961455	2.4e-06
TCONS_00028890	102184717	EFNA5	Novel_lncRNA	102183387	LOC102183387	0.961455	2.4e-06
TCONS_00101113	102189748	TBL1X	Novel_lncRNA	102183387	LOC102183387	0.961455	2.4e-06
TCONS_00107086	XLOC_068035	XLOC_068035	Novel_lncRNA	102183387	LOC102183387	0.961455	2.4e-06
TCONS_00107135	108635404	LOC108635404	Novel_lncRNA	102183387	LOC102183387	0.961455	2.4e-06
TCONS_00107141	108635404	LOC108635404	Novel_lncRNA	102183387	LOC102183387	0.961455	2.4e-06
TCONS_00059256	102187511	CELF1	Novel_lncRNA	102183387	LOC102183387	0.961455	2.4e-06
TCONS_00062540	102174049	ZC3H12C	Novel_lncRNA	102183387	LOC102183387	0.961455	2.4e-06
TCONS_00062935	102183894	PRELP	Novel_lncRNA	102183387	LOC102183387	0.961455	2.4e-06
TCONS_00106358	XLOC_067486	XLOC_067486	Novel_lncRNA	102183387	LOC102183387	0.961455	2.4e-06
TCONS_00010589	102174897	LOC102174897	Novel_lncRNA	102183387	LOC102183387	0.961455	2.4e-06
TCONS_00078993	102174160	RNF180	Novel_lncRNA	102183387	LOC102183387	0.961455	2.4e-06
TCONS_00078182	102169909	ARL15	Novel_lncRNA	102183387	LOC102183387	0.961455	2.4e-06
TCONS_00079344	102171102	NIPBL	Novel_lncRNA	102183387	LOC102183387	0.961455	2.4e-06
TCONS_00075436	XLOC_048175	XLOC_048175	Novel_lncRNA	102183387	LOC102183387	0.961455	2.4e-06
TCONS_00034293	102186591	BNC2	Novel_lncRNA	102183387	LOC102183387	0.961455	2.4e-06
TCONS_00036852	102183872	SHB	Novel_lncRNA	102183387	LOC102183387	0.961455	2.4e-06
TCONS_00040550	102190605	CNKSR3	Novel_lncRNA	102183387	LOC102183387	0.961455	2.4e-06
TCONS_00021876	102168517	DUSP16	Novel_lncRNA	102183387	LOC102183387	0.961455	2.4e-06
TCONS_00063391	102169401	AHCTF1	Novel_lncRNA	102170740	CMTM8	0.961459	2.4e-06
TCONS_00107034	XLOC_067998	XLOC_067998	Novel_lncRNA	102169752	SRFBP1	0.961464	2.4e-06
TCONS_00057890	102168649	NBN	Novel_lncRNA	102169752	SRFBP1	0.96148	2.39e-06
TCONS_00018500	102179544	AHCYL2	Novel_lncRNA	108634776	LOC108634776	0.961485	2.39e-06
TCONS_00104359	108634655	LOC108634655	Novel_lncRNA	102190528	TDRD3	0.961488	2.39e-06
TCONS_00004634	102173974	DNAJC13	Novel_lncRNA	102191622	CAMKMT	0.961488	2.39e-06
TCONS_00051432	XLOC_032990	XLOC_032990	Novel_lncRNA	102169869	IFT74	0.961492	2.39e-06
TCONS_00083277	102182265	C22H3orf67	Novel_lncRNA	102169752	SRFBP1	0.961493	2.39e-06
TCONS_00107129	108635404	LOC108635404	Novel_lncRNA	XLOC_026682	XLOC_026682	0.961495	2.39e-06
TCONS_00055359	102185932	ABHD12	Novel_lncRNA	XLOC_060621	XLOC_060621	0.961501	2.39e-06
TCONS_00079345	102171102	NIPBL	Novel_lncRNA	102186094	DEPDC4	0.961506	2.39e-06
TCONS_00105665	XLOC_066994	XLOC_066994	Novel_lncRNA	108634333	LOC108634333	0.961524	2.38e-06
TCONS_00004634	102173974	DNAJC13	Novel_lncRNA	108636663	LOC108636663	0.961524	2.38e-06
TCONS_00036044	108636534	LOC108636534	Novel_lncRNA	108635155	LOC108635155	0.96154	2.38e-06
TCONS_00105078	108634775	LOC108634775	Novel_lncRNA	108636534	LOC108636534	0.961541	2.38e-06
TCONS_00107074	XLOC_068033	XLOC_068033	Novel_lncRNA	102191716	ERICH5	0.961557	2.37e-06
TCONS_00018500	102179544	AHCYL2	Novel_lncRNA	108634774	LOC108634774	0.96156	2.37e-06
TCONS_00016399	102189827	CNOT4	Novel_lncRNA	102172461	ZNF623	0.961574	2.37e-06
TCONS_00063500	102187614	PLD5	Novel_lncRNA	108635079	LOC108635079	0.961575	2.37e-06
TCONS_00006790	XLOC_004475	XLOC_004475	Novel_lncRNA	102183387	LOC102183387	0.961585	2.36e-06
TCONS_00107085	XLOC_068035	XLOC_068035	Novel_lncRNA	108636534	LOC108636534	0.96159	2.36e-06
TCONS_00028890	102184717	EFNA5	Novel_lncRNA	108636534	LOC108636534	0.96159	2.36e-06
TCONS_00101113	102189748	TBL1X	Novel_lncRNA	108636534	LOC108636534	0.96159	2.36e-06
TCONS_00107086	XLOC_068035	XLOC_068035	Novel_lncRNA	108636534	LOC108636534	0.96159	2.36e-06
TCONS_00107135	108635404	LOC108635404	Novel_lncRNA	108636534	LOC108636534	0.96159	2.36e-06
TCONS_00107141	108635404	LOC108635404	Novel_lncRNA	108636534	LOC108636534	0.96159	2.36e-06
TCONS_00059256	102187511	CELF1	Novel_lncRNA	108636534	LOC108636534	0.96159	2.36e-06
TCONS_00062540	102174049	ZC3H12C	Novel_lncRNA	108636534	LOC108636534	0.96159	2.36e-06
TCONS_00062935	102183894	PRELP	Novel_lncRNA	108636534	LOC108636534	0.96159	2.36e-06
TCONS_00106358	XLOC_067486	XLOC_067486	Novel_lncRNA	108636534	LOC108636534	0.96159	2.36e-06
TCONS_00010589	102174897	LOC102174897	Novel_lncRNA	108636534	LOC108636534	0.96159	2.36e-06
TCONS_00078993	102174160	RNF180	Novel_lncRNA	108636534	LOC108636534	0.96159	2.36e-06
TCONS_00078182	102169909	ARL15	Novel_lncRNA	108636534	LOC108636534	0.96159	2.36e-06
TCONS_00079344	102171102	NIPBL	Novel_lncRNA	108636534	LOC108636534	0.96159	2.36e-06
TCONS_00075436	XLOC_048175	XLOC_048175	Novel_lncRNA	108636534	LOC108636534	0.96159	2.36e-06
TCONS_00034293	102186591	BNC2	Novel_lncRNA	108636534	LOC108636534	0.96159	2.36e-06
TCONS_00036852	102183872	SHB	Novel_lncRNA	108636534	LOC108636534	0.96159	2.36e-06
TCONS_00040550	102190605	CNKSR3	Novel_lncRNA	108636534	LOC108636534	0.96159	2.36e-06
TCONS_00021876	102168517	DUSP16	Novel_lncRNA	108636534	LOC108636534	0.96159	2.36e-06
TCONS_00028876	102181389	FBXL17	Novel_lncRNA	102169869	IFT74	0.961591	2.36e-06
TCONS_00063500	102187614	PLD5	Novel_lncRNA	XLOC_064401	XLOC_064401	0.961605	2.36e-06
TCONS_00049912	102181507	STRBP	Novel_lncRNA	XLOC_063489	XLOC_063489	0.961612	2.36e-06
TCONS_00079345	102171102	NIPBL	Novel_lncRNA	108635964	TRNAC-GCA	0.961612	2.36e-06
TCONS_00107136	108635404	LOC108635404	Novel_lncRNA	108634775	LOC108634775	0.961615	2.36e-06
TCONS_00104874	108634747	LOC108634747	Novel_lncRNA	102181821	LOC102181821	0.961642	2.35e-06
TCONS_00016399	102189827	CNOT4	Novel_lncRNA	102177172	TMEM255B	0.96165	2.35e-06
XR_001917334.1	106503653	LOC106503653	Annotated_lncRNA	102190528	TDRD3	0.961651	2.35e-06
TCONS_00035964	102169005	SH3RF1	Novel_lncRNA	102190528	TDRD3	0.961655	2.34e-06
TCONS_00097124	102188740	VCL	Novel_lncRNA	XLOC_046524	XLOC_046524	0.96167	2.34e-06
TCONS_00079345	102171102	NIPBL	Novel_lncRNA	102186177	RNLS	0.961673	2.34e-06
TCONS_00105053	108634775	LOC108634775	Novel_lncRNA	102190528	TDRD3	0.961678	2.34e-06
TCONS_00025728	102176770	PPP3CA	Novel_lncRNA	102191246	GPHN	0.96169	2.34e-06
TCONS_00035964	102169005	SH3RF1	Novel_lncRNA	102183387	LOC102183387	0.961707	2.33e-06
TCONS_00026726	XLOC_017040	XLOC_017040	Novel_lncRNA	108635964	TRNAC-GCA	0.961718	2.33e-06
TCONS_00004634	102173974	DNAJC13	Novel_lncRNA	XLOC_022645	XLOC_022645	0.961723	2.33e-06
TCONS_00046774	XLOC_030088	XLOC_030088	Novel_lncRNA	1485867	ND6	0.961738	2.32e-06
[truncated: 12,391 more rows]

## Sheet: Table S4
Table S4 Co-expression relationships between DE lncRNAs and DE mRNAs in catagen phase
lncRNA_ID	lncRNA_Gene_ID	lncRNA_Gene_Symbol	Status	mRNA_Gene_ID	mRNA_Gene_Symbol	Pearson_correlation	Pvalue
TCONS_00000133	100861175	LOC100861175	Novel_lncRNA	102181301	FBXW2	0.953933	1.86e-05
TCONS_00063444	106503767	LOC106503767	Novel_lncRNA	102181301	FBXW2	0.95402	1.85e-05
TCONS_00060082	102184583	SGMS1	Novel_lncRNA	102181301	FBXW2	0.95402	1.85e-05
TCONS_00013969	XLOC_006281	XLOC_006281	Novel_lncRNA	102181301	FBXW2	0.95402	1.85e-05
TCONS_00063125	XLOC_028952	XLOC_028952	Novel_lncRNA	102181301	FBXW2	0.95402	1.85e-05
TCONS_00023611	102191137	PTBP3	Novel_lncRNA	102181301	FBXW2	0.95402	1.85e-05
TCONS_00067026	XLOC_031051	XLOC_031051	Novel_lncRNA	102181301	FBXW2	0.954285	1.81e-05
XR_001919881.1	106503343	LRRC28	Annotated_lncRNA	102180520	LOC102180520	0.962095	8.63e-06
TCONS_00068049	108634845	LOC108634845	Novel_lncRNA	102177133	DYDC2	0.965902	5.68e-06
TCONS_00049133	108638310	LOC108638310	Novel_lncRNA	102177133	DYDC2	0.966327	5.4e-06
XR_001296715.2	106503034	LOC106503034	Annotated_lncRNA	102180520	LOC102180520	0.976287	1.34e-06
XR_001917656.1	108634591	LOC108634591	Annotated_lncRNA	108633279	LOC108633279	0.984327	2.59e-07
XR_001297083.2	108633165	LOC108633165	Annotated_lncRNA	108633279	LOC108633279	0.984756	2.32e-07
TCONS_00068562	108635081	LOC108635081	Novel_lncRNA	102175045	HBBC	0.985487	1.91e-07
TCONS_00039442	102168561	C16H1orf159	Novel_lncRNA	108633279	LOC108633279	0.986089	1.61e-07
TCONS_00067042	108634655	LOC108634655	Novel_lncRNA	108633279	LOC108633279	0.986097	1.61e-07
TCONS_00068047	108634845	LOC108634845	Novel_lncRNA	102183317	LOC102183317	0.986139	1.59e-07
TCONS_00067042	108634655	LOC108634655	Novel_lncRNA	102182683	LOC102182683	0.986817	1.3e-07
TCONS_00068249	XLOC_031657	XLOC_031657	Novel_lncRNA	102183317	LOC102183317	0.987415	1.08e-07
TCONS_00063122	XLOC_028952	XLOC_028952	Novel_lncRNA	102183317	LOC102183317	0.98787	9.33e-08
TCONS_00067037	XLOC_031052	XLOC_031052	Novel_lncRNA	102183317	LOC102183317	0.98787	9.33e-08
TCONS_00068239	XLOC_031657	XLOC_031657	Novel_lncRNA	102183317	LOC102183317	0.987872	9.33e-08
TCONS_00068217	XLOC_031657	XLOC_031657	Novel_lncRNA	102183317	LOC102183317	0.987881	9.3e-08
TCONS_00068761	XLOC_032017	XLOC_032017	Novel_lncRNA	102184551	LOC102184551	0.987972	9.02e-08
TCONS_00068237	XLOC_031657	XLOC_031657	Novel_lncRNA	102184551	LOC102184551	0.988009	8.92e-08
TCONS_00027321	100861305	RORA	Novel_lncRNA	102184551	LOC102184551	0.988009	8.92e-08
TCONS_00007401	XLOC_003238	XLOC_003238	Novel_lncRNA	102183317	LOC102183317	0.988084	8.69e-08
TCONS_00039442	102168561	C16H1orf159	Novel_lncRNA	102182683	LOC102182683	0.988586	7.32e-08
XR_001917656.1	108634591	LOC108634591	Annotated_lncRNA	102182683	LOC102182683	0.988601	7.29e-08
TCONS_00005898	XLOC_002590	XLOC_002590	Novel_lncRNA	102184551	LOC102184551	0.988658	7.14e-08
TCONS_00001419	100861311	LOC100861311	Novel_lncRNA	102184551	LOC102184551	0.988688	7.07e-08
XR_001918825.1	102185409	LUZP1	Annotated_lncRNA	102184551	LOC102184551	0.988743	6.93e-08
XR_001297083.2	108633165	LOC108633165	Annotated_lncRNA	102182683	LOC102182683	0.991257	2.53e-08
XR_001919880.1	106503343	LRRC28	Annotated_lncRNA	102183317	LOC102183317	0.991327	2.45e-08
TCONS_00005898	XLOC_002590	XLOC_002590	Novel_lncRNA	102181160	LOC102181160	0.991985	1.79e-08
TCONS_00001419	100861311	LOC100861311	Novel_lncRNA	102181160	LOC102181160	0.992321	1.51e-08
TCONS_00068761	XLOC_032017	XLOC_032017	Novel_lncRNA	102181160	LOC102181160	0.993028	1.03e-08
TCONS_00068237	XLOC_031657	XLOC_031657	Novel_lncRNA	102181160	LOC102181160	0.993061	1.01e-08
TCONS_00027321	100861305	RORA	Novel_lncRNA	102181160	LOC102181160	0.993061	1.01e-08
TCONS_00068220	XLOC_031657	XLOC_031657	Novel_lncRNA	102175045	HBBC	0.993079	9.95e-09
XR_001918825.1	102185409	LUZP1	Annotated_lncRNA	102181160	LOC102181160	0.993367	8.4e-09
TCONS_00068047	108634845	LOC108634845	Novel_lncRNA	102184677	LOC102184677	0.995703	1.48e-09
XR_001297083.2	108633165	LOC108633165	Annotated_lncRNA	102178438	CXCL8	0.99572	1.46e-09
TCONS_00068249	XLOC_031657	XLOC_031657	Novel_lncRNA	102184677	LOC102184677	0.995962	1.16e-09
TCONS_00068239	XLOC_031657	XLOC_031657	Novel_lncRNA	102184677	LOC102184677	0.99608	1.03e-09
TCONS_00063122	XLOC_028952	XLOC_028952	Novel_lncRNA	102184677	LOC102184677	0.996081	1.03e-09
TCONS_00067037	XLOC_031052	XLOC_031052	Novel_lncRNA	102184677	LOC102184677	0.996081	1.03e-09
XR_001297083.2	108633165	LOC108633165	Annotated_lncRNA	102169149	LOC102169149	0.99613	9.77e-10
TCONS_00068217	XLOC_031657	XLOC_031657	Novel_lncRNA	102184677	LOC102184677	0.996132	9.75e-10
TCONS_00007401	XLOC_003238	XLOC_003238	Novel_lncRNA	102184677	LOC102184677	0.996257	8.55e-10
XR_001919880.1	106503343	LRRC28	Annotated_lncRNA	102184677	LOC102184677	0.996843	4.33e-10
XR_001297083.2	108633165	LOC108633165	Annotated_lncRNA	102174709	PRICKLE4	0.996923	3.91e-10
XR_001297083.2	108633165	LOC108633165	Annotated_lncRNA	102180194	LOC102180194	0.996973	3.66e-10
XR_001297083.2	108633165	LOC108633165	Annotated_lncRNA	102180556	LOC102180556	0.997125	2.98e-10
XR_001917656.1	108634591	LOC108634591	Annotated_lncRNA	102169149	LOC102169149	0.99743	1.9e-10
XR_001917656.1	108634591	LOC108634591	Annotated_lncRNA	102178438	CXCL8	0.997438	1.88e-10
TCONS_00067042	108634655	LOC108634655	Novel_lncRNA	102178438	CXCL8	0.997536	1.61e-10
XR_001297083.2	108633165	LOC108633165	Annotated_lncRNA	108633803	LOC108633803	0.997619	1.4e-10
TCONS_00067042	108634655	LOC108634655	Novel_lncRNA	102169149	LOC102169149	0.997631	1.37e-10
XR_001917656.1	108634591	LOC108634591	Annotated_lncRNA	102180556	LOC102180556	0.997872	8.95e-11
TCONS_00067042	108634655	LOC108634655	Novel_lncRNA	102180556	LOC102180556	0.997972	7.38e-11
TCONS_00039442	102168561	C16H1orf159	Novel_lncRNA	102169149	LOC102169149	0.998192	4.67e-11
XR_001917656.1	108634591	LOC108634591	Annotated_lncRNA	102180194	LOC102180194	0.998375	3.04e-11
TCONS_00039442	102168561	C16H1orf159	Novel_lncRNA	102178438	CXCL8	0.998435	2.62e-11
XR_001297083.2	108633165	LOC108633165	Annotated_lncRNA	108633237	LOC108633237	0.998473	2.38e-11
TCONS_00039442	102168561	C16H1orf159	Novel_lncRNA	102180556	LOC102180556	0.998574	1.8e-11
XR_001297083.2	108633165	LOC108633165	Annotated_lncRNA	102182235	IL36B	0.998706	1.23e-11
XR_001917656.1	108634591	LOC108634591	Annotated_lncRNA	108633237	LOC108633237	0.998775	9.84e-12
XR_001917656.1	108634591	LOC108634591	Annotated_lncRNA	102174709	PRICKLE4	0.998799	9.09e-12
TCONS_00067042	108634655	LOC108634655	Novel_lncRNA	108633237	LOC108633237	0.998849	7.68e-12
TCONS_00039442	102168561	C16H1orf159	Novel_lncRNA	102180194	LOC102180194	0.999173	2.04e-12
XR_001917656.1	108634591	LOC108634591	Annotated_lncRNA	108633803	LOC108633803	0.999188	1.9e-12
TCONS_00067042	108634655	LOC108634655	Novel_lncRNA	108633803	LOC108633803	0.999303	1.03e-12
TCONS_00039442	102168561	C16H1orf159	Novel_lncRNA	108633237	LOC108633237	0.99933	8.81e-13
TCONS_00067042	108634655	LOC108634655	Novel_lncRNA	102180194	LOC102180194	0.999344	8.09e-13
XR_001917656.1	108634591	LOC108634591	Annotated_lncRNA	102182235	IL36B	0.999354	7.62e-13
TCONS_00067042	108634655	LOC108634655	Novel_lncRNA	102182235	IL36B	0.999432	4.55e-13
TCONS_00039442	102168561	C16H1orf159	Novel_lncRNA	102174709	PRICKLE4	0.999492	2.92e-13
TCONS_00067042	108634655	LOC108634655	Novel_lncRNA	102174709	PRICKLE4	0.999651	6.49e-14
TCONS_00039442	102168561	C16H1orf159	Novel_lncRNA	108633803	LOC108633803	0.999781	1.01e-14
TCONS_00039442	102168561	C16H1orf159	Novel_lncRNA	102182235	IL36B	0.999792	8.11e-15

## Sheet: Table S5
Table S5 Co-expression relationships between DE lncRNAs and DE mRNAs in telogen phase
lncRNA_ID	lncRNA_Gene_ID	lncRNA_Gene_Symbol	Status	mRNA_Gene_ID	mRNA_Gene_Symbol	Pearson_correlation	Pvalue
TCONS_00066043	XLOC_030824	XLOC_030824	Novel_lncRNA	102176316	RPS28	0.996197	9.10686e-10
TCONS_00066043	XLOC_030824	XLOC_030824	Novel_lncRNA	102172255	LOC102172255	0.998615	1.60608e-11
TCONS_00066043	XLOC_030824	XLOC_030824	Novel_lncRNA	102188032	LOC102188032	0.974308	1.84801e-06
TCONS_00066049	XLOC_030825	XLOC_030825	Novel_lncRNA	102175634	LOC102175634	0.962048	8.66965e-06
TCONS_00066049	XLOC_030825	XLOC_030825	Novel_lncRNA	102187477	IL13	0.958072	1.28522e-05
TCONS_00066049	XLOC_030825	XLOC_030825	Novel_lncRNA	102186015	FBP1	0.951888	2.21162e-05
TCONS_00066049	XLOC_030825	XLOC_030825	Novel_lncRNA	106502554	DUOX2	0.960748	9.90452e-06
TCONS_00066049	XLOC_030825	XLOC_030825	Novel_lncRNA	102184911	DUOXA2	0.967336	4.78799e-06
TCONS_00066049	XLOC_030825	XLOC_030825	Novel_lncRNA	102186320	LOC102186320	0.971006	2.98545e-06
TCONS_00066049	XLOC_030825	XLOC_030825	Novel_lncRNA	102179495	KCNB2	0.95937	1.13506e-05
TCONS_00066049	XLOC_030825	XLOC_030825	Novel_lncRNA	102169419	WNT9B	0.963806	7.18643e-06
TCONS_00066049	XLOC_030825	XLOC_030825	Novel_lncRNA	102175987	LOC102175987	0.953957	1.85962e-05
TCONS_00066049	XLOC_030825	XLOC_030825	Novel_lncRNA	102191571	NETO1	0.968587	4.10179e-06
TCONS_00066049	XLOC_030825	XLOC_030825	Novel_lncRNA	102173926	IL13RA2	0.964361	6.76041e-06
TCONS_00066517	108634747	LOC108634747	Novel_lncRNA	100860779	LALBA	0.977377	1.11512e-06
XR_001917702.1	108634848	LOC108634848	Annotated_lncRNA	102190011	RAB3B	0.957869	1.31e-05
TCONS_00067104	108634845	LOC108634845	Novel_lncRNA	102183480	LOC102183480	0.979648	7.32481e-07
TCONS_00067104	108634845	LOC108634845	Novel_lncRNA	102174800	SLC2A1	0.975251	1.59307e-06
TCONS_00067104	108634845	LOC108634845	Novel_lncRNA	102175634	LOC102175634	0.998334	3.36671e-11
TCONS_00067104	108634845	LOC108634845	Novel_lncRNA	102187477	IL13	0.991665	2.09076e-08
TCONS_00067104	108634845	LOC108634845	Novel_lncRNA	102186015	FBP1	0.996937	3.83508e-10
TCONS_00067104	108634845	LOC108634845	Novel_lncRNA	106502554	DUOX2	0.992578	1.31573e-08
TCONS_00067104	108634845	LOC108634845	Novel_lncRNA	102184911	DUOXA2	0.997789	1.04219e-10
TCONS_00067104	108634845	LOC108634845	Novel_lncRNA	102185477	TGM2	0.984642	2.38946e-07
TCONS_00067104	108634845	LOC108634845	Novel_lncRNA	102186320	LOC102186320	0.988209	8.33725e-08
TCONS_00067104	108634845	LOC108634845	Novel_lncRNA	102179495	KCNB2	0.960408	1.02479e-05
TCONS_00067104	108634845	LOC108634845	Novel_lncRNA	102186681	LOC102186681	0.991116	2.69584e-08
TCONS_00067104	108634845	LOC108634845	Novel_lncRNA	102179132	LOC102179132	0.995819	1.33005e-09
TCONS_00067104	108634845	LOC108634845	Novel_lncRNA	102175987	LOC102175987	0.991113	2.69941e-08
TCONS_00067104	108634845	LOC108634845	Novel_lncRNA	102173926	IL13RA2	0.987576	1.02678e-07
TCONS_00067104	108634845	LOC108634845	Novel_lncRNA	102178702	DBX2	0.993115	9.75129e-09
TCONS_00067105	108634845	LOC108634845	Novel_lncRNA	XLOC_024066	XLOC_024066	1	5.38399e-62
TCONS_00067105	108634845	LOC108634845	Novel_lncRNA	1485859	COX2	0.99964	7.32398e-14
TCONS_00067105	108634845	LOC108634845	Novel_lncRNA	1485861	ATP6	0.999121	2.60597e-12
TCONS_00067106	108634845	LOC108634845	Novel_lncRNA	100860779	LALBA	0.977377	1.11512e-06
TCONS_00067107	108634845	LOC108634845	Novel_lncRNA	XLOC_011360	XLOC_011360	0.993126	9.68681e-09
TCONS_00067109	108634845	LOC108634845	Novel_lncRNA	102176316	RPS28	0.996197	9.10686e-10
TCONS_00067109	108634845	LOC108634845	Novel_lncRNA	102172255	LOC102172255	0.998615	1.60608e-11
TCONS_00067109	108634845	LOC108634845	Novel_lncRNA	102188032	LOC102188032	0.974308	1.84801e-06
TCONS_00067098	108634845	LOC108634845	Novel_lncRNA	102184677	LOC102184677	0.973655	2.0417e-06
TCONS_00068254	XLOC_032121	XLOC_032121	Novel_lncRNA	100860779	LALBA	0.977378	1.11501e-06
TCONS_00068255	XLOC_032121	XLOC_032121	Novel_lncRNA	100860779	LALBA	0.977377	1.11512e-06
TCONS_00068281	108635404	LOC108635404	Novel_lncRNA	102184677	LOC102184677	0.995918	1.20904e-09
TCONS_00068293	108635404	LOC108635404	Novel_lncRNA	108635030	LOC108635030	0.976002	1.40962e-06
TCONS_00067234	XLOC_031381	XLOC_031381	Novel_lncRNA	XLOC_011360	XLOC_011360	0.992209	1.59686e-08
TCONS_00067236	XLOC_031381	XLOC_031381	Novel_lncRNA	102183480	LOC102183480	0.980503	6.17525e-07
TCONS_00067236	XLOC_031381	XLOC_031381	Novel_lncRNA	102174800	SLC2A1	0.97648	1.30141e-06
TCONS_00067236	XLOC_031381	XLOC_031381	Novel_lncRNA	102175634	LOC102175634	0.998566	1.84931e-11
TCONS_00067236	XLOC_031381	XLOC_031381	Novel_lncRNA	102187477	IL13	0.991067	2.75596e-08
TCONS_00067236	XLOC_031381	XLOC_031381	Novel_lncRNA	102186015	FBP1	0.996199	9.08898e-10
TCONS_00067236	XLOC_031381	XLOC_031381	Novel_lncRNA	106502554	DUOX2	0.993404	8.21574e-09
TCONS_00067236	XLOC_031381	XLOC_031381	Novel_lncRNA	102184911	DUOXA2	0.997903	8.44493e-11
TCONS_00067236	XLOC_031381	XLOC_031381	Novel_lncRNA	102185477	TGM2	0.985092	2.12276e-07
TCONS_00067236	XLOC_031381	XLOC_031381	Novel_lncRNA	102186320	LOC102186320	0.989146	5.99245e-08
TCONS_00067236	XLOC_031381	XLOC_031381	Novel_lncRNA	102179495	KCNB2	0.959927	1.07481e-05
TCONS_00067236	XLOC_031381	XLOC_031381	Novel_lncRNA	102186681	LOC102186681	0.99064	3.31981e-08
TCONS_00067236	XLOC_031381	XLOC_031381	Novel_lncRNA	102179132	LOC102179132	0.995651	1.55726e-09
TCONS_00067236	XLOC_031381	XLOC_031381	Novel_lncRNA	102175987	LOC102175987	0.990801	3.09779e-08
TCONS_00067236	XLOC_031381	XLOC_031381	Novel_lncRNA	102173926	IL13RA2	0.989207	5.85911e-08
TCONS_00067236	XLOC_031381	XLOC_031381	Novel_lncRNA	102178702	DBX2	0.993021	1.02939e-08
TCONS_00067270	XLOC_031412	XLOC_031412	Novel_lncRNA	XLOC_011360	XLOC_011360	0.993462	7.92919e-09
TCONS_00067158	108634870	LOC108634870	Novel_lncRNA	100860779	LALBA	0.977488	1.0936e-06
TCONS_00067159	108634870	LOC108634870	Novel_lncRNA	102172204	LOC102172204	0.991527	2.23228e-08
TCONS_00067159	108634870	LOC108634870	Novel_lncRNA	102181752	LOC102181752	0.981311	5.21908e-07
TCONS_00067159	108634870	LOC108634870	Novel_lncRNA	102171764	LOC102171764	0.989235	5.799e-08
TCONS_00067159	108634870	LOC108634870	Novel_lncRNA	102175043	CA3	0.992139	1.65536e-08
TCONS_00067159	108634870	LOC108634870	Novel_lncRNA	102171111	IL17F	0.989501	5.24937e-08
TCONS_00067159	108634870	LOC108634870	Novel_lncRNA	102186564	NRK	0.957511	1.35442e-05
TCONS_00067159	108634870	LOC108634870	Novel_lncRNA	108634962	LOC108634962	0.987729	9.77469e-08
TCONS_00067169	108634870	LOC108634870	Novel_lncRNA	108636121	LOC108636121	0.967229	4.85038e-06
TCONS_00067316	XLOC_031422	XLOC_031422	Novel_lncRNA	102183480	LOC102183480	0.979648	7.32481e-07
TCONS_00067316	XLOC_031422	XLOC_031422	Novel_lncRNA	102174800	SLC2A1	0.975251	1.59307e-06
TCONS_00067316	XLOC_031422	XLOC_031422	Novel_lncRNA	102175634	LOC102175634	0.998334	3.36671e-11
TCONS_00067316	XLOC_031422	XLOC_031422	Novel_lncRNA	102187477	IL13	0.991665	2.09076e-08
TCONS_00067316	XLOC_031422	XLOC_031422	Novel_lncRNA	102186015	FBP1	0.996937	3.83508e-10
TCONS_00067316	XLOC_031422	XLOC_031422	Novel_lncRNA	106502554	DUOX2	0.992578	1.31573e-08
TCONS_00067316	XLOC_031422	XLOC_031422	Novel_lncRNA	102184911	DUOXA2	0.997789	1.04219e-10
TCONS_00067316	XLOC_031422	XLOC_031422	Novel_lncRNA	102185477	TGM2	0.984642	2.38946e-07
TCONS_00067316	XLOC_031422	XLOC_031422	Novel_lncRNA	102186320	LOC102186320	0.988209	8.33725e-08
TCONS_00067316	XLOC_031422	XLOC_031422	Novel_lncRNA	102179495	KCNB2	0.960408	1.02479e-05
TCONS_00067316	XLOC_031422	XLOC_031422	Novel_lncRNA	102186681	LOC102186681	0.991116	2.69584e-08
TCONS_00067316	XLOC_031422	XLOC_031422	Novel_lncRNA	102179132	LOC102179132	0.995819	1.33005e-09
TCONS_00067316	XLOC_031422	XLOC_031422	Novel_lncRNA	102175987	LOC102175987	0.991113	2.69941e-08
TCONS_00067316	XLOC_031422	XLOC_031422	Novel_lncRNA	102173926	IL13RA2	0.987576	1.02678e-07
TCONS_00067316	XLOC_031422	XLOC_031422	Novel_lncRNA	102178702	DBX2	0.993115	9.75129e-09
TCONS_00067287	XLOC_031420	XLOC_031420	Novel_lncRNA	100750242	CSN1S1	0.991771	1.98677e-08
TCONS_00067287	XLOC_031420	XLOC_031420	Novel_lncRNA	100860784	CSN2	0.986523	1.41987e-07
TCONS_00067287	XLOC_031420	XLOC_031420	Novel_lncRNA	100861229	CSN1S2	0.98759	1.02247e-07
TCONS_00067287	XLOC_031420	XLOC_031420	Novel_lncRNA	100861231	CSN3	0.98371	3.02073e-07
TCONS_00067614	108635081	LOC108635081	Novel_lncRNA	102172204	LOC102172204	0.991364	2.40793e-08
TCONS_00067614	108635081	LOC108635081	Novel_lncRNA	102181752	LOC102181752	0.9813	5.23086e-07
TCONS_00067614	108635081	LOC108635081	Novel_lncRNA	102171764	LOC102171764	0.989031	6.24947e-08
TCONS_00067614	108635081	LOC108635081	Novel_lncRNA	102175043	CA3	0.991886	1.87786e-08
TCONS_00067614	108635081	LOC108635081	Novel_lncRNA	102171111	IL17F	0.989171	5.93765e-08
TCONS_00067614	108635081	LOC108635081	Novel_lncRNA	102186564	NRK	0.957307	1.38032e-05
TCONS_00067614	108635081	LOC108635081	Novel_lncRNA	108634962	LOC108634962	0.987308	1.1179e-07
TCONS_00067661	108635079	LOC108635079	Novel_lncRNA	102183480	LOC102183480	0.979648	7.32481e-07
TCONS_00067661	108635079	LOC108635079	Novel_lncRNA	102174800	SLC2A1	0.975251	1.59307e-06
TCONS_00067661	108635079	LOC108635079	Novel_lncRNA	102175634	LOC102175634	0.998334	3.36671e-11
TCONS_00067661	108635079	LOC108635079	Novel_lncRNA	102187477	IL13	0.991665	2.09076e-08
TCONS_00067661	108635079	LOC108635079	Novel_lncRNA	102186015	FBP1	0.996937	3.83508e-10
TCONS_00067661	108635079	LOC108635079	Novel_lncRNA	106502554	DUOX2	0.992578	1.31573e-08
TCONS_00067661	108635079	LOC108635079	Novel_lncRNA	102184911	DUOXA2	0.997789	1.04219e-10
TCONS_00067661	108635079	LOC108635079	Novel_lncRNA	102185477	TGM2	0.984642	2.38946e-07
TCONS_00067661	108635079	LOC108635079	Novel_lncRNA	102186320	LOC102186320	0.988209	8.33725e-08
TCONS_00067661	108635079	LOC108635079	Novel_lncRNA	102179495	KCNB2	0.960408	1.02479e-05
TCONS_00067661	108635079	LOC108635079	Novel_lncRNA	102186681	LOC102186681	0.991116	2.69584e-08
TCONS_00067661	108635079	LOC108635079	Novel_lncRNA	102179132	LOC102179132	0.995819	1.33005e-09
TCONS_00067661	108635079	LOC108635079	Novel_lncRNA	102175987	LOC102175987	0.991113	2.69941e-08
TCONS_00067661	108635079	LOC108635079	Novel_lncRNA	102173926	IL13RA2	0.987576	1.02678e-07
TCONS_00067661	108635079	LOC108635079	Novel_lncRNA	102178702	DBX2	0.993115	9.75129e-09
TCONS_00067664	108635079	LOC108635079	Novel_lncRNA	102172204	LOC102172204	0.991364	2.40793e-08
TCONS_00067664	108635079	LOC108635079	Novel_lncRNA	102181752	LOC102181752	0.9813	5.23086e-07
TCONS_00067664	108635079	LOC108635079	Novel_lncRNA	102171764	LOC102171764	0.989031	6.24947e-08
TCONS_00067664	108635079	LOC108635079	Novel_lncRNA	102175043	CA3	0.991886	1.87786e-08
TCONS_00067664	108635079	LOC108635079	Novel_lncRNA	102171111	IL17F	0.989171	5.93765e-08
TCONS_00067664	108635079	LOC108635079	Novel_lncRNA	102186564	NRK	0.957307	1.38032e-05
TCONS_00067664	108635079	LOC108635079	Novel_lncRNA	108634962	LOC108634962	0.987308	1.1179e-07
TCONS_00067665	108635079	LOC108635079	Novel_lncRNA	102172204	LOC102172204	0.991364	2.40793e-08
TCONS_00067665	108635079	LOC108635079	Novel_lncRNA	102181752	LOC102181752	0.9813	5.23086e-07
TCONS_00067665	108635079	LOC108635079	Novel_lncRNA	102171764	LOC102171764	0.989031	6.24947e-08
TCONS_00067665	108635079	LOC108635079	Novel_lncRNA	102175043	CA3	0.991886	1.87786e-08
TCONS_00067665	108635079	LOC108635079	Novel_lncRNA	102171111	IL17F	0.989171	5.93765e-08
TCONS_00067665	108635079	LOC108635079	Novel_lncRNA	102186564	NRK	0.957307	1.38032e-05
TCONS_00067665	108635079	LOC108635079	Novel_lncRNA	108634962	LOC108634962	0.987308	1.1179e-07
TCONS_00067666	108635079	LOC108635079	Novel_lncRNA	102172204	LOC102172204	0.984181	2.68767e-07
TCONS_00067666	108635079	LOC108635079	Novel_lncRNA	102181752	LOC102181752	0.994821	3.12747e-09
TCONS_00067666	108635079	LOC108635079	Novel_lncRNA	102175043	CA3	0.957856	1.31152e-05
TCONS_00067666	108635079	LOC108635079	Novel_lncRNA	102171111	IL17F	0.952206	2.15442e-05
TCONS_00067666	108635079	LOC108635079	Novel_lncRNA	102186564	NRK	0.982105	4.39093e-07
TCONS_00067678	108635080	LOC108635080	Novel_lncRNA	102172204	LOC102172204	0.991364	2.40793e-08
TCONS_00067678	108635080	LOC108635080	Novel_lncRNA	102181752	LOC102181752	0.9813	5.23086e-07
TCONS_00067678	108635080	LOC108635080	Novel_lncRNA	102171764	LOC102171764	0.989031	6.24947e-08
TCONS_00067678	108635080	LOC108635080	Novel_lncRNA	102175043	CA3	0.991886	1.87786e-08
TCONS_00067678	108635080	LOC108635080	Novel_lncRNA	102171111	IL17F	0.989171	5.93765e-08
TCONS_00067678	108635080	LOC108635080	Novel_lncRNA	102186564	NRK	0.957307	1.38032e-05
TCONS_00067678	108635080	LOC108635080	Novel_lncRNA	108634962	LOC108634962	0.987308	1.1179e-07
TCONS_00067611	108635081	LOC108635081	Novel_lncRNA	XLOC_024066	XLOC_024066	0.994137	5.1337e-09
TCONS_00067611	108635081	LOC108635081	Novel_lncRNA	1485859	COX2	0.993461	7.93419e-09
TCONS_00067611	108635081	LOC108635081	Novel_lncRNA	1485861	ATP6	0.993757	6.59629e-09
TCONS_00067663	108635079	LOC108635079	Novel_lncRNA	102172204	LOC102172204	0.991364	2.40793e-08
TCONS_00067663	108635079	LOC108635079	Novel_lncRNA	102181752	LOC102181752	0.9813	5.23086e-07
TCONS_00067663	108635079	LOC108635079	Novel_lncRNA	102171764	LOC102171764	0.989031	6.24947e-08
TCONS_00067663	108635079	LOC108635079	Novel_lncRNA	102175043	CA3	0.991886	1.87786e-08
TCONS_00067663	108635079	LOC108635079	Novel_lncRNA	102171111	IL17F	0.989171	5.93765e-08
TCONS_00067663	108635079	LOC108635079	Novel_lncRNA	102186564	NRK	0.957307	1.38032e-05
TCONS_00067663	108635079	LOC108635079	Novel_lncRNA	108634962	LOC108634962	0.987308	1.1179e-07
TCONS_00068044	XLOC_031951	XLOC_031951	Novel_lncRNA	102172204	LOC102172204	0.993014	1.03323e-08
TCONS_00068044	XLOC_031951	XLOC_031951	Novel_lncRNA	102181752	LOC102181752	0.984275	2.62487e-07
TCONS_00068044	XLOC_031951	XLOC_031951	Novel_lncRNA	102171764	LOC102171764	0.988452	7.67203e-08
TCONS_00068044	XLOC_031951	XLOC_031951	Novel_lncRNA	102175043	CA3	0.991776	1.9812e-08
TCONS_00068044	XLOC_031951	XLOC_031951	Novel_lncRNA	102171111	IL17F	0.988859	6.6507e-08
TCONS_00068044	XLOC_031951	XLOC_031951	Novel_lncRNA	102186564	NRK	0.960987	9.66787e-06
TCONS_00068044	XLOC_031951	XLOC_031951	Novel_lncRNA	108634962	LOC108634962	0.986819	1.29993e-07
TCONS_00004169	102190558	FAM168B	Novel_lncRNA	108635030	LOC108635030	0.976002	1.40962e-06
TCONS_00004170	102190558	FAM168B	Novel_lncRNA	108635030	LOC108635030	0.976002	1.40962e-06
XR_001296335.2	108633260	LOC108633260	Annotated_lncRNA	102190011	RAB3B	0.979215	7.96292e-07
XR_001918701.1	106502534	INAFM2	Annotated_lncRNA	XLOC_024066	XLOC_024066	0.992404	1.44322e-08
XR_001918701.1	106502534	INAFM2	Annotated_lncRNA	1485859	COX2	0.992833	1.14414e-08
XR_001918701.1	106502534	INAFM2	Annotated_lncRNA	1485861	ATP6	0.996349	7.74256e-10
TCONS_00034458	102179496	ZNF704	Novel_lncRNA	100860779	LALBA	0.977488	1.09361e-06
XR_001918520.1	108636718	LOC108636718	Annotated_lncRNA	102183480	LOC102183480	0.978794	8.62343e-07
XR_001918520.1	108636718	LOC108636718	Annotated_lncRNA	102174800	SLC2A1	0.975493	1.53226e-06
XR_001918520.1	108636718	LOC108636718	Annotated_lncRNA	102175634	LOC102175634	0.998968	4.96097e-12
XR_001918520.1	108636718	LOC108636718	Annotated_lncRNA	102187477	IL13	0.991211	2.58319e-08
XR_001918520.1	108636718	LOC108636718	Annotated_lncRNA	102186015	FBP1	0.995317	2.09297e-09
XR_001918520.1	108636718	LOC108636718	Annotated_lncRNA	106502554	DUOX2	0.993898	6.02009e-09
XR_001918520.1	108636718	LOC108636718	Annotated_lncRNA	102184911	DUOXA2	0.99837	3.07894e-11
XR_001918520.1	108636718	LOC108636718	Annotated_lncRNA	102185477	TGM2	0.98378	2.96943e-07
XR_001918520.1	108636718	LOC108636718	Annotated_lncRNA	102186320	LOC102186320	0.990864	3.01516e-08
XR_001918520.1	108636718	LOC108636718	Annotated_lncRNA	102179495	KCNB2	0.962845	7.97172e-06
XR_001918520.1	108636718	LOC108636718	Annotated_lncRNA	102186681	LOC102186681	0.991185	2.61395e-08
XR_001918520.1	108636718	LOC108636718	Annotated_lncRNA	102179132	LOC102179132	0.994501	3.97513e-09
XR_001918520.1	108636718	LOC108636718	Annotated_lncRNA	102175987	LOC102175987	0.992104	1.6843e-08
XR_001918520.1	108636718	LOC108636718	Annotated_lncRNA	102191571	NETO1	0.951667	2.25187e-05
XR_001918520.1	108636718	LOC108636718	Annotated_lncRNA	102173926	IL13RA2	0.990853	3.02963e-08
XR_001918520.1	108636718	LOC108636718	Annotated_lncRNA	102178702	DBX2	0.993136	9.63021e-09
XR_001295686.2	106502106	LOC106502106	Annotated_lncRNA	102178141	SFRP4	0.954724	1.74041e-05
XR_001295686.2	106502106	LOC106502106	Annotated_lncRNA	102188032	LOC102188032	0.956513	1.48452e-05
TCONS_00007287	XLOC_003247	XLOC_003247	Novel_lncRNA	XLOC_024066	XLOC_024066	1	5.38399e-62
TCONS_00007287	XLOC_003247	XLOC_003247	Novel_lncRNA	1485859	COX2	0.99964	7.32398e-14
TCONS_00007287	XLOC_003247	XLOC_003247	Novel_lncRNA	1485861	ATP6	0.999121	2.60597e-12
XR_001917985.1	102170937	LOC102170937	Annotated_lncRNA	102172204	LOC102172204	0.990777	3.1314e-08
XR_001917985.1	102170937	LOC102170937	Annotated_lncRNA	102181752	LOC102181752	0.979665	7.29964e-07
XR_001917985.1	102170937	LOC102170937	Annotated_lncRNA	102171764	LOC102171764	0.989899	4.49907e-08
XR_001917985.1	102170937	LOC102170937	Annotated_lncRNA	102175043	CA3	0.990821	3.07145e-08
XR_001917985.1	102170937	LOC102170937	Annotated_lncRNA	102171111	IL17F	0.987468	1.06289e-07
XR_001917985.1	102170937	LOC102170937	Annotated_lncRNA	102186564	NRK	0.958077	1.28457e-05
XR_001917985.1	102170937	LOC102170937	Annotated_lncRNA	108634962	LOC108634962	0.986206	1.55793e-07

## Sheet: Table S6
Table S6 GO functional enrichment analysis of co-DE mRNAs in anagen phase
Category	GOID	Description	GeneRatio	BgRatio	pvalue	padj	geneID	geneName	Count
BP	GO:0006487	protein N-linked glycosylation	5/43	11/5758	8.17113e-09	1.11127e-06	XLOC_001766/XLOC_001768/XLOC_019242/XLOC_029266/XLOC_029270	XLOC_001766/XLOC_001768/XLOC_019242/XLOC_029266/XLOC_029270	5
BP	GO:1901135	carbohydrate derivative metabolic process	9/43	128/5758	2.97819e-07	1.7613e-05	XLOC_001766/XLOC_001768/XLOC_017040/XLOC_019242/102191246/XLOC_029266/XLOC_029270/102182559/102179335	XLOC_001766/XLOC_001768/XLOC_017040/XLOC_019242/GPHN/XLOC_029266/XLOC_029270/ST6GALNAC5/ITIH1	9
BP	GO:0006486	protein glycosylation	6/43	45/5758	7.92683e-07	1.7613e-05	XLOC_001766/XLOC_001768/XLOC_019242/XLOC_029266/XLOC_029270/102182559	XLOC_001766/XLOC_001768/XLOC_019242/XLOC_029266/XLOC_029270/ST6GALNAC5	6
BP	GO:0009101	glycoprotein biosynthetic process	6/43	45/5758	7.92683e-07	1.7613e-05	XLOC_001766/XLOC_001768/XLOC_019242/XLOC_029266/XLOC_029270/102182559	XLOC_001766/XLOC_001768/XLOC_019242/XLOC_029266/XLOC_029270/ST6GALNAC5	6
BP	GO:0043413	macromolecule glycosylation	6/43	45/5758	7.92683e-07	1.7613e-05	XLOC_001766/XLOC_001768/XLOC_019242/XLOC_029266/XLOC_029270/102182559	XLOC_001766/XLOC_001768/XLOC_019242/XLOC_029266/XLOC_029270/ST6GALNAC5	6
BP	GO:0070085	glycosylation	6/43	45/5758	7.92683e-07	1.7613e-05	XLOC_001766/XLOC_001768/XLOC_019242/XLOC_029266/XLOC_029270/102182559	XLOC_001766/XLOC_001768/XLOC_019242/XLOC_029266/XLOC_029270/ST6GALNAC5	6
BP	GO:0009100	glycoprotein metabolic process	6/43	46/5758	9.06552e-07	1.7613e-05	XLOC_001766/XLOC_001768/XLOC_019242/XLOC_029266/XLOC_029270/102182559	XLOC_001766/XLOC_001768/XLOC_019242/XLOC_029266/XLOC_029270/ST6GALNAC5	6
BP	GO:0006629	lipid metabolic process	8/43	129/5758	3.83123e-06	6.51308e-05	XLOC_001766/XLOC_001768/XLOC_019242/102191138/XLOC_029270/102188148/XLOC_063489/100861212	XLOC_001766/XLOC_001768/XLOC_019242/PDSS2/XLOC_029270/PLCB1/XLOC_063489/LOC100861212	8
BP	GO:1901566	organonitrogen compound biosynthetic process	11/43	316/5758	1.35051e-05	0.000204077	XLOC_001766/XLOC_001768/XLOC_019242/102191246/XLOC_029266/XLOC_029270/XLOC_053136/102183387/102182559/102171417/102173098	XLOC_001766/XLOC_001768/XLOC_019242/GPHN/XLOC_029266/XLOC_029270/XLOC_053136/LOC102183387/ST6GALNAC5/LOC102171417/LOC102173098	11
BP	GO:1901137	carbohydrate derivative biosynthetic process	6/43	89/5758	4.43211e-05	0.000602767	XLOC_001766/XLOC_001768/XLOC_019242/XLOC_029266/XLOC_029270/102182559	XLOC_001766/XLOC_001768/XLOC_019242/XLOC_029266/XLOC_029270/ST6GALNAC5	6
BP	GO:0044255	cellular lipid metabolic process	5/43	65/5758	0.00010845	0.00134084	XLOC_001766/XLOC_001768/XLOC_019242/102191138/XLOC_029270	XLOC_001766/XLOC_001768/XLOC_019242/PDSS2/XLOC_029270	5
MF	GO:0005198	structural molecule activity	6/54	195/8705	0.00123537	0.107232	XLOC_017040/XLOC_054487/XLOC_063489/102183387/102171417/102173098	XLOC_017040/XLOC_054487/XLOC_063489/LOC102183387/LOC102171417/LOC102173098	6
MF	GO:0051087	chaperone binding	2/54	11/8705	0.00200433	0.107232	XLOC_038940/XLOC_046442	XLOC_038940/XLOC_046442	2
MF	GO:0016853	isomerase activity	3/54	57/8705	0.0052126	0.129188	XLOC_011953/XLOC_028393/102172665	XLOC_011953/XLOC_028393/CWC27	3
MF	GO:0034062	5'-3' RNA polymerase activity	2/54	19/8705	0.00603683	0.129188	XLOC_013256/XLOC_061297	XLOC_013256/XLOC_061297	2
MF	GO:0097747	RNA polymerase activity	2/54	19/8705	0.00603683	0.129188	XLOC_013256/XLOC_061297	XLOC_013256/XLOC_061297	2
CC	GO:0044444	cytoplasmic part	8/33	363/4137	0.00637449	0.14352	XLOC_017040/XLOC_038940/XLOC_062680/XLOC_063489/102183387/102171417/102173098/102185261	XLOC_017040/XLOC_038940/XLOC_062680/XLOC_063489/LOC102183387/LOC102171417/LOC102173098/TNNT2	8
BP	GO:0006996	organelle organization	5/43	173/5758	0.00882786	0.100049	102188466/XLOC_011953/XLOC_028393/XLOC_062680/XLOC_063489	WASL/XLOC_011953/XLOC_028393/XLOC_062680/XLOC_063489	5
CC	GO:0005886	plasma membrane	3/33	58/4137	0.0105905	0.14352	XLOC_015959/102169024/102182635	XLOC_015959/GPC5/CATSPERB	3
BP	GO:0016043	cellular component organization	6/43	260/5758	0.011959	0.125109	102188466/XLOC_011953/XLOC_015959/XLOC_028393/XLOC_062680/XLOC_063489	WASL/XLOC_011953/XLOC_015959/XLOC_028393/XLOC_062680/XLOC_063489	6
CC	GO:0071944	cell periphery	3/33	67/4137	0.0156628	0.14352	XLOC_015959/102169024/102182635	XLOC_015959/GPC5/CATSPERB	3
CC	GO:0043228	non-membrane-bounded organelle	8/33	428/4137	0.016656	0.14352	XLOC_017040/XLOC_029271/XLOC_063489/102183387/102171417/108634456/102173098/102185261	XLOC_017040/XLOC_029271/XLOC_063489/LOC102183387/LOC102171417/LOC108634456/LOC102173098/TNNT2	8
CC	GO:0043232	intracellular non-membrane-bounded organelle	8/33	428/4137	0.016656	0.14352	XLOC_017040/XLOC_029271/XLOC_063489/102183387/102171417/108634456/102173098/102185261	XLOC_017040/XLOC_029271/XLOC_063489/LOC102183387/LOC102171417/LOC108634456/LOC102173098/TNNT2	8
BP	GO:0006457	protein folding	2/43	27/5758	0.0169891	0.147086	XLOC_038940/XLOC_046442	XLOC_038940/XLOC_046442	2
BP	GO:0071840	cellular component organization or biogenesis	6/43	286/5758	0.01844	0.147086	102188466/XLOC_011953/XLOC_015959/XLOC_028393/XLOC_062680/XLOC_063489	WASL/XLOC_011953/XLOC_015959/XLOC_028393/XLOC_062680/XLOC_063489	6
CC	GO:0005737	cytoplasm	8/33	437/4137	0.0187146	0.14352	XLOC_017040/XLOC_038940/XLOC_062680/XLOC_063489/102183387/102171417/102173098/102185261	XLOC_017040/XLOC_038940/XLOC_062680/XLOC_063489/LOC102183387/LOC102171417/LOC102173098/TNNT2	8
BP	GO:0009144	purine nucleoside triphosphate metabolic process	2/43	29/5758	0.0194673	0.147086	XLOC_017040/102191246	XLOC_017040/GPHN	2
BP	GO:0009199	ribonucleoside triphosphate metabolic process	2/43	29/5758	0.0194673	0.147086	XLOC_017040/102191246	XLOC_017040/GPHN	2
BP	GO:0009205	purine ribonucleoside triphosphate metabolic process	2/43	29/5758	0.0194673	0.147086	XLOC_017040/102191246	XLOC_017040/GPHN	2
CC	GO:0044455	mitochondrial membrane part	2/33	28/4137	0.0204944	0.14352	XLOC_017040/XLOC_062680	XLOC_017040/XLOC_062680	2
MF	GO:0008081	phosphoric diester hydrolase activity	2/54	36/8705	0.0207968	0.366837	XLOC_029270/102188148	XLOC_029270/PLCB1	2
BP	GO:0009141	nucleoside triphosphate metabolic process	2/43	31/5758	0.0220878	0.158102	XLOC_017040/102191246	XLOC_017040/GPHN	2
BP	GO:0006732	coenzyme metabolic process	2/43	32/5758	0.02345	0.15946	102191246/XLOC_053136	GPHN/XLOC_053136	2
CC	GO:0005743	mitochondrial inner membrane	2/33	31/4137	0.0248399	0.14352	XLOC_017040/XLOC_062680	XLOC_017040/XLOC_062680	2
CC	GO:0019866	organelle inner membrane	2/33	31/4137	0.0248399	0.14352	XLOC_017040/XLOC_062680	XLOC_017040/XLOC_062680	2
MF	GO:0098772	molecular function regulator	6/54	376/8705	0.0280733	0.366837	XLOC_001766/XLOC_017040/XLOC_038940/XLOC_046442/102184378/102179335	XLOC_001766/XLOC_017040/XLOC_038940/XLOC_046442/MCF2L2/ITIH1	6
MF	GO:0140097	catalytic activity, acting on DNA	2/54	43/8705	0.0290002	0.366837	XLOC_011953/XLOC_028393	XLOC_011953/XLOC_028393	2
BP	GO:0051188	cofactor biosynthetic process	2/43	36/5758	0.029232	0.189312	102191246/XLOC_053136	GPHN/XLOC_053136	2
MF	GO:0060589	nucleoside-triphosphatase regulator activity	2/54	47/8705	0.0341768	0.366837	XLOC_038940/XLOC_046442	XLOC_038940/XLOC_046442	2
BP	GO:0007049	cell cycle	2/43	41/5758	0.0371685	0.20319	XLOC_029271/XLOC_063489	XLOC_029271/XLOC_063489	2
BP	GO:0071103	DNA conformation change	2/43	41/5758	0.0371685	0.20319	XLOC_011953/XLOC_028393	XLOC_011953/XLOC_028393	2
BP	GO:0009150	purine ribonucleotide metabolic process	2/43	42/5758	0.0388451	0.20319	XLOC_017040/102191246	XLOC_017040/GPHN	2
BP	GO:0009259	ribonucleotide metabolic process	2/43	42/5758	0.0388451	0.20319	XLOC_017040/102191246	XLOC_017040/GPHN	2
BP	GO:0051704	multi-organism process	2/43	42/5758	0.0388451	0.20319	XLOC_001766/XLOC_015959	XLOC_001766/XLOC_015959	2
BP	GO:0019693	ribose phosphate metabolic process	2/43	43/5758	0.0405502	0.204253	XLOC_017040/102191246	XLOC_017040/GPHN	2
MF	GO:0016779	nucleotidyltransferase activity	2/54	53/8705	0.0425566	0.366837	XLOC_013256/XLOC_061297	XLOC_013256/XLOC_061297	2
BP	GO:0006163	purine nucleotide metabolic process	2/43	46/5758	0.0458322	0.215999	XLOC_017040/102191246	XLOC_017040/GPHN	2
BP	GO:0006396	RNA processing	3/43	109/5758	0.0471339	0.215999	XLOC_001768/XLOC_017040/XLOC_029266	XLOC_001768/XLOC_017040/XLOC_029266	3
CC	GO:0031966	mitochondrial membrane	2/33	44/4137	0.0473983	0.229487	XLOC_017040/XLOC_062680	XLOC_017040/XLOC_062680	2
BP	GO:0072521	purine-containing compound metabolic process	2/43	47/5758	0.0476468	0.215999	XLOC_017040/102191246	XLOC_017040/GPHN	2
BP	GO:0044281	small molecule metabolic process	4/43	190/5758	0.0521366	0.226292	XLOC_017040/102191246/XLOC_053136/102179335	XLOC_017040/GPHN/XLOC_053136/ITIH1	4
BP	GO:0051186	cofactor metabolic process	2/43	50/5758	0.0532453	0.226292	102191246/XLOC_053136	GPHN/XLOC_053136	2
CC	GO:0005740	mitochondrial envelope	2/33	47/4137	0.0533705	0.229487	XLOC_017040/XLOC_062680	XLOC_017040/XLOC_062680	2
CC	GO:0044459	plasma membrane part	2/33	48/4137	0.0554185	0.229487	102169024/102182635	GPC5/CATSPERB	2
MF	GO:0030234	enzyme regulator activity	3/54	141/8705	0.0567181	0.366837	XLOC_038940/XLOC_046442/102179335	XLOC_038940/XLOC_046442/ITIH1	3
MF	GO:0004970	ionotropic glutamate receptor activity	1/54	10/8705	0.0603603	0.366837	102191614	GRIN3A	1
MF	GO:0008066	glutamate receptor activity	1/54	10/8705	0.0603603	0.366837	102191614	GRIN3A	1
MF	GO:0022824	transmitter-gated ion channel activity	1/54	10/8705	0.0603603	0.366837	102191614	GRIN3A	1
MF	GO:0022835	transmitter-gated channel activity	1/54	10/8705	0.0603603	0.366837	102191614	GRIN3A	1
MF	GO:0030594	neurotransmitter receptor activity	1/54	10/8705	0.0603603	0.366837	102191614	GRIN3A	1
MF	GO:0003735	structural constituent of ribosome	3/54	146/8705	0.0616862	0.366837	102183387/102171417/102173098	LOC102183387/LOC102171417/LOC102173098	3
BP	GO:0043604	amide biosynthetic process	4/43	202/5758	0.0626174	0.258059	XLOC_053136/102183387/102171417/102173098	XLOC_053136/LOC102183387/LOC102171417/LOC102173098	4
BP	GO:0007010	cytoskeleton organization	2/43	56/5758	0.0650982	0.260393	102188466/XLOC_063489	WASL/XLOC_063489	2
MF	GO:0008375	acetylglucosaminyltransferase activity	1/54	11/8705	0.0661959	0.366837	XLOC_029266	XLOC_029266	1
CC	GO:0031967	organelle envelope	2/33	54/4137	0.0682699	0.229487	XLOC_017040/XLOC_062680	XLOC_017040/XLOC_062680	2
CC	GO:0031975	envelope	2/33	54/4137	0.0682699	0.229487	XLOC_017040/XLOC_062680	XLOC_017040/XLOC_062680	2
BP	GO:0043603	cellular amide metabolic process	4/43	211/5758	0.071165	0.273031	XLOC_053136/102183387/102171417/102173098	XLOC_053136/LOC102183387/LOC102171417/LOC102173098	4
MF	GO:0004197	cysteine-type endopeptidase activity	1/54	12/8705	0.071996	0.366837	XLOC_038936	XLOC_038936	1
MF	GO:0004559	alpha-mannosidase activity	1/54	12/8705	0.071996	0.366837	106501835	LOC106501835	1
MF	GO:0015923	mannosidase activity	1/54	12/8705	0.071996	0.366837	106501835	LOC106501835	1
BP	GO:0006022	aminoglycan metabolic process	1/43	10/5758	0.072273	0.273031	102179335	ITIH1	1
CC	GO:0044429	mitochondrial part	2/33	56/4137	0.0727557	0.229487	XLOC_017040/XLOC_062680	XLOC_017040/XLOC_062680	2
CC	GO:0044446	intracellular organelle part	7/33	470/4137	0.0729858	0.229487	XLOC_017040/XLOC_029271/XLOC_038940/XLOC_062680/XLOC_063489/108634456/102185261	XLOC_017040/XLOC_029271/XLOC_038940/XLOC_062680/XLOC_063489/LOC108634456/TNNT2	7
CC	GO:0044422	organelle part	7/33	473/4137	0.0750246	0.229487	XLOC_017040/XLOC_029271/XLOC_038940/XLOC_062680/XLOC_063489/108634456/102185261	XLOC_017040/XLOC_029271/XLOC_038940/XLOC_062680/XLOC_063489/LOC108634456/TNNT2	7
MF	GO:0008373	sialyltransferase activity	1/54	13/8705	0.0777606	0.378199	102182559	ST6GALNAC5	1
CC	GO:0005856	cytoskeleton	3/33	130/4137	0.0835064	0.241241	XLOC_017040/XLOC_063489/102185261	XLOC_017040/XLOC_063489/TNNT2	3
BP	GO:0009116	nucleoside metabolic process	1/43	12/5758	0.0861027	0.274829	102191246	GPHN	1
BP	GO:0032504	multicellular organism reproduction	1/43	12/5758	0.0861027	0.274829	XLOC_015959	XLOC_015959	1
BP	GO:1901657	glycosyl compound metabolic process	1/43	12/5758	0.0861027	0.274829	102191246	GPHN	1
BP	GO:0050801	ion homeostasis	1/43	13/5758	0.0929418	0.274829	102175089	CUTC	1
BP	GO:0055065	metal ion homeostasis	1/43	13/5758	0.0929418	0.274829	102175089	CUTC	1
BP	GO:0055080	cation homeostasis	1/43	13/5758	0.0929418	0.274829	102175089	CUTC	1
BP	GO:0098771	inorganic ion homeostasis	1/43	13/5758	0.0929418	0.274829	102175089	CUTC	1
MF	GO:0016667	oxidoreductase activity, acting on a sulfur group of donors	1/54	16/8705	0.0948446	0.413472	102176235	MSRA	1
BP	GO:0009117	nucleotide metabolic process	2/43	70/5758	0.0956951	0.274829	XLOC_017040/102191246	XLOC_017040/GPHN	2
MF	GO:0046914	transition metal ion binding	5/54	395/8705	0.0969382	0.413472	XLOC_001766/102187134/102173013/102175089/102176075	XLOC_001766/ZCCHC7/FBXO11/CUTC/NR1I2	5
BP	GO:0007005	mitochondrion organization	1/43	14/5758	0.099731	0.274829	XLOC_062680	XLOC_062680	1
BP	GO:0019953	sexual reproduction	1/43	14/5758	0.099731	0.274829	XLOC_015959	XLOC_015959	1
BP	GO:0044703	multi-organism reproductive process	1/43	14/5758	0.099731	0.274829	XLOC_015959	XLOC_015959	1
BP	GO:0048878	chemical homeostasis	1/43	14/5758	0.099731	0.274829	102175089	CUTC	1
BP	GO:0006753	nucleoside phosphate metabolic process	2/43	72/5758	0.100355	0.274829	XLOC_017040/102191246	XLOC_017040/GPHN	2
MF	GO:0003755	peptidyl-prolyl cis-trans isomerase activity	1/54	17/8705	0.10047	0.413472	102172665	CWC27	1
MF	GO:0016859	cis-trans isomerase activity	1/54	17/8705	0.10047	0.413472	102172665	CWC27	1
BP	GO:0000226	microtubule cytoskeleton organization	1/43	15/5758	0.10647	0.274829	XLOC_063489	XLOC_063489	1
BP	GO:0000278	mitotic cell cycle	1/43	15/5758	0.10647	0.274829	XLOC_029271	XLOC_029271	1
CC	GO:0005840	ribosome	3/33	146/4137	0.108962	0.245592	102183387/102171417/102173098	LOC102183387/LOC102171417/LOC102173098	3
CC	GO:0005576	extracellular region	5/33	323/4137	0.110189	0.245592	XLOC_001766/XLOC_017040/100861231/100750242/100860784	XLOC_001766/XLOC_017040/CSN3/CSN1S1/CSN2	5
MF	GO:0140098	catalytic activity, acting on RNA	2/54	92/8705	0.111167	0.440549	XLOC_013256/XLOC_061297	XLOC_013256/XLOC_061297	2
BP	GO:0016042	lipid catabolic process	1/43	16/5758	0.113161	0.274829	102188148	PLCB1	1
BP	GO:0016053	organic acid biosynthetic process	1/43	16/5758	0.113161	0.274829	XLOC_053136	XLOC_053136	1
BP	GO:0046394	carboxylic acid biosynthetic process	1/43	16/5758	0.113161	0.274829	XLOC_053136	XLOC_053136	1
BP	GO:0061024	membrane organization	1/43	16/5758	0.113161	0.274829	XLOC_015959	XLOC_015959	1
CC	GO:0000775	chromosome, centromeric region	1/33	15/4137	0.113378	0.245592	XLOC_029271	XLOC_029271	1
CC	GO:0005739	mitochondrion	2/33	74/4137	0.116918	0.245592	XLOC_017040/XLOC_062680	XLOC_017040/XLOC_062680	2
BP	GO:0000413	protein peptidyl-prolyl isomerization	1/43	17/5758	0.119802	0.274829	102172665	CWC27	1
BP	GO:0018208	peptidyl-proline modification	1/43	17/5758	0.119802	0.274829	102172665	CWC27	1
CC	GO:0034702	ion channel complex	1/33	16/4137	0.120476	0.245592	102182635	CATSPERB	1
CC	GO:0034703	cation channel complex	1/33	16/4137	0.120476	0.245592	102182635	CATSPERB	1
CC	GO:0099023	tethering complex	1/33	16/4137	0.120476	0.245592	XLOC_038940	XLOC_038940	1
MF	GO:0005507	copper ion binding	1/54	21/8705	0.12263	0.452463	102175089	CUTC	1
MF	GO:0008194	UDP-glycosyltransferase activity	1/54	21/8705	0.12263	0.452463	XLOC_029266	XLOC_029266	1
BP	GO:0043414	macromolecule methylation	1/43	18/5758	0.126395	0.274829	XLOC_029266	XLOC_029266	1
CC	GO:0031090	organelle membrane	2/33	78/4137	0.127503	0.245592	XLOC_017040/XLOC_062680	XLOC_017040/XLOC_062680	2
CC	GO:0098687	chromosomal region	1/33	17/4137	0.127519	0.245592	XLOC_029271	XLOC_029271	1
BP	GO:0006082	organic acid metabolic process	2/43	85/5758	0.132068	0.274829	XLOC_053136/102179335	XLOC_053136/ITIH1	2
BP	GO:0019752	carboxylic acid metabolic process	2/43	85/5758	0.132068	0.274829	XLOC_053136/102179335	XLOC_053136/ITIH1	2
BP	GO:0043436	oxoacid metabolic process	2/43	85/5758	0.132068	0.274829	XLOC_053136/102179335	XLOC_053136/ITIH1	2
BP	GO:0055086	nucleobase-containing small molecule metabolic process	2/43	85/5758	0.132068	0.274829	XLOC_017040/102191246	XLOC_017040/GPHN	2
BP	GO:0051276	chromosome organization	2/43	86/5758	0.134597	0.274829	XLOC_011953/XLOC_028393	XLOC_011953/XLOC_028393	2
MF	GO:0016810	hydrolase activity, acting on carbon-nitrogen (but not peptide) bonds	1/54	24/8705	0.138898	0.48235	102171067	GDA	1
BP	GO:0006091	generation of precursor metabolites and energy	1/43	20/5758	0.139436	0.274829	XLOC_017040	XLOC_017040	1
BP	GO:0006887	exocytosis	1/43	20/5758	0.139436	0.274829	XLOC_015959	XLOC_015959	1
BP	GO:0007015	actin filament organization	1/43	20/5758	0.139436	0.274829	102188466	WASL	1
BP	GO:0044403	symbiont process	1/43	20/5758	0.139436	0.274829	XLOC_001766	XLOC_001766	1
BP	GO:0044419	interspecies interaction between organisms	1/43	20/5758	0.139436	0.274829	XLOC_001766	XLOC_001766	1
BP	GO:0097435	supramolecular fiber organization	1/43	20/5758	0.139436	0.274829	102188466	WASL	1
MF	GO:0004620	phospholipase activity	1/54	25/8705	0.144254	0.48235	102188148	PLCB1	1
MF	GO:0004867	serine-type endopeptidase inhibitor activity	1/54	25/8705	0.144254	0.48235	102179335	ITIH1	1
CC	GO:1990904	ribonucleoprotein complex	3/33	166/4137	0.144507	0.263123	102183387/102171417/102173098	LOC102183387/LOC102171417/LOC102173098	3
BP	GO:0032940	secretion by cell	1/43	21/5758	0.145885	0.283433	XLOC_015959	XLOC_015959	1
MF	GO:0016298	lipase activity	1/54	26/8705	0.149578	0.48499	102188148	PLCB1	1
BP	GO:0009966	regulation of signal transduction	2/43	93/5758	0.1526	0.287669	102169024/102184378	GPC5/MCF2L2	2
BP	GO:0010646	regulation of cell communication	2/43	93/5758	0.1526	0.287669	102169024/102184378	GPC5/MCF2L2	2
MF	GO:0046983	protein dimerization activity	3/54	219/8705	0.154109	0.48499	XLOC_038940/XLOC_046442/108634456	XLOC_038940/XLOC_046442/LOC108634456	3
CC	GO:0098800	inner mitochondrial membrane protein complex	1/33	21/4137	0.155148	0.263123	XLOC_017040	XLOC_017040	1
BP	GO:0023051	regulation of signaling	2/43	94/5758	0.155211	0.287669	102169024/102184378	GPC5/MCF2L2	2
BP	GO:0000003	reproduction	1/43	23/5758	0.158641	0.287669	XLOC_015959	XLOC_015959	1
BP	GO:0022414	reproductive process	1/43	23/5758	0.158641	0.287669	XLOC_015959	XLOC_015959	1
CC	GO:0031226	intrinsic component of plasma membrane	1/33	22/4137	0.161922	0.263123	102169024	GPC5	1
CC	GO:1902495	transmembrane transporter complex	1/33	22/4137	0.161922	0.263123	102182635	CATSPERB	1
CC	GO:1990351	transporter complex	1/33	22/4137	0.161922	0.263123	102182635	CATSPERB	1
BP	GO:0032259	methylation	1/43	24/5758	0.16495	0.295173	XLOC_029266	XLOC_029266	1
MF	GO:0042578	phosphoric ester hydrolase activity	2/54	118/8705	0.166034	0.507589	XLOC_029270/102188148	XLOC_029270/PLCB1	2
BP	GO:0035556	intracellular signal transduction	3/43	192/5758	0.171776	0.303397	102188148/102184378/102171162	PLCB1/MCF2L2/SOCS5	3
CC	GO:0044431	Golgi apparatus part	1/33	24/4137	0.175311	0.276248	XLOC_038940	XLOC_038940	1
BP	GO:0022402	cell cycle process	1/43	26/5758	0.177428	0.303927	XLOC_063489	XLOC_063489	1
BP	GO:0048583	regulation of response to stimulus	2/43	103/5758	0.179083	0.303927	102169024/102184378	GPC5/MCF2L2	2
BP	GO:0006412	translation	3/43	197/5758	0.181081	0.303927	102183387/102171417/102173098	LOC102183387/LOC102171417/LOC102173098	3
BP	GO:0043043	peptide biosynthetic process	3/43	199/5758	0.184842	0.303927	102183387/102171417/102173098	LOC102183387/LOC102171417/LOC102173098	3
BP	GO:0046034	ATP metabolic process	1/43	28/5758	0.189724	0.303927	XLOC_017040	XLOC_017040	1
BP	GO:0006518	peptide metabolic process	3/43	204/5758	0.19434	0.303927	102183387/102171417/102173098	LOC102183387/LOC102171417/LOC102173098	3
BP	GO:0006259	DNA metabolic process	2/43	109/5758	0.195309	0.303927	XLOC_011953/XLOC_028393	XLOC_011953/XLOC_028393	2
BP	GO:0009108	coenzyme biosynthetic process	1/43	29/5758	0.195805	0.303927	XLOC_053136	XLOC_053136	1
MF	GO:0016757	transferase activity, transferring glycosyl groups	2/54	132/8705	0.197262	0.586305	XLOC_029266/102182559	XLOC_029266/ST6GALNAC5	2
BP	GO:0009123	nucleoside monophosphate metabolic process	1/43	30/5758	0.201841	0.303927	XLOC_017040	XLOC_017040	1
BP	GO:0009126	purine nucleoside monophosphate metabolic process	1/43	30/5758	0.201841	0.303927	XLOC_017040	XLOC_017040	1
BP	GO:0009161	ribonucleoside monophosphate metabolic process	1/43	30/5758	0.201841	0.303927	XLOC_017040	XLOC_017040	1
BP	GO:0009167	purine ribonucleoside monophosphate metabolic process	1/43	30/5758	0.201841	0.303927	XLOC_017040	XLOC_017040	1
BP	GO:0006397	mRNA processing	1/43	31/5758	0.207833	0.303927	XLOC_017040	XLOC_017040	1
BP	GO:0009451	RNA modification	1/43	31/5758	0.207833	0.303927	XLOC_029266	XLOC_029266	1
BP	GO:0030029	actin filament-based process	1/43	31/5758	0.207833	0.303927	102188466	WASL	1
BP	GO:0030036	actin cytoskeleton organization	1/43	31/5758	0.207833	0.303927	102188466	WASL	1
CC	GO:0005794	Golgi apparatus	1/33	29/4137	0.207884	0.31794	XLOC_038940	XLOC_038940	1
BP	GO:0008610	lipid biosynthetic process	1/43	33/5758	0.219685	0.317842	102191138	PDSS2	1
BP	GO:0046903	secretion	1/43	34/5758	0.225545	0.322886	XLOC_015959	XLOC_015959	1
CC	GO:0015630	microtubule cytoskeleton	1/33	32/4137	0.226825	0.327636	XLOC_063489	XLOC_063489	1
CC	GO:0098798	mitochondrial protein complex	1/33	32/4137	0.226825	0.327636	XLOC_017040	XLOC_017040	1
BP	GO:0019637	organophosphate metabolic process	2/43	121/5758	0.228283	0.323401	XLOC_017040/102191246	XLOC_017040/GPHN	2
MF	GO:0008270	zinc ion binding	3/54	269/8705	0.232835	0.589886	102187134/102173013/102176075	ZCCHC7/FBXO11/NR1I2	3
CC	GO:0044430	cytoskeletal part	2/33	116/4137	0.236216	0.331979	XLOC_063489/102185261	XLOC_063489/TNNT2	2
MF	GO:0005230	extracellular ligand-gated ion channel activity	1/54	44/8705	0.240031	0.589886	102191614	GRIN3A	1
MF	GO:0005088	Ras guanyl-nucleotide exchange factor activity	1/54	45/8705	0.244769	0.589886	102184378	MCF2L2	1
MF	GO:0005089	Rho guanyl-nucleotide exchange factor activity	1/54	45/8705	0.244769	0.589886	102184378	MCF2L2	1
BP	GO:0016071	mRNA metabolic process	1/43	38/5758	0.248562	0.344943	XLOC_017040	XLOC_017040	1
BP	GO:0044283	small molecule biosynthetic process	1/43	38/5758	0.248562	0.344943	XLOC_053136	XLOC_053136	1
MF	GO:0004553	hydrolase activity, hydrolyzing O-glycosyl compounds	1/54	47/8705	0.254159	0.589886	106501835	LOC106501835	1
MF	GO:0015276	ligand-gated ion channel activity	1/54	47/8705	0.254159	0.589886	102191614	GRIN3A	1
MF	GO:0022834	ligand-gated channel activity	1/54	47/8705	0.254159	0.589886	102191614	GRIN3A	1
BP	GO:0017144	drug metabolic process	1/43	40/5758	0.259818	0.356922	XLOC_017040	XLOC_017040	1
BP	GO:0018193	peptidyl-amino acid modification	1/43	41/5758	0.265385	0.360923	102172665	CWC27	1
CC	GO:0098796	membrane protein complex	2/33	127/4137	0.269061	0.368188	XLOC_017040/102182635	XLOC_017040/CATSPERB	2
MF	GO:0004866	endopeptidase inhibitor activity	1/54	51/8705	0.272596	0.589886	102179335	ITIH1	1
MF	GO:0061135	endopeptidase regulator activity	1/54	51/8705	0.272596	0.589886	102179335	ITIH1	1
MF	GO:0003723	RNA binding	2/54	168/8705	0.279912	0.589886	XLOC_013256/XLOC_061297	XLOC_013256/XLOC_061297	2
MF	GO:0017048	Rho GTPase binding	1/54	53/8705	0.281646	0.589886	102184378	MCF2L2	1
CC	GO:0098797	plasma membrane protein complex	1/33	42/4137	0.286843	0.382457	102182635	CATSPERB	1
BP	GO:0007266	Rho protein signal transduction	1/43	45/5758	0.287244	0.382992	102184378	MCF2L2	1
BP	GO:0035023	regulation of Rho protein signal transduction	1/43	45/5758	0.287244	0.382992	102184378	MCF2L2	1
MF	GO:0003779	actin binding	1/54	56/8705	0.295014	0.589886	102188466	WASL	1
CC	GO:0044427	chromosomal part	2/33	136/4137	0.295986	0.38316	XLOC_029271/108634456	XLOC_029271/LOC108634456	2
MF	GO:0016798	hydrolase activity, acting on glycosyl bonds	1/54	57/8705	0.299416	0.589886	106501835	LOC106501835	1
MF	GO:0005179	hormone activity	1/54	58/8705	0.30379	0.589886	XLOC_017040	XLOC_017040	1
MF	GO:0015399	primary active transmembrane transporter activity	1/54	58/8705	0.30379	0.589886	108637248	LOC108637248	1
MF	GO:0015405	P-P-bond-hydrolysis-driven transmembrane transporter activity	1/54	58/8705	0.30379	0.589886	108637248	LOC108637248	1
MF	GO:0042626	ATPase activity, coupled to transmembrane movement of substances	1/54	58/8705	0.30379	0.589886	108637248	LOC108637248	1
MF	GO:0043492	ATPase activity, coupled to movement of substances	1/54	58/8705	0.30379	0.589886	108637248	LOC108637248	1
BP	GO:0042592	homeostatic process	1/43	50/5758	0.313676	0.414173	102175089	CUTC	1
MF	GO:0030414	peptidase inhibitor activity	1/54	61/8705	0.316754	0.589886	102179335	ITIH1	1
MF	GO:0061134	peptidase regulator activity	1/54	61/8705	0.316754	0.589886	102179335	ITIH1	1
CC	GO:0015629	actin cytoskeleton	1/33	48/4137	0.320658	0.38316	102185261	TNNT2	1
MF	GO:0008168	methyltransferase activity	1/54	62/8705	0.321022	0.589886	XLOC_029266	XLOC_029266	1
MF	GO:0022836	gated channel activity	1/54	63/8705	0.325264	0.589886	102191614	GRIN3A	1
MF	GO:0022839	ion gated channel activity	1/54	63/8705	0.325264	0.589886	102191614	GRIN3A	1
CC	GO:0005694	chromosome	2/33	147/4137	0.328755	0.38316	XLOC_029271/108634456	XLOC_029271/LOC108634456	2
BP	GO:0007265	Ras protein signal transduction	1/43	53/5758	0.329072	0.426227	102184378	MCF2L2	1
BP	GO:0046578	regulation of Ras protein signal transduction	1/43	53/5758	0.329072	0.426227	102184378	MCF2L2	1
CC	GO:0099080	supramolecular complex	1/33	50/4137	0.33158	0.38316	102185261	TNNT2	1
CC	GO:0099081	supramolecular polymer	1/33	50/4137	0.33158	0.38316	102185261	TNNT2	1
CC	GO:0099512	supramolecular fiber	1/33	50/4137	0.33158	0.38316	102185261	TNNT2	1
MF	GO:0017016	Ras GTPase binding	1/54	66/8705	0.337835	0.592596	102184378	MCF2L2	1
MF	GO:0031267	small GTPase binding	1/54	66/8705	0.337835	0.592596	102184378	MCF2L2	1
MF	GO:0005085	guanyl-nucleotide exchange factor activity	1/54	68/8705	0.346088	0.594744	102184378	MCF2L2	1
MF	GO:0016741	transferase activity, transferring one-carbon groups	1/54	69/8705	0.350176	0.594744	XLOC_029266	XLOC_029266	1
MF	GO:0042623	ATPase activity, coupled	1/54	73/8705	0.36628	0.601911	108637248	LOC108637248	1
MF	GO:0016758	transferase activity, transferring hexosyl groups	1/54	75/8705	0.374185	0.601911	XLOC_029266	XLOC_029266	1
MF	GO:0016788	hydrolase activity, acting on ester bonds	2/54	211/8705	0.377978	0.601911	XLOC_029270/102188148	XLOC_029270/PLCB1	2
BP	GO:0051056	regulation of small GTPase mediated signal transduction	1/43	63/5758	0.377998	0.484979	102184378	MCF2L2	1
MF	GO:0004857	enzyme inhibitor activity	1/54	76/8705	0.378101	0.601911	102179335	ITIH1	1
MF	GO:0016491	oxidoreductase activity	3/54	357/8705	0.382523	0.601911	102176235/XLOC_053136/102178048	MSRA/XLOC_053136/NOX1	3
MF	GO:0032561	guanyl ribonucleotide binding	2/54	218/8705	0.393517	0.610237	XLOC_019581/102185346	XLOC_019581/ARL13A	2
BP	GO:1902531	regulation of intracellular signal transduction	1/43	68/5758	0.401136	0.509855	102184378	MCF2L2	1
MF	GO:0022804	active transmembrane transporter activity	1/54	83/8705	0.404846	0.618837	108637248	LOC108637248	1
MF	GO:0019001	guanyl nucleotide binding	2/54	227/8705	0.413248	0.622782	XLOC_019581/102185346	XLOC_019581/ARL13A	2
BP	GO:0007017	microtubule-based process	1/43	72/5758	0.419039	0.527679	XLOC_063489	XLOC_063489	1
MF	GO:0051020	GTPase binding	1/54	89/8705	0.42687	0.631052	102184378	MCF2L2	1
MF	GO:0003700	DNA-binding transcription factor activity	2/54	235/8705	0.430531	0.631052	102176075/102171520	NR1I2/FOS	2
BP	GO:0090407	organophosphate biosynthetic process	1/43	76/5758	0.43642	0.544523	102191246	GPHN	1
MF	GO:0005506	iron ion binding	1/54	93/8705	0.441106	0.637816	XLOC_001766	XLOC_001766	1
BP	GO:0007264	small GTPase mediated signal transduction	1/43	79/5758	0.44912	0.555276	102184378	MCF2L2	1
BP	GO:0006886	intracellular protein transport	1/43	80/5758	0.453291	0.555384	XLOC_038940	XLOC_038940	1
MF	GO:0008234	cysteine-type peptidase activity	1/54	102/8705	0.471881	0.664358	XLOC_038936	XLOC_038936	1
MF	GO:0016887	ATPase activity	1/54	102/8705	0.471881	0.664358	108637248	LOC108637248	1
MF	GO:0019899	enzyme binding	1/54	104/8705	0.47849	0.664915	102184378	MCF2L2	1
BP	GO:0034613	cellular protein localization	1/43	87/5758	0.481638	0.574585	XLOC_038940	XLOC_038940	1
BP	GO:0065008	regulation of biological quality	1/43	87/5758	0.481638	0.574585	102175089	CUTC	1
BP	GO:0070727	cellular macromolecule localization	1/43	87/5758	0.481638	0.574585	XLOC_038940	XLOC_038940	1
BP	GO:0055114	oxidation-reduction process	3/43	348/5758	0.486481	0.575316	XLOC_017040/102176235/102178048	XLOC_017040/MSRA/NOX1	3
MF	GO:0005509	calcium ion binding	2/54	264/8705	0.490893	0.669963	102188148/106501835	PLCB1/LOC106501835	2
BP	GO:0016192	vesicle-mediated transport	1/43	90/5758	0.493342	0.578401	XLOC_015959	XLOC_015959	1
MF	GO:0043565	sequence-specific DNA binding	1/54	110/8705	0.497835	0.669963	102176075	NR1I2	1
MF	GO:0140110	transcription regulator activity	2/54	269/8705	0.500907	0.669963	102176075/102171520	NR1I2/FOS	2
BP	GO:0015031	protein transport	1/43	94/5758	0.508547	0.583357	XLOC_038940	XLOC_038940	1
BP	GO:0015833	peptide transport	1/43	94/5758	0.508547	0.583357	XLOC_038940	XLOC_038940	1
BP	GO:0045184	establishment of protein localization	1/43	95/5758	0.512278	0.583357	XLOC_038940	XLOC_038940	1
MF	GO:0046982	protein heterodimerization activity	1/54	115/8705	0.513417	0.678217	108634456	LOC108634456	1
BP	GO:0046907	intracellular transport	1/43	96/5758	0.515981	0.583357	XLOC_038940	XLOC_038940	1
BP	GO:0042886	amide transport	1/43	97/5758	0.519657	0.583357	XLOC_038940	XLOC_038940	1
BP	GO:0051649	establishment of localization in cell	1/43	98/5758	0.523306	0.583357	XLOC_038940	XLOC_038940	1
BP	GO:0008104	protein localization	1/43	100/5758	0.530522	0.586593	XLOC_038940	XLOC_038940	1
MF	GO:0008092	cytoskeletal protein binding	1/54	122/8705	0.534436	0.697374	102188466	WASL	1
CC	GO:0000786	nucleosome	1/33	100/4137	0.555434	0.593297	108634456	LOC108634456	1
CC	GO:0012505	endomembrane system	1/33	100/4137	0.555434	0.593297	XLOC_038940	XLOC_038940	1
CC	GO:0032993	protein-DNA complex	1/33	101/4137	0.559068	0.593297	108634456	LOC108634456	1
CC	GO:0044815	DNA packaging complex	1/33	101/4137	0.559068	0.593297	108634456	LOC108634456	1
BP	GO:0022610	biological adhesion	1/43	111/5758	0.568344	0.616998	XLOC_001766	XLOC_001766	1
BP	GO:1901575	organic substance catabolic process	1/43	111/5758	0.568344	0.616998	102188148	PLCB1	1
BP	GO:0071705	nitrogen compound transport	1/43	112/5758	0.571631	0.616998	XLOC_038940	XLOC_038940	1
CC	GO:0000785	chromatin	1/33	106/4137	0.576811	0.598634	108634456	LOC108634456	1
BP	GO:0032501	multicellular organismal process	1/43	115/5758	0.581345	0.622543	XLOC_015959	XLOC_015959	1
CC	GO:1902494	catalytic complex	1/33	109/4137	0.587122	0.598634	XLOC_017040	XLOC_017040	1
BP	GO:0051641	cellular localization	1/43	117/5758	0.587702	0.624433	XLOC_038940	XLOC_038940	1
MF	GO:0005216	ion channel activity	1/54	142/8705	0.589703	0.751169	102191614	GRIN3A	1
MF	GO:0022838	substrate-specific channel activity	1/54	142/8705	0.589703	0.751169	102191614	GRIN3A	1
BP	GO:0009056	catabolic process	1/43	120/5758	0.597061	0.629459	102188148	PLCB1	1
MF	GO:0015267	channel activity	1/54	154/8705	0.619716	0.771042	102191614	GRIN3A	1
MF	GO:0022803	passive transmembrane transporter activity	1/54	154/8705	0.619716	0.771042	102191614	GRIN3A	1
BP	GO:0022607	cellular component assembly	1/43	136/5758	0.643574	0.673278	XLOC_063489	XLOC_063489	1
MF	GO:0030545	receptor regulator activity	1/54	166/8705	0.647571	0.787388	XLOC_017040	XLOC_017040	1
MF	GO:0048018	receptor ligand activity	1/54	166/8705	0.647571	0.787388	XLOC_017040	XLOC_017040	1
BP	GO:0033036	macromolecule localization	1/43	141/5758	0.657003	0.682079	XLOC_038940	XLOC_038940	1
BP	GO:0071702	organic substance transport	1/43	150/5758	0.67994	0.700544	XLOC_038940	XLOC_038940	1
BP	GO:0044085	cellular component biogenesis	1/43	162/5758	0.708205	0.724179	XLOC_063489	XLOC_063489	1
MF	GO:0022857	transmembrane transporter activity	2/54	411/8705	0.731104	0.84947	108637248/102191614	LOC108637248/GRIN3A	2
MF	GO:0001883	purine nucleoside binding	1/54	217/8705	0.745233	0.84947	102185346	ARL13A	1
MF	GO:0005525	GTP binding	1/54	217/8705	0.745233	0.84947	102185346	ARL13A	1
MF	GO:0032549	ribonucleoside binding	1/54	217/8705	0.745233	0.84947	102185346	ARL13A	1
MF	GO:0032550	purine ribonucleoside binding	1/54	217/8705	0.745233	0.84947	102185346	ARL13A	1
MF	GO:0001882	nucleoside binding	1/54	218/8705	0.746854	0.84947	102185346	ARL13A	1
MF	GO:0015318	inorganic molecular entity transmembrane transporter activity	1/54	223/8705	0.754807	0.84947	102191614	GRIN3A	1
MF	GO:0005215	transporter activity	2/54	437/8705	0.762141	0.84947	108637248/102191614	LOC108637248/GRIN3A	2
MF	GO:0015075	ion transmembrane transporter activity	1/54	248/8705	0.791039	0.868166	102191614	GRIN3A	1
MF	GO:0016772	transferase activity, transferring phosphorus-containing groups	2/54	468/8705	0.795143	0.868166	XLOC_013256/XLOC_061297	XLOC_013256/XLOC_061297	2
MF	GO:0005102	signaling receptor binding	1/54	272/8705	0.820854	0.887186	XLOC_017040	XLOC_017040	1
CC	GO:0005634	nucleus	2/33	392/4137	0.834378	0.834378	XLOC_029271/102176075	XLOC_029271/NR1I2	2
MF	GO:0004175	endopeptidase activity	1/54	285/8705	0.835217	0.893682	XLOC_038936	XLOC_038936	1
MF	GO:0004930	G-protein-coupled receptor activity	1/54	306/8705	0.856066	0.906921	102177727	LOC102177727	1
MF	GO:0017111	nucleoside-triphosphatase activity	1/54	356/8705	0.895843	0.92213	108637248	LOC108637248	1
MF	GO:0016462	pyrophosphatase activity	1/54	362/8705	0.899821	0.92213	108637248	LOC108637248	1
MF	GO:0016818	hydrolase activity, acting on acid anhydrides, in phosphorus-containing anhydrides	1/54	365/8705	0.901754	0.92213	108637248	LOC108637248	1
MF	GO:0016817	hydrolase activity, acting on acid anhydrides	1/54	370/8705	0.904894	0.92213	108637248	LOC108637248	1
MF	GO:0070011	peptidase activity, acting on L-amino acid peptides	1/54	427/8705	0.934422	0.938979	XLOC_038936	XLOC_038936	1
BP	GO:0016310	phosphorylation	1/43	354/5758	0.935346	0.949307	XLOC_017040	XLOC_017040	1
MF	GO:0008233	peptidase activity	1/54	438/8705	0.938979	0.938979	XLOC_038936	XLOC_038936	1
BP	GO:0055085	transmembrane transport	1/43	386/5758	0.949968	0.957005	108637248	LOC108637248	1
BP	GO:0006508	proteolysis	1/43	437/5758	0.966856	0.966856	XLOC_038936	XLOC_038936	1

## Sheet: Table S7
Table S7 GO functional enrichment analysis of co-DE mRNAs in catagen phase
Category	GOID	Description	GeneRatio	BgRatio	pvalue	padj	geneID	geneName	Count
MF	GO:0005125	cytokine activity	3/4	47/8677	8.19e-06	0.000147332	102178438/102182683/102182235	CXCL8/LOC102182683/IL36B	3			3/4
BP	GO:0006955	immune response	3/4	108/5727	2.57e-05	7.57e-05	102178438/102182683/102182235	CXCL8/LOC102182683/IL36B	3			3/4
BP	GO:0002376	immune system process	3/4	114/5727	3.03e-05	7.57e-05	102178438/102182683/102182235	CXCL8/LOC102182683/IL36B	3			3/4
MF	GO:0098772	molecular function regulator	4/4	371/8677	0.000200756	0.000890351	102178438/102182683/102182235/102184551	CXCL8/LOC102182683/IL36B/LOC102184551	4			4/4
MF	GO:0008009	chemokine activity	2/4	27/8677	0.000258105	0.000890351	102178438/102182683	CXCL8/LOC102182683	2			2/4
MF	GO:0042379	chemokine receptor binding	2/6	27/8677	0.000258105	0.000890351	102178438/102182683	CXCL8/LOC102182683	2			2/6
MF	GO:0001664	G protein-coupled receptor binding	2/6	30/8677	0.000319431	0.000890351	102178438/102182683	CXCL8/LOC102182683	2			2/6
MF	GO:0030545	receptor regulator activity	3/6	164/8677	0.000346248	0.000890351	102178438/102182683/102182235	CXCL8/LOC102182683/IL36B	3			3/6
MF	GO:0048018	receptor ligand activity	3/8	164/8677	0.000346248	0.000890351	102178438/102182683/102182235	CXCL8/LOC102182683/IL36B	3			3/8
CC	GO:0005576	extracellular region	4/8	320/4114	0.000475365	0.0014261	102178438/102182683/102182235/102184551	CXCL8/LOC102182683/IL36B/LOC102184551	4			4/8
MF	GO:0005102	signaling receptor binding	3/8	270/8677	0.00148564	0.0033427	102178438/102182683/102182235	CXCL8/LOC102182683/IL36B	3			3/8
MF	GO:0005126	cytokine receptor binding	2/8	107/8677	0.0040188	0.0080376	102178438/102182683	CXCL8/LOC102182683	2			2/8
MF	GO:0005044	scavenger receptor activity	1/8	39/8677	0.0354106	0.0579446	102183317	LOC102183317	1			1/8
MF	GO:0038024	cargo receptor activity	1/8	39/8677	0.0354106	0.0579446	102183317	LOC102183317	1			1/8
CC	GO:0005615	extracellular space	1/8	36/4114	0.0513989	0.0721552	102182235	IL36B	1			1/8
BP	GO:0006952	defense response	1/8	78/5727	0.0533896	0.0889826	102182235	IL36B	1			1/8
MF	GO:0004857	enzyme inhibitor activity	1/8	76/8677	0.0679861	0.101979	102184551	LOC102184551	1			1/8
CC	GO:0044421	extracellular region part	1/8	51/4114	0.0721552	0.0721552	102182235	IL36B	1			1/8
MF	GO:0020037	heme binding	1/8	107/8677	0.0945337	0.124801	102175045	HBBC	1			1/8
MF	GO:0046906	tetrapyrrole binding	1/8	110/8677	0.0970674	0.124801	102175045	HBBC	1			1/8
BP	GO:0006950	response to stress	1/8	160/5727	0.107182	0.133977	102182235	IL36B	1			1/8
MF	GO:0030234	enzyme regulator activity	1/8	139/8677	0.121241	0.14549	102184551	LOC102184551	1			1/8
MF	GO:0048037	cofactor binding	1/8	242/8677	0.202586	0.22791	102175045	HBBC	1			1/8
BP	GO:0055085	transmembrane transport	1/8	386/5727	0.243605	0.243605	108633279	LOC108633279	1			1/8
MF	GO:0022857	transmembrane transporter activity	1/8	411/8677	0.321833	0.338718	108633279	LOC108633279	1			1/8
MF	GO:0005215	transporter activity	1/8	437/8677	0.338718	0.338718	108633279	LOC108633279	1			1/8

## Sheet: Table S8
Table S8 GO functional enrichment analysis of co-DE mRNAs in telogen phase
Category	GOID	Description	GeneRatio	BgRatio	pvalue	padj	geneID	geneName	Count
CC	GO:0005576	extracellular region	7/11	319/4115	3.96828e-06	0.000166668	102169419/102181752/102171111/100750242/100860784/100861229/100861231	WNT9B/LOC102181752/IL17F/CSN1S1/CSN2/CSN1S2/CSN3	7
CC	GO:0098797	plasma membrane protein complex	2/11	41/4115	0.00503323	0.0920839	102179495/XLOC_024066	KCNB2/XLOC_024066	2
CC	GO:0044459	plasma membrane part	2/11	47/4115	0.00657742	0.0920839	102179495/XLOC_024066	KCNB2/XLOC_024066	2
CC	GO:0005886	plasma membrane	2/11	56/4115	0.00924795	0.0949561	102179495/XLOC_024066	KCNB2/XLOC_024066	2
BP	GO:0015031	protein transport	2/10	92/5730	0.010553	0.0761752	102184911/XLOC_024066	DUOXA2/XLOC_024066	2
BP	GO:0015833	peptide transport	2/10	92/5730	0.010553	0.0761752	102184911/XLOC_024066	DUOXA2/XLOC_024066	2
BP	GO:0045184	establishment of protein localization	2/10	93/5730	0.0107749	0.0761752	102184911/XLOC_024066	DUOXA2/XLOC_024066	2
BP	GO:0042886	amide transport	2/10	94/5730	0.0109989	0.0761752	102184911/XLOC_024066	DUOXA2/XLOC_024066	2
BP	GO:0008104	protein localization	2/10	98/5730	0.0119156	0.0761752	102184911/XLOC_024066	DUOXA2/XLOC_024066	2
CC	GO:0071944	cell periphery	2/11	65/4115	0.0123277	0.0949561	102179495/XLOC_024066	KCNB2/XLOC_024066	2
BP	GO:0071705	nitrogen compound transport	2/10	109/5730	0.0146054	0.0761752	102184911/XLOC_024066	DUOXA2/XLOC_024066	2
BP	GO:0032501	multicellular organismal process	2/10	113/5730	0.0156437	0.0761752	102169419/XLOC_024066	WNT9B/XLOC_024066	2
BP	GO:0019068	virion assembly	1/10	11/5730	0.019047	0.0761752	XLOC_024066	XLOC_024066	1
BP	GO:0055114	oxidation-reduction process	3/10	347/5730	0.0192023	0.0761752	106502554/102179132/102172204	DUOX2/LOC102179132/LOC102172204	3
MF	GO:0005244	voltage-gated ion channel activity	1/17	10/8677	0.0194302	0.191866	102179495	KCNB2	1
MF	GO:0005267	potassium channel activity	1/17	10/8677	0.0194302	0.191866	102179495	KCNB2	1
MF	GO:0022832	voltage-gated channel activity	1/17	10/8677	0.0194302	0.191866	102179495	KCNB2	1
BP	GO:0019058	viral life cycle	1/10	12/5730	0.0207623	0.0761752	XLOC_024066	XLOC_024066	1
MF	GO:0015079	potassium ion transmembrane transporter activity	1/17	11/8677	0.0213535	0.191866	102179495	KCNB2	1
BP	GO:0033036	macromolecule localization	2/10	139/5730	0.0231422	0.0761752	102184911/XLOC_024066	DUOXA2/XLOC_024066	2
BP	GO:0006979	response to oxidative stress	1/10	14/5730	0.0241847	0.0761752	106502554	DUOX2	1
MF	GO:0004601	peroxidase activity	1/17	13/8677	0.0251896	0.191866	106502554	DUOX2	1
BP	GO:0071702	organic substance transport	2/10	148/5730	0.0260281	0.0761752	102184911/XLOC_024066	DUOXA2/XLOC_024066	2
CC	GO:0012505	endomembrane system	2/11	97/4115	0.0263363	0.0949561	102184911/XLOC_024066	DUOXA2/XLOC_024066	2
CC	GO:0030133	transport vesicle	1/11	10/4115	0.0264408	0.0949561	XLOC_024066	XLOC_024066	1
BP	GO:0006813	potassium ion transport	1/10	16/5730	0.0275964	0.0761752	102179495	KCNB2	1
BP	GO:0016055	Wnt signaling pathway	1/10	16/5730	0.0275964	0.0761752	102169419	WNT9B	1
BP	GO:0198738	cell-cell signaling by wnt	1/10	16/5730	0.0275964	0.0761752	102169419	WNT9B	1
BP	GO:1905114	cell surface receptor signaling pathway involved in cell-cell signaling	1/10	16/5730	0.0275964	0.0761752	102169419	WNT9B	1
BP	GO:0016032	viral process	1/10	17/5730	0.0292981	0.0761752	XLOC_024066	XLOC_024066	1
BP	GO:0044403	symbiont process	1/10	17/5730	0.0292981	0.0761752	XLOC_024066	XLOC_024066	1
BP	GO:0044419	interspecies interaction between organisms	1/10	17/5730	0.0292981	0.0761752	XLOC_024066	XLOC_024066	1
MF	GO:0016491	oxidoreductase activity	3/17	356/8677	0.0303624	0.191866	106502554/102179132/102172204	DUOX2/LOC102179132/LOC102172204	3
CC	GO:0005798	Golgi-associated vesicle	1/11	12/4115	0.031652	0.0949561	XLOC_024066	XLOC_024066	1
CC	GO:0012506	vesicle membrane	1/11	12/4115	0.031652	0.0949561	XLOC_024066	XLOC_024066	1
CC	GO:0030120	vesicle coat	1/11	12/4115	0.031652	0.0949561	XLOC_024066	XLOC_024066	1
CC	GO:0030135	coated vesicle	1/11	12/4115	0.031652	0.0949561	XLOC_024066	XLOC_024066	1
CC	GO:0030659	cytoplasmic vesicle membrane	1/11	12/4115	0.031652	0.0949561	XLOC_024066	XLOC_024066	1
CC	GO:0030660	Golgi-associated vesicle membrane	1/11	12/4115	0.031652	0.0949561	XLOC_024066	XLOC_024066	1
CC	GO:0030662	coated vesicle membrane	1/11	12/4115	0.031652	0.0949561	XLOC_024066	XLOC_024066	1
BP	GO:0007267	cell-cell signaling	1/10	20/5730	0.0343874	0.0851499	102169419	WNT9B	1
MF	GO:0016209	antioxidant activity	1/17	18/8677	0.0347179	0.191866	106502554	DUOX2	1
MF	GO:0016684	oxidoreductase activity, acting on peroxide as acceptor	1/17	18/8677	0.0347179	0.191866	106502554	DUOX2	1
MF	GO:0016702	oxidoreductase activity, acting on single donors with incorporation of molecular oxygen, incorporation of two atoms of oxygen	1/17	18/8677	0.0347179	0.191866	102179132	LOC102179132	1
MF	GO:0016701	oxidoreductase activity, acting on single donors with incorporation of molecular oxygen	1/17	19/8677	0.036613	0.191866	102179132	LOC102179132	1
MF	GO:0051213	dioxygenase activity	1/17	20/8677	0.0385046	0.191866	102179132	LOC102179132	1
MF	GO:0005507	copper ion binding	1/17	21/8677	0.0403928	0.191866	102172204	LOC102172204	1
CC	GO:0098796	membrane protein complex	2/11	124/4115	0.0414702	0.0973676	102179495/XLOC_024066	KCNB2/XLOC_024066	2
CC	GO:0034702	ion channel complex	1/11	16/4115	0.0419985	0.0973676	102179495	KCNB2	1
CC	GO:0034703	cation channel complex	1/11	16/4115	0.0419985	0.0973676	102179495	KCNB2	1
BP	GO:0007600	sensory perception	1/10	25/5730	0.0428163	0.096802	XLOC_024066	XLOC_024066	1
BP	GO:0050877	nervous system process	1/10	25/5730	0.0428163	0.096802	XLOC_024066	XLOC_024066	1
CC	GO:0044433	cytoplasmic vesicle part	1/11	17/4115	0.0445694	0.0973676	XLOC_024066	XLOC_024066	1
CC	GO:0005887	integral component of plasma membrane	1/11	18/4115	0.047134	0.0973676	102179495	KCNB2	1
BP	GO:0003008	system process	1/10	30/5730	0.0511788	0.110887	XLOC_024066	XLOC_024066	1
BP	GO:0051260	protein homooligomerization	1/10	32/5730	0.0545054	0.113371	102179495	KCNB2	1
CC	GO:0031226	intrinsic component of plasma membrane	1/11	21/4115	0.0547903	0.0973676	102179495	KCNB2	1
CC	GO:1902495	transmembrane transporter complex	1/11	21/4115	0.0547903	0.0973676	102179495	KCNB2	1
CC	GO:1990351	transporter complex	1/11	21/4115	0.0547903	0.0973676	102179495	KCNB2	1
MF	GO:0005261	cation channel activity	1/17	31/8677	0.059083	0.259056	102179495	KCNB2	1
CC	GO:0030117	membrane coat	1/11	23/4115	0.0598634	0.0973676	XLOC_024066	XLOC_024066	1
CC	GO:0044431	Golgi apparatus part	1/11	23/4115	0.0598634	0.0973676	XLOC_024066	XLOC_024066	1
CC	GO:0048475	coated membrane	1/11	23/4115	0.0598634	0.0973676	XLOC_024066	XLOC_024066	1
BP	GO:0051704	multi-organism process	1/10	37/5730	0.0627759	0.125552	XLOC_024066	XLOC_024066	1
CC	GO:0031410	cytoplasmic vesicle	1/11	25/4115	0.0649117	0.0973676	XLOC_024066	XLOC_024066	1
CC	GO:0031982	vesicle	1/11	25/4115	0.0649117	0.0973676	XLOC_024066	XLOC_024066	1
CC	GO:0097708	intracellular vesicle	1/11	25/4115	0.0649117	0.0973676	XLOC_024066	XLOC_024066	1
BP	GO:0051259	protein complex oligomerization	1/10	40/5730	0.067707	0.130399	102179495	KCNB2	1
CC	GO:0005794	Golgi apparatus	1/11	28/4115	0.072438	0.0985408	XLOC_024066	XLOC_024066	1
CC	GO:0005789	endoplasmic reticulum membrane	1/11	29/4115	0.0749345	0.0985408	102184911	DUOXA2	1
CC	GO:0098827	endoplasmic reticulum subcompartment	1/11	29/4115	0.0749345	0.0985408	102184911	DUOXA2	1
CC	GO:0042175	nuclear outer membrane-endoplasmic reticulum membrane network	1/11	30/4115	0.0774249	0.0985408	102184911	DUOXA2	1
CC	GO:0044432	endoplasmic reticulum part	1/11	30/4115	0.0774249	0.0985408	102184911	DUOXA2	1
MF	GO:0005125	cytokine activity	1/17	47/8677	0.0882763	0.323824	102171111	IL17F	1
MF	GO:0005509	calcium ion binding	2/17	264/8677	0.092956	0.323824	106502554/XLOC_024066	DUOX2/XLOC_024066	2
BP	GO:0007166	cell surface receptor signaling pathway	1/10	56/5730	0.0936136	0.173583	102169419	WNT9B	1
MF	GO:0030246	carbohydrate binding	1/17	50/8677	0.0936542	0.323824	102186681	LOC102186681	1
CC	GO:0098805	whole membrane	1/11	37/4115	0.0946877	0.116967	XLOC_024066	XLOC_024066	1
MF	GO:0005102	signaling receptor binding	2/17	270/8677	0.096579	0.323824	102169419/102171111	WNT9B/IL17F	2
BP	GO:0007275	multicellular organism development	1/10	58/5730	0.0968059	0.173583	102169419	WNT9B	1
CC	GO:0031984	organelle subcompartment	1/11	41/4115	0.10442	0.125304	102184911	DUOXA2	1
BP	GO:0030001	metal ion transport	1/10	64/5730	0.106322	0.174983	102179495	KCNB2	1
BP	GO:0015672	monovalent inorganic cation transport	1/10	65/5730	0.1079	0.174983	102179495	KCNB2	1
BP	GO:0048856	anatomical structure development	1/10	65/5730	0.1079	0.174983	102169419	WNT9B	1
CC	GO:0005783	endoplasmic reticulum	1/11	43/4115	0.10925	0.127458	102184911	DUOXA2	1
MF	GO:0046873	metal ion transmembrane transporter activity	1/17	59/8677	0.10961	0.332354	102179495	KCNB2	1
BP	GO:0032502	developmental process	1/10	67/5730	0.111047	0.174983	102169419	WNT9B	1
CC	GO:0098588	bounding membrane of organelle	1/11	46/4115	0.116451	0.132188	XLOC_024066	XLOC_024066	1
MF	GO:0022836	gated channel activity	1/17	63/8677	0.116616	0.332354	102179495	KCNB2	1
MF	GO:0022839	ion gated channel activity	1/17	63/8677	0.116616	0.332354	102179495	KCNB2	1
MF	GO:0016746	transferase activity, transferring acyl groups	1/17	67/8677	0.12357	0.335403	102185477	TGM2	1
BP	GO:0006886	intracellular protein transport	1/10	78/5730	0.128177	0.196036	XLOC_024066	XLOC_024066	1
MF	GO:0015077	monovalent inorganic cation transmembrane transporter activity	1/17	75/8677	0.137324	0.355793	102179495	KCNB2	1
BP	GO:0034613	cellular protein localization	1/10	85/5730	0.138923	0.200667	XLOC_024066	XLOC_024066	1
BP	GO:0070727	cellular macromolecule localization	1/10	85/5730	0.138923	0.200667	XLOC_024066	XLOC_024066	1
BP	GO:0016192	vesicle-mediated transport	1/10	88/5730	0.143492	0.201665	XLOC_024066	XLOC_024066	1
BP	GO:0046907	intracellular transport	1/10	94/5730	0.152564	0.205424	XLOC_024066	XLOC_024066	1
BP	GO:0051649	establishment of localization in cell	1/10	95/5730	0.154068	0.205424	XLOC_024066	XLOC_024066	1
BP	GO:0051641	cellular localization	1/10	114/5730	0.182184	0.23684	XLOC_024066	XLOC_024066	1
MF	GO:0008289	lipid binding	1/17	102/8677	0.182259	0.427815	102186320	LOC102186320	1
CC	GO:0031090	organelle membrane	1/11	76/4115	0.185606	0.205143	XLOC_024066	XLOC_024066	1
MF	GO:0022890	inorganic cation transmembrane transporter activity	1/17	105/8677	0.187113	0.427815	102179495	KCNB2	1
BP	GO:0065003	protein-containing complex assembly	1/10	119/5730	0.189442	0.239532	102179495	KCNB2	1
MF	GO:0020037	heme binding	1/17	107/8677	0.190334	0.427815	106502554	DUOX2	1
MF	GO:0046906	tetrapyrrole binding	1/17	110/8677	0.195144	0.427815	106502554	DUOX2	1
BP	GO:0043933	protein-containing complex subunit organization	1/10	124/5730	0.196642	0.239532	102179495	KCNB2	1
BP	GO:0006812	cation transport	1/10	125/5730	0.198075	0.239532	102179495	KCNB2	1
MF	GO:0008324	cation transmembrane transporter activity	1/17	117/8677	0.206261	0.43544	102179495	KCNB2	1
BP	GO:0022607	cellular component assembly	1/10	133/5730	0.209457	0.24754	102179495	KCNB2	1
CC	GO:0044444	cytoplasmic part	2/11	353/4115	0.242227	0.26086	102184911/XLOC_024066	DUOXA2/XLOC_024066	2
MF	GO:0005216	ion channel activity	1/17	141/8677	0.243291	0.464795	102179495	KCNB2	1
MF	GO:0022838	substrate-specific channel activity	1/17	141/8677	0.243291	0.464795	102179495	KCNB2	1
BP	GO:0044085	cellular component biogenesis	1/10	159/5730	0.24545	0.278997	102179495	KCNB2	1
BP	GO:0006950	response to stress	1/10	160/5730	0.246805	0.278997	106502554	DUOX2	1
MF	GO:0015267	channel activity	1/17	153/8677	0.26119	0.464795	102179495	KCNB2	1
MF	GO:0022803	passive transmembrane transporter activity	1/17	153/8677	0.26119	0.464795	102179495	KCNB2	1
MF	GO:0003924	GTPase activity	1/17	155/8677	0.264134	0.464795	102190011	RAB3B	1
MF	GO:0030545	receptor regulator activity	1/17	164/8677	0.277246	0.464795	102171111	IL17F	1
MF	GO:0048018	receptor ligand activity	1/17	164/8677	0.277246	0.464795	102171111	IL17F	1
MF	GO:0005198	structural molecule activity	1/17	187/8677	0.309764	0.479565	XLOC_024066	XLOC_024066	1
CC	GO:0005737	cytoplasm	2/11	427/4115	0.318711	0.334646	102184911/XLOC_024066	DUOXA2/XLOC_024066	2
MF	GO:0001883	purine nucleoside binding	1/17	217/8677	0.350112	0.479565	102190011	RAB3B	1
MF	GO:0005525	GTP binding	1/17	217/8677	0.350112	0.479565	102190011	RAB3B	1
MF	GO:0032549	ribonucleoside binding	1/17	217/8677	0.350112	0.479565	102190011	RAB3B	1
MF	GO:0032550	purine ribonucleoside binding	1/17	217/8677	0.350112	0.479565	102190011	RAB3B	1
MF	GO:0032561	guanyl ribonucleotide binding	1/17	217/8677	0.350112	0.479565	102190011	RAB3B	1
MF	GO:0001882	nucleoside binding	1/17	218/8677	0.351418	0.479565	102190011	RAB3B	1
MF	GO:0015318	inorganic molecular entity transmembrane transporter activity	1/17	222/8677	0.356617	0.479565	102179495	KCNB2	1
CC	GO:0044446	intracellular organelle part	2/11	465/4115	0.357952	0.361035	102184911/XLOC_024066	DUOXA2/XLOC_024066	2
BP	GO:0016043	cellular component organization	1/10	250/5730	0.360113	0.398422	102179495	KCNB2	1
CC	GO:0044422	organelle part	2/11	468/4115	0.361035	0.361035	102184911/XLOC_024066	DUOXA2/XLOC_024066	2
MF	GO:0019001	guanyl nucleotide binding	1/17	226/8677	0.361777	0.479565	102190011	RAB3B	1
MF	GO:0048037	cofactor binding	1/17	242/8677	0.382029	0.491762	106502554	DUOX2	1
MF	GO:0015075	ion transmembrane transporter activity	1/17	247/8677	0.388233	0.491762	102179495	KCNB2	1
BP	GO:0071840	cellular component organization or biogenesis	1/10	276/5730	0.389856	0.416097	102179495	KCNB2	1
BP	GO:0006811	ion transport	1/10	278/5730	0.392092	0.416097	102179495	KCNB2	1
BP	GO:0006468	protein phosphorylation	1/10	331/5730	0.448713	0.466662	102186564	NRK	1
BP	GO:0016310	phosphorylation	1/10	353/5730	0.470788	0.480019	102186564	NRK	1
MF	GO:0004672	protein kinase activity	1/17	340/8677	0.49347	0.574884	102186564	NRK	1
BP	GO:0055085	transmembrane transport	1/10	387/5730	0.503341	0.503341	102179495	KCNB2	1
MF	GO:0017111	nucleoside-triphosphatase activity	1/17	356/8677	0.50976	0.574884	102190011	RAB3B	1
MF	GO:0016462	pyrophosphatase activity	1/17	362/8677	0.51574	0.574884	102190011	RAB3B	1
MF	GO:0016818	hydrolase activity, acting on acid anhydrides, in phosphorus-containing anhydrides	1/17	365/8677	0.518705	0.574884	102190011	RAB3B	1
MF	GO:0016817	hydrolase activity, acting on acid anhydrides	1/17	370/8677	0.523608	0.574884	102190011	RAB3B	1
MF	GO:0098772	molecular function regulator	1/17	371/8677	0.524583	0.574884	102171111	IL17F	1
MF	GO:0016773	phosphotransferase activity, alcohol group as acceptor	1/17	377/8677	0.530393	0.574884	102186564	NRK	1
MF	GO:0016301	kinase activity	1/17	388/8677	0.540872	0.574884	102186564	NRK	1
MF	GO:0046914	transition metal ion binding	1/17	392/8677	0.544627	0.574884	102172204	LOC102172204	1
MF	GO:0022857	transmembrane transporter activity	1/17	411/8677	0.562075	0.582514	102179495	KCNB2	1
MF	GO:0005215	transporter activity	1/17	437/8677	0.584933	0.595378	102179495	KCNB2	1
MF	GO:0016772	transferase activity, transferring phosphorus-containing groups	1/17	465/8677	0.608292	0.608292	102186564	NRK	1

## Sheet: Table S9
Table S9 KEGG pathway analysis of co-DE mRNAs in anagen phase
KEGGID	Description	GeneRatio	BgRatio	pvalue	padj	geneID	geneName	keggID	Count
chx05415	Diabetic cardiomyopathy	7/50	218/8945	0.000189984	0.0326772	102188148/1485866/1485867/102187210/108634775/1485856/1485860	PLCB1/ND5/ND6/CPT1B/LOC108634775/ND1/ATP8	chx:102188148/chx:1485866/chx:1485867/chx:102187210/chx:108634775/chx:1485856/chx:1485860	7
chx03010	Ribosome	6/50	207/8945	0.00097114	0.0698162	102176734/102183387/102182011/102171417/108634233/102173098	LOC102176734/LOC102183387/LOC102182011/LOC102171417/LOC108634233/LOC102173098	chx:100860776/chx:100861018/chx:102179042/chx:102184058/chx:102177159/chx:102190162	6
chx05171	Coronavirus disease - COVID-19	7/50	308/8945	0.00149956	0.0698162	102176734/102183387/102182011/102171417/108634233/102173098/102171520	LOC102176734/LOC102183387/LOC102182011/LOC102171417/LOC108634233/LOC102173098/FOS	chx:100860776/chx:100861018/chx:102179042/chx:102184058/chx:102177159/chx:102190162/chx:102171520	7
chx04714	Thermogenesis	6/50	239/8945	0.00202954	0.0698162	1485866/1485867/102187210/102171417/1485856/1485860	ND5/ND6/CPT1B/LOC102171417/ND1/ATP8	chx:1485866/chx:1485867/chx:102187210/chx:102184058/chx:1485856/chx:1485860	6
chx05208	Chemical carcinogenesis - reactive oxygen species	6/50	239/8945	0.00202954	0.0698162	1485866/1485867/102171520/1485856/102178048/1485860	ND5/ND6/FOS/ND1/NOX1/ATP8	chx:1485866/chx:1485867/chx:102171520/chx:1485856/chx:102178048/chx:1485860	6
chx05031	Amphetamine addiction	3/50	70/8945	0.00691633	0.184114	102191614/102171520/100860839	GRIN3A/FOS/FOSB	chx:102191614/chx:102171520/chx:100860839	3
chx00190	Oxidative phosphorylation	4/50	140/8945	0.00758357	0.184114	1485866/1485867/1485856/1485860	ND5/ND6/ND1/ATP8	chx:1485866/chx:1485867/chx:1485856/chx:1485860	4
chx04723	Retrograde endocannabinoid signaling	4/50	145/8945	0.00856342	0.184114	102188148/1485866/1485867/1485856	PLCB1/ND5/ND6/ND1	chx:102188148/chx:1485866/chx:1485867/chx:1485856	4
chx04917	Prolactin signaling pathway	3/50	79/8945	0.00964713	0.184367	102171162/102171520/100860784	SOCS5/FOS/CSN2	chx:102171162/chx:102171520/chx:100860784	3
chx05020	Prion disease	5/50	273/8945	0.0176502	0.29108	1485866/1485867/102191614/1485856/1485860	ND5/ND6/GRIN3A/ND1/ATP8	chx:1485866/chx:1485867/chx:102191614/chx:1485856/chx:1485860	5
chx04933	AGE-RAGE signaling pathway in diabetic complications	3/50	104/8945	0.0201598	0.29108	102188148/108634775/102178048	PLCB1/LOC108634775/NOX1	chx:102188148/chx:108634775/chx:102178048	3
chx05010	Alzheimer disease	6/50	388/8945	0.0203079	0.29108	102188148/1485866/1485867/1485856/102178048/1485860	PLCB1/ND5/ND6/ND1/NOX1/ATP8	chx:102188148/chx:1485866/chx:1485867/chx:1485856/chx:102178048/chx:1485860	6
chx00790	Folate biosynthesis	2/50	44/8945	0.0249493	0.320036	102191246/102181060	GPHN/LOC102181060	chx:102191246/chx:102176806	2
chx05034	Alcoholism	4/50	203/8945	0.0263159	0.320036	102181263/108634456/102191614/100860839	HDAC9/LOC108634456/GRIN3A/FOSB	chx:102181263/chx:108634456/chx:102191614/chx:100860839	4
chx05016	Huntington disease	5/50	309/8945	0.0283646	0.320036	102188148/1485866/1485867/1485856/1485860	PLCB1/ND5/ND6/ND1/ATP8	chx:102188148/chx:1485866/chx:1485867/chx:1485856/chx:1485860	5
chx04380	Osteoclast differentiation	3/50	122/8945	0.0304873	0.320036	102171520/100860839/102178048	FOS/FOSB/NOX1	chx:102171520/chx:100860839/chx:102178048	3
chx05030	Cocaine addiction	2/50	50/8945	0.0316315	0.320036	102191614/100860839	GRIN3A/FOSB	chx:102191614/chx:100860839	2
chx04926	Relaxin signaling pathway	3/50	130/8945	0.0358213	0.342293	102188148/108634775/102171520	PLCB1/LOC108634775/FOS	chx:102188148/chx:108634775/chx:102171520	3
chx00230	Purine metabolism	3/50	134/8945	0.0386581	0.349958	102191543/102181635/102171067	NME7/FHIT/GDA	chx:102191543/chx:102181635/chx:102171067	3
chx05418	Fluid shear stress and atherosclerosis	3/50	143/8945	0.0454493	0.37236	100861211/102171520/102178048	BMPR1B/FOS/NOX1	chx:100861211/chx:102171520/chx:102178048	3
chx01212	Fatty acid metabolism	2/50	61/8945	0.0454625	0.37236	102187210/100861212	CPT1B/LOC100861212	chx:102187210/chx:100861212	2
chx05022	Pathways of neurodegeneration - multiple diseases	6/50	479/8945	0.0494222	0.386391	102188148/1485866/1485867/1485856/102178048/1485860	PLCB1/ND5/ND6/ND1/NOX1/ATP8	chx:102188148/chx:1485866/chx:1485867/chx:1485856/chx:102178048/chx:1485860	6
chx01240	Biosynthesis of cofactors	3/50	163/8945	0.0625075	0.464089	102191246/102191543/102181060	GPHN/NME7/LOC102181060	chx:102191246/chx:102191543/chx:102176806	3
chx05012	Parkinson disease	4/50	272/8945	0.0647566	0.464089	1485866/1485867/1485856/1485860	ND5/ND6/ND1/ATP8	chx:1485866/chx:1485867/chx:1485856/chx:1485860	4
chx01232	Nucleotide metabolism	2/50	86/8945	0.0832201	0.572554	102191543/102171067	NME7/GDA	chx:102191543/chx:102171067	2
chx03320	PPAR signaling pathway	2/50	89/8945	0.0882401	0.579513	102187210/100861212	CPT1B/LOC100861212	chx:102187210/chx:100861212	2
chx00604	Glycosphingolipid biosynthesis - ganglio series	1/50	17/8945	0.0909701	0.579513	102182559	ST6GALNAC5	chx:102182559	1
chx04657	IL-17 signaling pathway	2/50	93/8945	0.0950715	0.584011	102171520/100860839	FOS/FOSB	chx:102171520/chx:100860839	2
chx04713	Circadian entrainment	2/50	98/8945	0.103818	0.59734	102188148/102171520	PLCB1/FOS	chx:102188148/chx:102171520	2
chx04613	Neutrophil extracellular trap formation	3/50	206/8945	0.107558	0.59734	102181263/102188148/108634456	HDAC9/PLCB1/LOC108634456	chx:102181263/chx:102188148/chx:108634456	3
chx00900	Terpenoid backbone biosynthesis	1/50	21/8945	0.111167	0.59734	102191138	PDSS2	chx:102191138	1
chx04928	Parathyroid hormone synthesis, secretion and action	2/50	104/8945	0.114595	0.59734	102188148/102171520	PLCB1/FOS	chx:102188148/chx:102171520	2
chx04922	Glucagon signaling pathway	2/50	105/8945	0.116418	0.59734	102188148/102187210	PLCB1/CPT1B	chx:102188148/chx:102187210	2
chx03060	Protein export	1/50	24/8945	0.126025	0.59734	102187187	IMMP2L	chx:102187187	1
chx04724	Glutamatergic synapse	2/50	111/8945	0.127514	0.59734	102188148/102191614	PLCB1/GRIN3A	chx:102188148/chx:102191614	2
chx04725	Cholinergic synapse	2/50	111/8945	0.127514	0.59734	102188148/102171520	PLCB1/FOS	chx:102188148/chx:102171520	2
chx05142	Chagas disease	2/50	113/8945	0.131268	0.59734	102188148/102171520	PLCB1/FOS	chx:102188148/chx:102171520	2
chx05146	Amoebiasis	2/50	116/8945	0.136947	0.59734	102188148/108634775	PLCB1/LOC108634775	chx:102188148/chx:108634775	2
chx05417	Lipid and atherosclerosis	3/50	230/8945	0.13696	0.59734	102188148/102171520/102178048	PLCB1/FOS/NOX1	chx:102188148/chx:102171520/chx:102178048	3
chx04935	Growth hormone synthesis, secretion and action	2/50	119/8945	0.142681	0.59734	102188148/102171520	PLCB1/FOS	chx:102188148/chx:102171520	2
chx04151	PI3K-Akt signaling pathway	4/50	369/8945	0.150095	0.59734	106502021/102171417/102190431/108634775	MAGI2/LOC102171417/SGK2/LOC108634775	chx:106502021/chx:102184058/chx:102190431/chx:108634775	4
chx04024	cAMP signaling pathway	3/50	241/8945	0.151284	0.59734	108637248/102191614/102171520	LOC108637248/GRIN3A/FOS	chx:108637248/chx:102191614/chx:102171520	3
chx04611	Platelet activation	2/50	125/8945	0.154301	0.59734	102188148/108634775	PLCB1/LOC108634775	chx:102188148/chx:108634775	2
chx05014	Amyotrophic lateral sclerosis	4/50	374/8945	0.155344	0.59734	1485866/1485867/1485856/1485860	ND5/ND6/ND1/ATP8	chx:1485866/chx:1485867/chx:1485856/chx:1485860	4
chx00592	alpha-Linolenic acid metabolism	1/50	31/8945	0.159754	0.59734	100861212	LOC100861212	chx:100861212	1
chx01040	Biosynthesis of unsaturated fatty acids	1/50	31/8945	0.159754	0.59734	100861212	LOC100861212	chx:100861212	1
chx00630	Glyoxylate and dicarboxylate metabolism	1/50	33/8945	0.169154	0.609424	102174621	LOC102174621	chx:108634030	1
chx04728	Dopaminergic synapse	2/50	133/8945	0.170072	0.609424	102188148/102171520	PLCB1/FOS	chx:102188148/chx:102171520	2
chx04915	Estrogen signaling pathway	2/50	136/8945	0.176057	0.617997	102188148/102171520	PLCB1/FOS	chx:102188148/chx:102171520	2
chx04371	Apelin signaling pathway	2/50	140/8945	0.184091	0.62792	102188148/102171417	PLCB1/LOC102171417	chx:102188148/chx:102184058	2
chx05017	Spinocerebellar ataxia	2/50	144/8945	0.192179	0.62792	102188148/102191614	PLCB1/GRIN3A	chx:102188148/chx:102191614	2
chx05135	Yersinia infection	2/50	144/8945	0.192179	0.62792	102188466/102171520	WASL/FOS	chx:102188466/chx:102171520	2
chx05143	African trypanosomiasis	1/50	39/8945	0.19674	0.62792	102188148	PLCB1	chx:102188148	1
chx05033	Nicotine addiction	1/50	40/8945	0.20125	0.62792	102191614	GRIN3A	chx:102191614	1
chx03440	Homologous recombination	1/50	42/8945	0.210195	0.62792	102168649	NBN	chx:102168649	1
chx04921	Oxytocin signaling pathway	2/50	153/8945	0.210548	0.62792	102188148/102171520	PLCB1/FOS	chx:102188148/chx:102171520	2
chx04261	Adrenergic signaling in cardiomyocytes	2/50	155/8945	0.214656	0.62792	102188148/102185261	PLCB1/TNNT2	chx:102188148/chx:102185261	2
chx00513	Various types of N-glycan biosynthesis	1/50	44/8945	0.219042	0.62792	106501835	LOC106501835	chx:106501835	1
chx01523	Antifolate resistance	1/50	44/8945	0.219042	0.62792	108637248	LOC108637248	chx:108637248	1
chx03022	Basal transcription factors	1/50	44/8945	0.219042	0.62792	102178628	MNAT1	chx:102178628	1
chx04973	Carbohydrate digestion and absorption	1/50	47/8945	0.23213	0.643669	102188148	PLCB1	chx:102188148	1
chx00260	Glycine, serine and threonine metabolism	1/50	48/8945	0.236445	0.643669	102174621	LOC102174621	chx:108634030	1
chx00270	Cysteine and methionine metabolism	1/50	51/8945	0.249248	0.643669	102179544	AHCYL2	chx:102179544	1
chx00071	Fatty acid degradation	1/50	52/8945	0.253468	0.643669	102187210	CPT1B	chx:102187210	1
chx00510	N-Glycan biosynthesis	1/50	52/8945	0.253468	0.643669	106501835	LOC106501835	chx:106501835	1
chx04961	Endocrine and other factor-regulated calcium reabsorption	1/50	52/8945	0.253468	0.643669	102188148	PLCB1	chx:102188148	1
chx00240	Pyrimidine metabolism	1/50	55/8945	0.265991	0.643669	102191543	NME7	chx:102191543	1
chx03420	Nucleotide excision repair	1/50	59/8945	0.282368	0.643669	102178628	MNAT1	chx:102178628	1
chx04730	Long-term depression	1/50	60/8945	0.286406	0.643669	102188148	PLCB1	chx:102188148	1
chx04929	GnRH secretion	1/50	63/8945	0.298387	0.643669	102188148	PLCB1	chx:102188148	1
chx02010	ABC transporters	1/50	64/8945	0.302336	0.643669	108637248	LOC108637248	chx:108637248	1
chx04927	Cortisol synthesis and secretion	1/50	65/8945	0.306264	0.643669	102188148	PLCB1	chx:102188148	1
chx04720	Long-term potentiation	1/50	66/8945	0.31017	0.643669	102188148	PLCB1	chx:102188148	1
chx00310	Lysine degradation	1/50	68/8945	0.317918	0.643669	102191622	CAMKMT	chx:102191622	1
chx05205	Proteoglycans in cancer	2/50	206/8945	0.320534	0.643669	102171417/108634775	LOC102171417/LOC108634775	chx:102184058/chx:108634775	2
chx04662	B cell receptor signaling pathway	1/50	70/8945	0.325581	0.643669	102171520	FOS	chx:102171520	1
chx04920	Adipocytokine signaling pathway	1/50	71/8945	0.32938	0.643669	102187210	CPT1B	chx:102187210	1
chx05223	Non-small cell lung cancer	1/50	71/8945	0.32938	0.643669	102181635	FHIT	chx:102181635	1
chx04015	Rap1 signaling pathway	2/50	211/8945	0.330852	0.643669	106502021/102188148	MAGI2/PLCB1	chx:106502021/chx:102188148	2
chx00562	Inositol phosphate metabolism	1/50	72/8945	0.333159	0.643669	102188148	PLCB1	chx:102188148	1
chx04924	Renin secretion	1/50	73/8945	0.336917	0.643669	102188148	PLCB1	chx:102188148	1
chx05140	Leishmaniasis	1/50	74/8945	0.340653	0.643669	102171520	FOS	chx:102171520	1
chx04918	Thyroid hormone synthesis	1/50	76/8945	0.348066	0.643669	102188148	PLCB1	chx:102188148	1
chx05133	Pertussis	1/50	77/8945	0.351741	0.643669	102171520	FOS	chx:102171520	1
chx05203	Viral carcinogenesis	2/50	222/8945	0.353405	0.643669	102181263/108634456	HDAC9/LOC108634456	chx:102181263/chx:108634456	2
chx03018	RNA degradation	1/50	79/8945	0.359031	0.643669	102187134	ZCCHC7	chx:102187134	1
chx04971	Gastric acid secretion	1/50	79/8945	0.359031	0.643669	102188148	PLCB1	chx:102188148	1
chx05100	Bacterial invasion of epithelial cells	1/50	79/8945	0.359031	0.643669	102188466	WASL	chx:102188466	1
chx01521	EGFR tyrosine kinase inhibitor resistance	1/50	81/8945	0.36624	0.643669	102171417	LOC102171417	chx:102184058	1
chx00983	Drug metabolism - other enzymes	1/50	82/8945	0.369815	0.643669	102191543	NME7	chx:102191543	1
chx04742	Taste transduction	1/50	84/8945	0.376906	0.643669	102188148	PLCB1	chx:102188148	1
chx05166	Human T-cell leukemia virus 1 infection	2/50	235/8945	0.379737	0.643669	102177553/102171520	ANAPC10/FOS	chx:102177553/chx:102171520	2
chx04911	Insulin secretion	1/50	87/8945	0.387395	0.643669	102188148	PLCB1	chx:102188148	1
chx04540	Gap junction	1/50	88/8945	0.390853	0.643669	102188148	PLCB1	chx:102188148	1
chx05235	PD-L1 expression and PD-1 checkpoint pathway in cancer	1/50	88/8945	0.390853	0.643669	102171520	FOS	chx:102171520	1
chx04658	Th1 and Th2 cell differentiation	1/50	89/8945	0.394292	0.643669	102171520	FOS	chx:102171520	1
chx04727	GABAergic synapse	1/50	89/8945	0.394292	0.643669	102191246	GPHN	chx:102191246	1
chx05210	Colorectal cancer	1/50	89/8945	0.394292	0.643669	102171520	FOS	chx:102171520	1
chx04520	Adherens junction	1/50	91/8945	0.401113	0.643669	102188466	WASL	chx:102188466	1
chx04912	GnRH signaling pathway	1/50	91/8945	0.401113	0.643669	102188148	PLCB1	chx:102188148	1
chx05410	Hypertrophic cardiomyopathy	1/50	91/8945	0.401113	0.643669	102185261	TNNT2	chx:102185261	1
chx04260	Cardiac muscle contraction	1/50	92/8945	0.404495	0.643669	102185261	TNNT2	chx:102185261	1
chx04914	Progesterone-mediated oocyte maturation	1/50	92/8945	0.404495	0.643669	102177553	ANAPC10	chx:102177553	1
chx04970	Salivary secretion	1/50	94/8945	0.411203	0.643669	102188148	PLCB1	chx:102188148	1
chx05323	Rheumatoid arthritis	1/50	94/8945	0.411203	0.643669	102171520	FOS	chx:102171520	1
chx04512	ECM-receptor interaction	1/50	95/8945	0.414529	0.643669	108634775	LOC108634775	chx:108634775	1
chx04925	Aldosterone synthesis and secretion	1/50	95/8945	0.414529	0.643669	102188148	PLCB1	chx:102188148	1
chx05414	Dilated cardiomyopathy	1/50	95/8945	0.414529	0.643669	102185261	TNNT2	chx:102185261	1
chx01522	Endocrine resistance	1/50	96/8945	0.417837	0.643669	102171520	FOS	chx:102171520	1
chx04070	Phosphatidylinositol signaling system	1/50	97/8945	0.421126	0.643669	102188148	PLCB1	chx:102188148	1
chx05231	Choline metabolism in cancer	1/50	98/8945	0.424397	0.643669	102171520	FOS	chx:102171520	1
chx05222	Small cell lung cancer	1/50	99/8945	0.42765	0.643669	102181635	FHIT	chx:102181635	1
chx04916	Melanogenesis	1/50	100/8945	0.430885	0.643669	102188148	PLCB1	chx:102188148	1
chx05132	Salmonella infection	2/50	262/8945	0.432979	0.643669	102188466/102171520	WASL/FOS	chx:102188466/chx:102171520	2
chx04350	TGF-beta signaling pathway	1/50	101/8945	0.434103	0.643669	100861211	BMPR1B	chx:100861211	1
chx04660	T cell receptor signaling pathway	1/50	101/8945	0.434103	0.643669	102171520	FOS	chx:102171520	1
chx04659	Th17 cell differentiation	1/50	105/8945	0.446794	0.65582	102171520	FOS	chx:102171520	1
chx04972	Pancreatic secretion	1/50	106/8945	0.449923	0.65582	102188148	PLCB1	chx:102188148	1
chx04976	Bile secretion	1/50	109/8945	0.459206	0.659117	108637248	LOC108637248	chx:108637248	1
chx04620	Toll-like receptor signaling pathway	1/50	110/8945	0.462266	0.659117	102171520	FOS	chx:102171520	1
chx04066	HIF-1 signaling pathway	1/50	113/8945	0.471345	0.659117	102171417	LOC102171417	chx:102184058	1
chx04750	Inflammatory mediator regulation of TRP channels	1/50	113/8945	0.471345	0.659117	102188148	PLCB1	chx:102188148	1
chx04931	Insulin resistance	1/50	113/8945	0.471345	0.659117	102187210	CPT1B	chx:102187210	1
chx01200	Carbon metabolism	1/50	117/8945	0.483218	0.667383	102174621	LOC102174621	chx:108634030	1
chx04668	TNF signaling pathway	1/50	121/8945	0.494828	0.667383	102171520	FOS	chx:102171520	1
chx04919	Thyroid hormone signaling pathway	1/50	122/8945	0.497691	0.667383	102188148	PLCB1	chx:102188148	1
chx04071	Sphingolipid signaling pathway	1/50	123/8945	0.500537	0.667383	102188148	PLCB1	chx:102188148	1
chx04114	Oocyte meiosis	1/50	123/8945	0.500537	0.667383	102177553	ANAPC10	chx:102177553	1
chx04726	Serotonergic synapse	1/50	123/8945	0.500537	0.667383	102188148	PLCB1	chx:102188148	1
chx04152	AMPK signaling pathway	1/50	125/8945	0.506183	0.669719	102187210	CPT1B	chx:102187210	1
chx04068	FoxO signaling pathway	1/50	130/8945	0.520025	0.682782	102190431	SGK2	chx:102190431	1
chx03040	Spliceosome	1/50	137/8945	0.538768	0.690558	108634333	LOC108634333	chx:102190526	1
chx04974	Protein digestion and absorption	1/50	138/8945	0.541386	0.690558	108634775	LOC108634775	chx:108634775	1
chx04910	Insulin signaling pathway	1/50	140/8945	0.546579	0.690558	102171417	LOC102171417	chx:102184058	1
chx04550	Signaling pathways regulating pluripotency of stem cells	1/50	142/8945	0.551714	0.690558	100861211	BMPR1B	chx:100861211	1
chx05162	Measles	1/50	143/8945	0.554261	0.690558	102171520	FOS	chx:102171520	1
chx04270	Vascular smooth muscle contraction	1/50	145/8945	0.55931	0.690558	102188148	PLCB1	chx:102188148	1
chx04072	Phospholipase D signaling pathway	1/50	147/8945	0.564304	0.690558	102188148	PLCB1	chx:102188148	1
chx04120	Ubiquitin mediated proteolysis	1/50	149/8945	0.569243	0.690558	102177553	ANAPC10	chx:102177553	1
chx04936	Alcoholic liver disease	1/50	150/8945	0.571691	0.690558	102187210	CPT1B	chx:102187210	1
chx05322	Systemic lupus erythematosus	1/50	150/8945	0.571691	0.690558	108634456	LOC108634456	chx:108634456	1
chx04210	Apoptosis	1/50	151/8945	0.574126	0.690558	102171520	FOS	chx:102171520	1
chx05224	Breast cancer	1/50	151/8945	0.574126	0.690558	102171520	FOS	chx:102171520	1
chx04934	Cushing syndrome	1/50	155/8945	0.583731	0.696704	102188148	PLCB1	chx:102188148	1
chx04390	Hippo signaling pathway	1/50	157/8945	0.588454	0.696704	100861211	BMPR1B	chx:100861211	1
chx04932	Non-alcoholic fatty liver disease	1/50	159/8945	0.593124	0.696704	102171520	FOS	chx:102171520	1
chx04150	mTOR signaling pathway	1/50	160/8945	0.595439	0.696704	102171417	LOC102171417	chx:102184058	1
chx04110	Cell cycle	1/50	163/8945	0.602308	0.698393	102177553	ANAPC10	chx:102177553	1
chx04218	Cellular senescence	1/50	166/8945	0.609063	0.698393	102168649	NBN	chx:102168649	1
chx05161	Hepatitis B	1/50	166/8945	0.609063	0.698393	102171520	FOS	chx:102171520	1
chx04022	cGMP-PKG signaling pathway	1/50	168/8945	0.613504	0.698826	102188148	PLCB1	chx:102188148	1
chx04141	Protein processing in endoplasmic reticulum	1/50	171/8945	0.620072	0.699509	106501835	LOC106501835	chx:106501835	1
chx04310	Wnt signaling pathway	1/50	172/8945	0.622238	0.699509	102188148	PLCB1	chx:102188148	1
chx05225	Hepatocellular carcinoma	1/50	174/8945	0.626531	0.699762	102168890	ARID2	chx:102168890	1
chx04621	NOD-like receptor signaling pathway	1/50	179/8945	0.637058	0.706929	102188148	PLCB1	chx:102188148	1
chx04360	Axon guidance	1/50	181/8945	0.641187	0.70695	100861211	BMPR1B	chx:100861211	1
chx04062	Chemokine signaling pathway	1/50	189/8945	0.657247	0.720041	102188148	PLCB1	chx:102188148	1
chx04814	Motor proteins	1/50	197/8945	0.672601	0.732199	102185261	TNNT2	chx:102185261	1
chx04510	Focal adhesion	1/50	206/8945	0.68907	0.739097	108634775	LOC108634775	chx:108634775	1
chx04630	JAK-STAT signaling pathway	1/50	209/8945	0.694377	0.739097	102171162	SOCS5	chx:102171162	1
chx05167	Kaposi sarcoma-associated herpesvirus infection	1/50	209/8945	0.694377	0.739097	102171520	FOS	chx:102171520	1
chx05207	Chemical carcinogenesis - receptor activation	1/50	210/8945	0.696126	0.739097	102171520	FOS	chx:102171520	1
chx04810	Regulation of actin cytoskeleton	1/50	231/8945	0.730674	0.766317	102188466	WASL	chx:102188466	1
chx05170	Human immunodeficiency virus 1 infection	1/50	231/8945	0.730674	0.766317	102171520	FOS	chx:102171520	1
chx04020	Calcium signaling pathway	1/50	238/8945	0.741311	0.772697	102188148	PLCB1	chx:102188148	1
chx05163	Human cytomegalovirus infection	1/50	241/8945	0.745742	0.772697	102188148	PLCB1	chx:102188148	1
chx04144	Endocytosis	1/50	255/8945	0.765458	0.788376	102188466	WASL	chx:102188466	1
chx04010	MAPK signaling pathway	1/50	294/8945	0.812816	0.832168	102171520	FOS	chx:102171520	1
chx04060	Cytokine-cytokine receptor interaction	1/50	339/8945	0.855889	0.871082	100861211	BMPR1B	chx:100861211	1
chx05165	Human papillomavirus infection	1/50	355/8945	0.868728	0.878948	108634775	LOC108634775	chx:108634775	1
chx04080	Neuroactive ligand-receptor interaction	1/50	380/8945	0.886577	0.891761	102191614	GRIN3A	chx:102191614	1
chx05168	Herpes simplex virus 1 infection	1/50	443/8945	0.92167	0.92167	102172461	ZNF623	chx:102172461	1

## Sheet: Table S10
Table S10 KEGG pathway analysis of co-DE mRNAs in catagen phase
KEGGID	Description	GeneRatio	BgRatio	pvalue	padj	geneID	geneName	keggID	Count
chx05146	Amoebiasis	3/7	116/8935	7.18527e-05	0.00237114	102178438/102182683/108633803	CXCL8/LOC102182683/LOC108633803	chx:102178438/chx:102182683/chx:108633803	3
chx05144	Malaria	2/7	52/8935	0.000684764	0.009694	102178438/102175045	CXCL8/HBBC	chx:102178438/chx:102175045	2
chx05134	Legionellosis	2/7	59/8935	0.000881273	0.009694	102178438/102182683	CXCL8/LOC102182683	chx:102178438/chx:102182683	2
chx04060	Cytokine-cytokine receptor interaction	3/7	339/8935	0.00169083	0.0109784	102178438/102182683/102182235	CXCL8/LOC102182683/IL36B	chx:102178438/chx:102182683/chx:102182235	3
chx04657	IL-17 signaling pathway	2/7	93/8935	0.00217558	0.0109784	102178438/102182683	CXCL8/LOC102182683	chx:102178438/chx:102182683	2
chx05323	Rheumatoid arthritis	2/7	94/8935	0.00222204	0.0109784	102178438/102182683	CXCL8/LOC102182683	chx:102178438/chx:102182683	2
chx04061	Viral protein interaction with cytokine and cytokine receptor	2/7	101/8935	0.0025605	0.0109784	102178438/102182683	CXCL8/LOC102182683	chx:102178438/chx:102182683	2
chx04064	NF-kappa B signaling pathway	2/7	103/8935	0.00266143	0.0109784	102178438/102182683	CXCL8/LOC102182683	chx:102178438/chx:102182683	2
chx04936	Alcoholic liver disease	2/7	150/8935	0.00556291	0.0203974	102178438/102182683	CXCL8/LOC102182683	chx:102178438/chx:102182683	2
chx04621	NOD-like receptor signaling pathway	2/7	179/8935	0.00784458	0.0258871	102178438/102182683	CXCL8/LOC102182683	chx:102178438/chx:102182683	2
chx04062	Chemokine signaling pathway	2/7	189/8935	0.00871534	0.026146	102178438/102182683	CXCL8/LOC102182683	chx:102178438/chx:102182683	2
chx05167	Kaposi sarcoma-associated herpesvirus infection	2/7	209/8935	0.010583	0.0291033	102178438/102182683	CXCL8/LOC102182683	chx:102178438/chx:102182683	2
chx05417	Lipid and atherosclerosis	2/7	230/8935	0.0127213	0.0322926	102178438/102182683	CXCL8/LOC102182683	chx:102178438/chx:102182683	2
chx05219	Bladder cancer	1/7	38/8935	0.0294032	0.066367	102178438	CXCL8	chx:102178438	1
chx05143	African trypanosomiasis	1/7	39/8935	0.0301668	0.066367	102175045	HBBC	chx:102175045	1
chx05133	Pertussis	1/7	77/8935	0.0588064	0.121288	102178438	CXCL8	chx:102178438	1
chx04970	Salivary secretion	1/7	94/8935	0.0713823	0.133991	108633237	LOC108633237	chx:108633237	1
chx04933	AGE-RAGE signaling pathway in diabetic complications	1/7	104/8935	0.0787123	0.133991	102178438	CXCL8	chx:102178438	1
chx04622	RIG-I-like receptor signaling pathway	1/7	107/8935	0.0809016	0.133991	102178438	CXCL8	chx:102178438	1
chx04620	Toll-like receptor signaling pathway	1/7	110/8935	0.0830865	0.133991	102178438	CXCL8	chx:102178438	1
chx05142	Chagas disease	1/7	113/8935	0.0852669	0.133991	102178438	CXCL8	chx:102178438	1
chx04668	TNF signaling pathway	1/7	121/8935	0.0910596	0.136589	102182683	LOC102182683	chx:102182683	1
chx05135	Yersinia infection	1/7	144/8935	0.107539	0.147185	102178438	CXCL8	chx:102178438	1
chx04072	Phospholipase D signaling pathway	1/7	147/8935	0.109669	0.147185	102178438	CXCL8	chx:102178438	1
chx04932	Non-alcoholic fatty liver disease	1/7	158/8935	0.117444	0.147185	102178438	CXCL8	chx:102178438	1
chx04218	Cellular senescence	1/7	166/8935	0.123061	0.147185	102178438	CXCL8	chx:102178438	1
chx05161	Hepatitis B	1/7	166/8935	0.123061	0.147185	102178438	CXCL8	chx:102178438	1
chx04310	Wnt signaling pathway	1/7	172/8935	0.127254	0.147185	102174709	PRICKLE4	chx:102174709	1
chx05164	Influenza A	1/7	175/8935	0.129344	0.147185	102178438	CXCL8	chx:102178438	1
chx05202	Transcriptional misregulation in cancer	1/7	199/8935	0.145911	0.160502	102178438	CXCL8	chx:102178438	1
chx05163	Human cytomegalovirus infection	1/7	241/8935	0.174253	0.185495	102178438	CXCL8	chx:102178438	1
chx05132	Salmonella infection	1/7	262/8935	0.188118	0.193997	102178438	CXCL8	chx:102178438	1
chx05171	Coronavirus disease - COVID-19	1/7	301/8935	0.21334	0.21334	102178438	CXCL8	chx:102178438	1

[truncated: 1 more sheets: Table S11]
